# Supplementary material for: Overexpression of OsMed16 Inhibits the Growth of Rice and Causes Spontaneous Cell Death
Source: MDPI journal article supplement (doi:10.3390/genes12050656), 2021-04-27
Supplement: s1 [file s1]

## Supplementary Materials

### Overexpression of *OsMed16* inhibits the growth of rice and causes spontaneous cell death

Jie Jiang<sup>1</sup>#, Guangzhe Yang<sup>1</sup>#, Yafeng Xin<sup>1</sup>, Zhigang Wang<sup>1</sup>, Wei Yan<sup>2,3</sup>, Zhufeng

Chen<sup>3,4</sup>, Xiaoyan Tang<sup>2,3</sup>\*, Jixing Xia<sup>1</sup>\*

<sup>1</sup> *State Key Laboratory for Conservation and Utilization of Subtropical Agro-bioresources, College of Life Science and Technology, Guangxi University, Nanning 530004, China*

<sup>2</sup> *Guangdong Provincial Key Laboratory of Biotechnology for Plant Development, School of Life Sciences, South China Normal University, Guangzhou 510631, China*

<sup>3</sup> *Shenzhen Institute of Molecular Crop Design, Shenzhen 518107, China*

<sup>4</sup> *Shenzhen Agricultural Technology Promotion Center, Shenzhen 518055, China*

# These authors contributed equally to this work.

\* Corresponding author: txy@frontierag.com (X.T.); xiajx@gxu.edu.cn (J.X.)

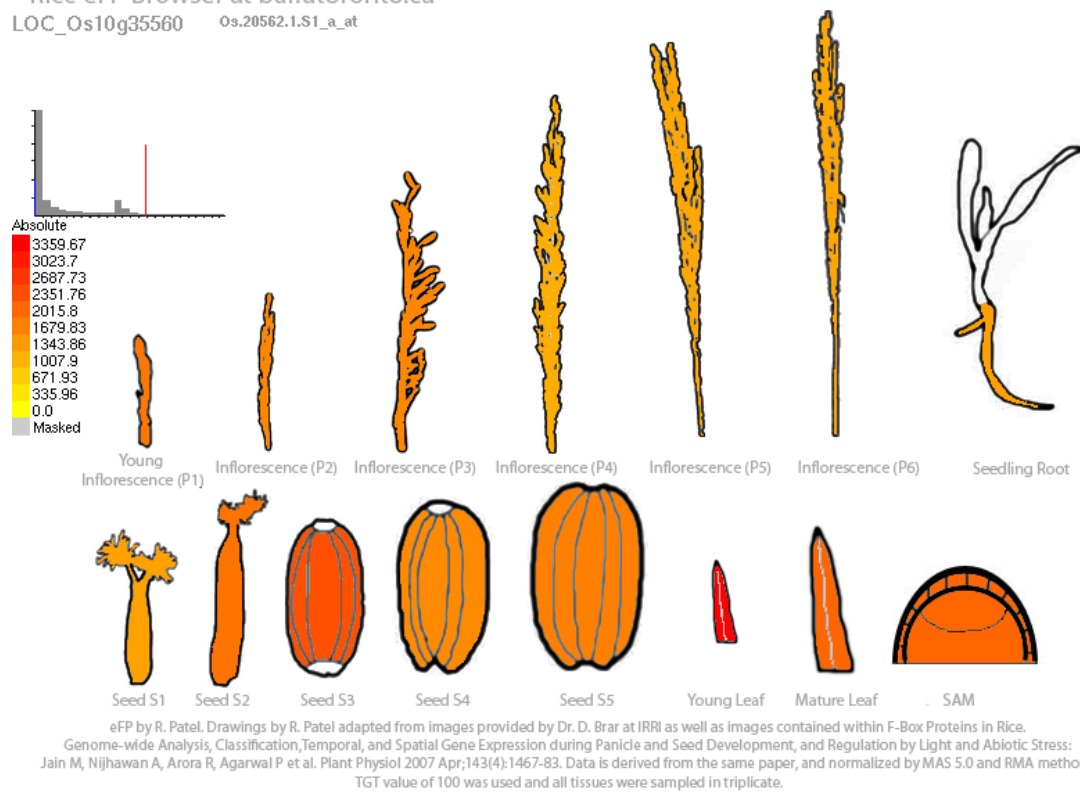

**Figure S1. Transcript level of *OsMed16* in the developing inflorescence and seed.**

The result was extracted from the eFP browser database [31].

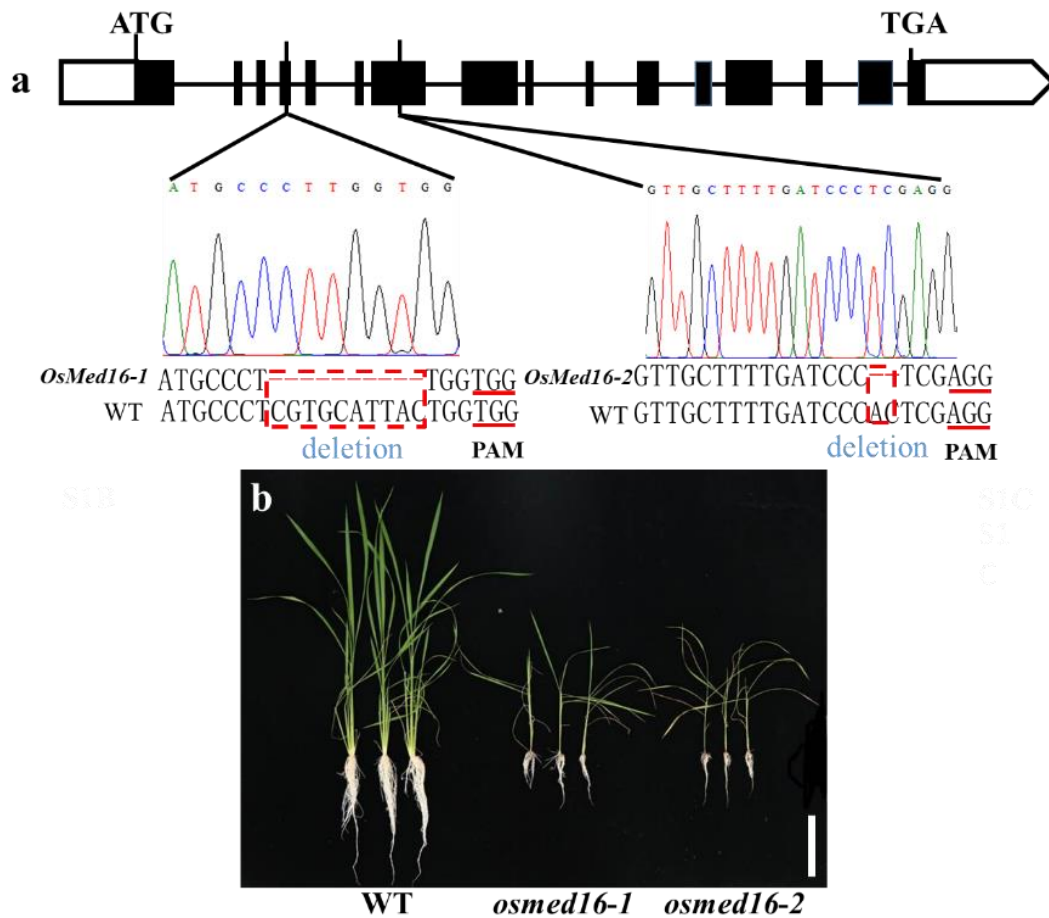

**Figure S2. Knockout of *OsMed16* using CRISPR technology that causes rice seedling lethality. (a)** The two target site mutations of *OsMed16* gene. The black inverted triangle indicates the positions of the two targets; The red dashed box is positioned at the mutation site of the mutants. **(b)** The phenotype of the wild type and two *OsMed16* knockout lines of 48-d-old seedlings. Scale bars = 10 cm. WT, wild type.

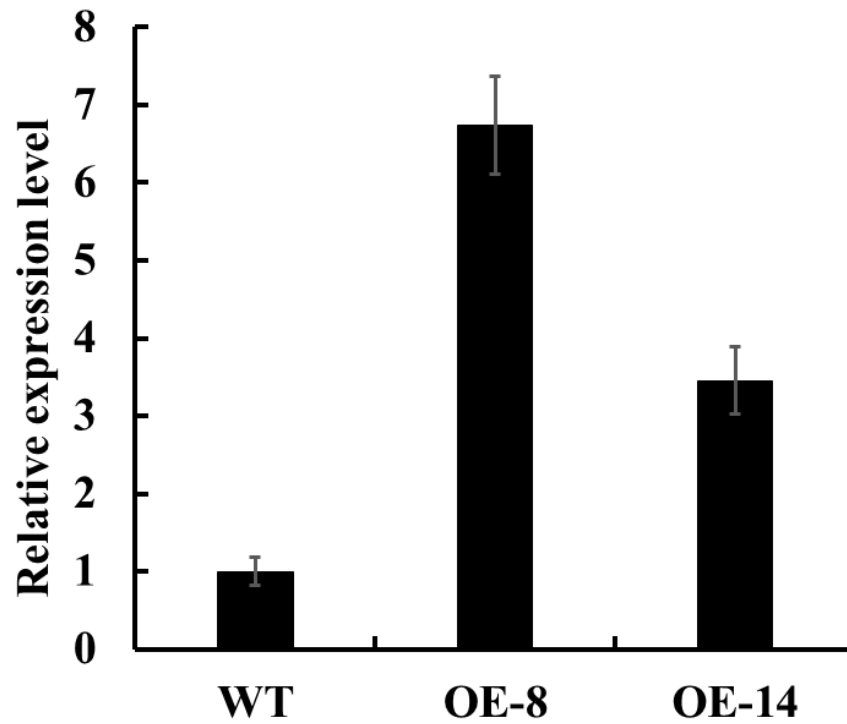

**Figure S3. Detection of the levels of expression of *OsMed16* in wild type and transgenic plants using qRT-PCR.** RNA was extracted from the roots of seedlings. The expression of rice *ACTIN* was used as the internal control. qRT-PCR, quantitative real time PCR; WT, wild type.

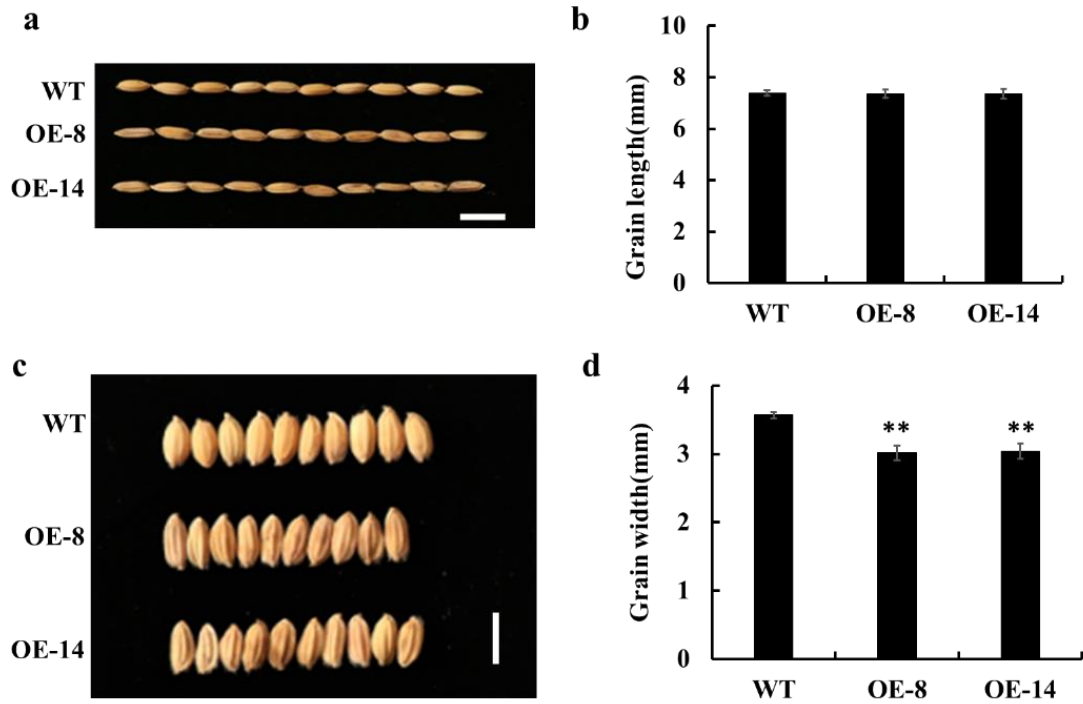

**Figure S4. Grain shape of *OsMed16* overexpression plants.** Comparisons of grain length (**a** and **b**) and grain width (**c** and **d**) between the wild type and *OsMed16*-OE plants. Scale bars = 5 mm. Data (**c** and **d**) are the means  $\pm$  SD of three biological replicates. \* $P < 0.05$ . \*\* $P < 0.01$ .

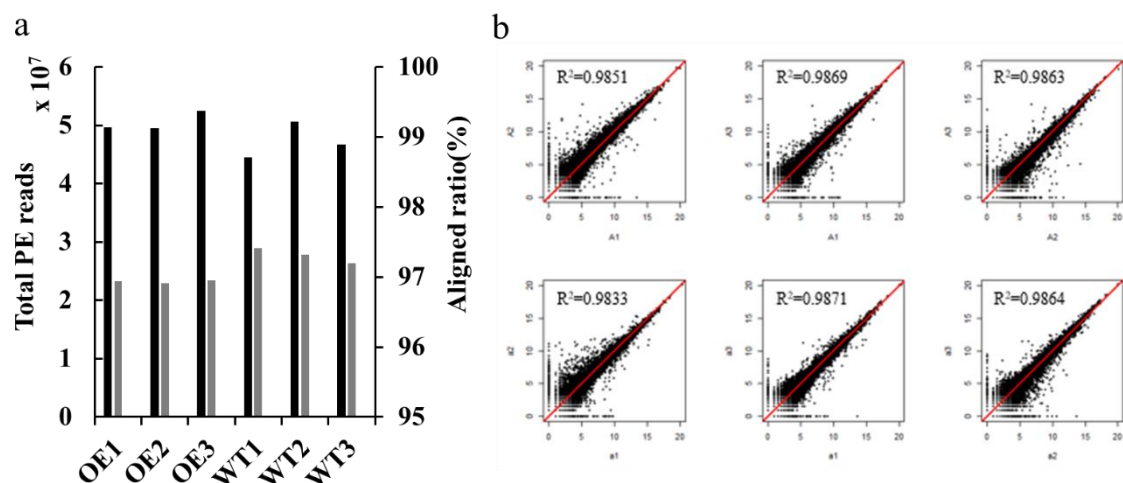

**Figure S5. Basic statistics of the RNA-Seq data.** (a) Statistics of total paired-end reads (black bar) and aligned ratio (gray bar) for each replicate. (b) Consistency of samples and replicates.

**Table S1.** Primers used for defense-related genes.

| Gene name       | Forward primer (5'-3') | Reverse primer (5'-3')   |
|-----------------|------------------------|--------------------------|
| <i>OsPR1a</i>   | CGTGTCGGCGTGGGTGT      | GGCGAGTAGTTGCAGGTGATG    |
| <i>OsPR1b</i>   | TACGCCAGCCAGAGAAGC     | GCCGAACCCCAGAAGAGG       |
| <i>OsPR10a</i>  | GTCCGGGCACCATCTACACC   | CAAGCTTCGTCTCCGTCGAGT    |
| <i>OsNLS</i>    | GAAGACCACCCTTGCCAATCA  | GCTTGTTGATGATGGCTTGC     |
| <i>OsMPK3</i>   | CACCTCGACCACGAGAACATCA | GGCAGTGCTCTTCTGACAGTTC   |
| <i>OsWRKY45</i> | GCCGACGACCAGCACGATCACC | AGGCTGCTCAGCACCTCCTCCT   |
| <i>PDI</i>      | CGTCGAGTTCTACGCCCCGT   | CCTGAATGTTCTTGCCCTGGTTCC |
| <i>OsPAL1</i>   | TTCGACGCCAACATCCTCG    | GCTTCAGCTTGTGGGTCAGGT    |
