# Supplementary material for: Overexpression of OsMed16 Inhibits the Growth of Rice and Causes Spontaneous Cell Death
Source: Genes (Basel). 2021 Apr 27;12(5):656. doi: 10.3390/genes12050656 (PMC8145620; doi:10.3390/genes12050656)
Supplement: Supplementary file 1 [file genes-12-00656-s001.zip › Table S2.xlsx]

## Sheet: Avsa_deg_up
Table S2. Compared with the wildtype, 1419 genes were upregulated in OsMed16-OE plant leaves
Gene_id	OE	WT	Log2FoldChange	P-value	Gene_description
novel.409	3733.48	11.4061	8.36733	1.5e-151	-
4331303	3291.96	88.2658	5.21803	1.45e-129	supported by CI419799 and CI646887
4325422	7558.09	320.612	4.55802	1.31e-117	supported by AK107926
4329724	2000.09	27.9853	6.15371	3.81e-111	supported by AK068310
4342731	5650.14	546.489	3.3697	1.13e-109	supported by AK065971
4328976	1076.39	17.9806	5.90372	3.75e-103	ab initio prediction with EST support
4342223	1940.36	339.701	2.51398	3.94e-102	supported by AK066728
4351185	1414.58	10.3473	7.10816	4.93e-96	supported by AK067962
4335090	2221.57	131.085	4.08209	1.99e-95	supported by AY530101
4348767	37810.4	2115.36	4.15967	7.51e-89	supported by AK064310
4331443	765.778	47.2233	4.01907	7.56e-72	supported by AK068438
4327730	1013.02	68.7588	3.87846	2.76e-70	supported by AK065988
4341343	1646.66	136.968	3.58749	1.2e-69	supported by AY579214
4325163	746.577	73.197	3.35498	1.56e-62	supported by CI410906 and CI639721
4345985	614.049	10.5488	5.86055	7.91e-61	supported by AF488521
4342288	1108.84	109.337	3.34347	1.18e-57	supported by AK102508
4338208	7388	608.565	3.60111	2.83e-57	supported by AK062114
9271499	981.785	60.9021	4.00782	1.02e-51	supported by CI431494 and CI656334
4351146	1019.93	40.9727	4.63443	2.01e-51	supported by AK065631
4336628	537.43	66.4566	3.017	9.64e-51	supported by AK101107
4341818	464.482	42.1731	3.45889	1.19e-50	supported by CI408566 and CI637662
4326065	544.382	55.055	3.31016	2.36e-50	supported by AK058891
4348646	383.57	10.2678	5.22731	2.47e-49	supported by AK103834
4351213	51953.3	12897.2	2.01017	7.83e-48	supported by U43529
9272070	394.36	4.1386	6.54561	6.64e-47	ab initio prediction with EST support
9271931	1159.82	174.753	2.73061	4.84e-46	supported by AK063523
4341447	643.535	20.3893	4.97845	1.75e-44	supported by CI544445 and CI761306
4329726	864.784	35.2381	4.6173	1.01e-43	supported by AK070167
4350822	466.254	46.575	3.3191	3.19e-42	supported by AK063234
4347344	925.806	105.502	3.13243	5.16e-42	supported by AK120390
9268091	4352	1183.54	1.87849	6.67e-42	supported by AK064899
novel.1077	454.067	70.9134	2.67988	8.44e-42	PF13359:DDE superfamily endonuclease
4325325	495.933	23.0212	4.43163	1.48e-41	supported by AK070448
4348478	2591.18	1.01418	11.26	2.06e-40	ab initio prediction with EST support
4329722	456.578	2.79383	7.34005	2.49e-40	supported by AK069701
4329723	341.626	4.49399	6.22521	8.53e-40	supported by AK105913
4335019	1553.41	279.208	2.47674	4.74e-39	supported by AK103013
4341584	650.824	167.237	1.96066	5.04e-39	supported by AK072921
4327861	715.586	167.118	2.09709	2.08e-38	supported by AK072283
9267866	563.64	69.7946	3.01388	3.34e-38	Non-protein coding transcript%2C putative npRNA~supported by AK121553
4351079	475.323	74.6712	2.67191	7.13e-38	ab initio prediction with EST support
novel.367	570.596	74.5399	2.9347	1.23e-37	PF13821:Domain of unknown function (DUF4187)
4349267	2902.18	418.536	2.79283	6.24e-36	supported by AK070067
4345338	3279.59	1187.81	1.46529	1.07e-35	supported by AK099939
4343149	750.432	228.877	1.71275	1.87e-35	supported by AK073856
4352852	10547.5	1863.61	2.5005	2.4e-35	supported by X68197
4327538	867.683	207.463	2.06483	4.81e-35	ab initio prediction with EST support
4342115	6732.09	851.489	2.98285	5.13e-35	supported by AK061042
4325646	421.574	2.08544	7.63966	2.54e-34	supported by AK110723
9268662	2464.98	299.945	3.03869	1.68e-33	supported by AK067257
4324554	2798.9	659.166	2.08589	2.12e-33	supported by AK104420
9268385	459.463	104.553	2.13704	3.08e-33	Non-protein coding transcript%2C uncharacterized transcript~supported by CI407715 and CI637117
4335108	247.632	19.8049	3.64641	1.38e-32	supported by AK064021
4345994	904.617	230.98	1.9706	2.18e-32	supported by AK066825
4335218	2717.19	825.307	1.71862	5.97e-32	supported by AK059943
4347510	334.139	26.4386	3.66793	8.52e-32	supported by AK106533
4344509	637.809	85.4101	2.89822	8.59e-32	supported by AK105866
4352835	1382.14	182.518	2.92198	1.17e-31	ab initio prediction with EST support
9269278	292.365	45.0932	2.69601	1.72e-31	Non-protein coding transcript%2C unclassifiable transcript~supported by AK107752
4326893	4535.94	1001.36	2.17973	2.13e-31	supported by AK102809
4330531	778.589	230.279	1.75669	2.19e-31	supported by CI563056 and CI778482
4352891	271.865	20.7174	3.712	2.39e-31	supported by AK106721
9270424	211.909	22.4524	3.23483	6.62e-31	supported by CI450740 and CI672924
9271851	270.266	40.5272	2.73657	6.9e-31	supported by CI439105 and CI662789
4335096	202.903	9.4974	4.41597	8.81e-31	supported by AK071546
4331398	2513.93	0	13.6567	3.93e-30	supported by AK102606
4324717	10828.8	3952.13	1.45416	5.39e-30	supported by AK099646
4325704	1976.04	530.779	1.89659	9.84e-30	supported by AK063796
novel.1351	811.651	1.02658	9.58533	1.57e-29	-
4349989	5578.01	1579.18	1.82052	1.67e-29	supported by AK068003
4340123	2532.3	699.941	1.85477	1.8e-29	supported by AK120956
4341883	1425.57	363.598	1.97161	2e-29	supported by AK069702
4333841	436.991	95.9437	2.18572	3.77e-29	supported by U28047
4346194	1050.33	383.747	1.45269	4.36e-29	supported by CI410842 and CI639661
4333062	353.331	40.2146	3.13112	6.2e-29	supported by AK100334
4352123	221.749	7.45409	4.90241	6.87e-29	ab initio prediction with EST support
4335729	690.297	144.636	2.25245	7.84e-29	supported by AK119883
4344198	606.947	49.7692	3.60672	1.51e-28	supported by AK107619
4340502	479.771	81.7208	2.55268	1.63e-28	supported by AK108491
9269280	289.3	8.46335	5.09552	4.47e-28	ab initio prediction with EST support
4329339	43501.2	15633	1.47646	4.71e-28	supported by AK119670
4344567	6098.23	1293.15	2.23757	4.76e-28	supported by AK102015
4348633	884.605	87.2931	3.34072	7.15e-28	supported by AK059767
4334717	1248.57	330.195	1.9187	7.35e-28	supported by AK069311
4339387	399.224	107.064	1.89798	8.04e-28	supported by CI045352 and CI303162
4352488	1206.43	134.651	3.16314	1.44e-27	supported by AK070762
9268589	401.964	1.37704	8.15629	1.86e-27	supported by CI403341 and CI633312
novel.666	176.049	4.28755	5.37709	3.63e-27	-
4343748	306.394	67.9309	2.17266	6.76e-27	supported by AK071404
4335899	439.112	85.6697	2.35915	1.75e-26	supported by AK068521
4343397	581.318	135.366	2.10247	1.76e-26	ab initio prediction with EST support
4328533	862.181	235.095	1.87508	2.86e-26	supported by AK068907
4351955	173.011	7.47651	4.54243	7.19e-26	supported by AK071840
4343496	495.228	131.868	1.90666	8.75e-26	ab initio prediction with EST support
4352248	549.18	1.04645	9.0214	1.02e-25	supported by AK072461
novel.638	172.252	14.4585	3.57431	1.28e-25	-
4345385	7212.52	2052	1.81324	2.08e-25	ab initio prediction with EST support
4332289	3496.98	799.204	2.12965	2.38e-25	supported by AK067479
4333649	1124.31	201.423	2.47897	3.23e-25	supported by U77656
4352495	519.788	156.484	1.73196	3.38e-25	supported by AK102354
4351946	327.551	63.2108	2.3723	4.03e-25	supported by AK121788
4334792	2100.09	729.679	1.52536	4.19e-25	ab initio prediction with EST support
4324771	1367.22	373.074	1.87355	5.23e-25	supported by AK121856
4333955	384.714	104.33	1.88053	1.78e-24	supported by CI387556 and CI621209
4348974	1897.39	835.263	1.18337	2.04e-24	supported by AK100816
4333075	2522.83	894.389	1.49573	2.21e-24	supported by AK069583
4337238	1734.43	339.482	2.3535	2.62e-24	supported by AK106059
4337476	1425.09	558.967	1.34966	3.07e-24	supported by AK073929
4352487	8335.28	444.242	4.22978	4.73e-24	supported by AK061606
4336983	6694.63	2473.74	1.43631	8.25e-24	supported by AK102306
4324065	1143.43	360.815	1.66407	8.59e-24	supported by AK106292
4348741	4709.37	1638.14	1.52336	1.02e-23	supported by AK069054
4347942	5814.94	1446.44	2.00736	1.17e-23	supported by AK072954
4342417	171.978	23.9784	2.84228	1.59e-23	supported by CI528212 and CI745806
4334114	1265.69	383.729	1.72065	1.61e-23	supported by AK065044
4331833	321.02	41.8366	2.9423	1.82e-23	supported by AK073589
9269656	196.197	32.3175	2.5987	2.16e-23	Non-protein coding transcript%2C unclassifiable transcript~supported by CI468381 and CI689287
novel.1234	175.42	23.1309	2.91781	2.43e-23	-
4335749	583.798	73.5286	2.9885	3.4e-23	supported by AK110700
novel.1500	370.082	72.029	2.36214	5.63e-23	-
9272556	137.956	8.717	3.97248	6.12e-23	supported by CI392475 and CI625141
4343798	473.346	99.4198	2.25292	6.25e-23	supported by AK120815
4326969	570.301	5.69686	6.6517	2.23e-22	supported by AK070715
4348524	3216.4	1265.2	1.34628	2.59e-22	supported by AB007405
4334701	1624.25	581.78	1.48124	2.68e-22	supported by AK121063
4335176	746.125	201.094	1.89014	3.11e-22	supported by AK100406
4344419	497.411	104.035	2.25967	3.46e-22	supported by AK106547
4336556	313.613	30.8457	3.34831	3.54e-22	ab initio prediction with EST support
4342343	6364.21	2926.35	1.12072	4.42e-22	supported by AK120257
4344422	2906.53	1120.84	1.37455	5.35e-22	supported by AK120555
4351197	126.179	5.74153	4.47773	6.32e-22	supported by AK102505
4335091	290.211	23.4665	3.62469	6.8e-22	supported by AK071864
4352918	446.913	126.148	1.82437	8.26e-22	supported by AK122084
4329721	153.643	4.98355	4.95697	1.12e-21	supported by AK059010
4328707	343.275	92.5958	1.88777	1.58e-21	ab initio prediction with EST support
4338757	298.959	40.2561	2.89271	3.76e-21	ab initio prediction with EST support
4343728	22489.6	9322.63	1.27044	5.04e-21	supported by AF416867
4334956	1977.53	870.645	1.18367	5.05e-21	ab initio prediction with EST support
4332079	16877.2	7051.37	1.25907	5.77e-21	supported by AK069202
4347319	46158.6	18831.9	1.29342	6.02e-21	supported by AK099489
4335304	328.853	87.1217	1.91721	6.5e-21	supported by AK119900
4325479	626.533	159.528	1.97198	8.07e-21	supported by AK065008
4341395	315.721	27.8755	3.50237	9.73e-21	supported by AK063903
4349956	1153.57	373.444	1.62688	9.95e-21	supported by AK068348
4327535	15965.1	6580.62	1.27862	1.12e-20	supported by AK061770
4349021	7545.27	2156.2	1.8071	1.66e-20	supported by AK101061
4328903	465.458	0	11.2232	1.8e-20	supported by AB028131
4335990	397.324	133.388	1.5748	2.02e-20	supported by AK100347
4334015	3382.07	75.6029	5.48346	2.1e-20	supported by AK105387
4333365	241.469	12.7981	4.24324	2.39e-20	supported by AK111441
4331939	2123.39	932.877	1.18649	2.71e-20	supported by CI435386 and CI659812
4344858	24053.8	10936.8	1.13708	2.77e-20	supported by AK066092
9272447	583.012	4.93633	6.88429	3.55e-20	supported by CI440684 and CI664161
4329661	1411.04	580.564	1.28059	3.99e-20	supported by AK103125
4347259	858.047	233.19	1.8801	4.53e-20	supported by AK061433
4344023	1581.02	726.376	1.12195	7.08e-20	supported by CI434094 and CI658685
4341069	1768.12	797.512	1.14836	7.33e-20	supported by AK065872
4324068	184.668	34.2536	2.4319	8.21e-20	supported by AB051108
4337254	3241.96	1452.9	1.15811	8.48e-20	supported by AK103700
4345541	2921.85	1132.21	1.36766	9.35e-20	supported by AK068312
4326220	245.216	49.5768	2.30844	1.15e-19	supported by AK064351
novel.882	140.531	1.73498	6.31909	1.36e-19	PF02365:No apical meristem (NAM) protein
4349187	436.111	85.2543	2.35738	1.86e-19	supported by AK108376
4349689	145.61	4.61067	4.98735	2.17e-19	supported by CI443396 and CI666341
4347145	1238.06	469.533	1.39804	3.14e-19	supported by CI337070 and CI583622
4324469	2782.32	1162	1.25999	3.57e-19	supported by AK108889
4349424	159.94	17.7716	3.17475	4.16e-19	supported by AK109895
4351005	136.692	1.75977	6.2784	6.17e-19	supported by AK103094
4340344	3570.59	1553.3	1.20081	9.15e-19	supported by AK066243
4352474	908.4	232.829	1.9626	1.32e-18	supported by AK069589
4352268	145.106	6.07212	4.58936	1.85e-18	ab initio prediction with EST support
9268132	1404.18	464.32	1.5961	2.36e-18	supported by CI410023 and CI638929
4347321	3027.09	1411.89	1.10046	2.84e-18	supported by AK066610
4351131	457.384	76.486	2.57868	3.19e-18	supported by AK069082
4325760	1199.5	534.467	1.16609	3.69e-18	supported by AK072758
4342895	625.324	263.804	1.24455	3.96e-18	supported by AK069636
4347125	305.381	68.862	2.1514	4.45e-18	supported by AK110224
4348634	182.07	21.7906	3.07132	4.89e-18	supported by AK060033
4324791	547.056	129.44	2.08142	5.1e-18	supported by AK068115
4329730	117.141	3.82789	4.92144	5.58e-18	supported by AK101003
9268533	187.255	42.1455	2.14935	6.23e-18	supported by CI395136 and CI626344
4339973	2995.18	1164.69	1.3627	7.2e-18	supported by AK100186
4348138	720.775	260.121	1.47073	9.41e-18	supported by AK121800
4337878	954.552	359.853	1.40717	1.42e-17	supported by AK067837
4344448	1703.72	617.226	1.46448	1.81e-17	supported by AK067200
4349520	2824.51	1049.46	1.42837	1.96e-17	supported by AK070459
9266455	1367.16	486.317	1.49092	2.56e-17	supported by AK099582
4325695	4608.87	2116.78	1.12265	2.86e-17	supported by AK064849
9272328	127.653	17.0186	2.9129	3.68e-17	supported by CI399157 and CI629493
4336039	132.725	16.8671	2.97429	4.03e-17	supported by AK106058
novel.1039	227.698	0	10.1921	4.72e-17	PF00098:Zinc knuckle|PF14223:gag-polypeptide of LTR copia-type|PF00665:Integrase core domain|PF13976:GAG-pre-integrase domain
4332788	1895.08	846.015	1.16391	4.95e-17	supported by AK102158
4330160	596.001	124.979	2.25407	5.28e-17	supported by AK066861
4332495	2389.91	1116.74	1.09735	5.31e-17	supported by D82036
4332251	1333.64	603.21	1.14461	6.49e-17	supported by AK070050
4334985	234.556	47.0988	2.31852	7.94e-17	supported by AK121671
4326766	862.734	303.757	1.50571	8.04e-17	supported by AK071611
4338950	563.912	146.029	1.94884	1.03e-16	supported by AK072154
4342734	373.575	0.35046	9.9454	1.19e-16	supported by AK108382
4333823	576.575	219.063	1.39665	1.21e-16	supported by AK072869
4327325	102.75	2.47564	5.37963	1.41e-16	supported by AK102964
4337089	442.805	156.851	1.49801	1.54e-16	supported by AK102284
4325621	5420.61	2346.06	1.20831	1.59e-16	supported by AK103586
4348722	456.787	133.795	1.77138	2.38e-16	supported by AK067591
4328263	180.279	31.5194	2.51776	2.4e-16	ab initio prediction with EST support
4327651	253.015	73.7964	1.77911	3e-16	supported by AK108522
4340199	1015.86	457.595	1.15083	3.14e-16	supported by AK068486
4338260	198.809	0	9.99633	3.31e-16	supported by CI420729 and CI647738
9269935	1111.51	436.764	1.34843	3.45e-16	supported by AK068691
4325253	817.067	284.475	1.52246	3.72e-16	supported by AK061229
4333077	1148.34	550.429	1.06099	3.87e-16	supported by CI563296 and CI778700
4344999	440.887	124.84	1.82078	4.13e-16	supported by AK059812
4335092	145.663	10.2778	3.82891	4.21e-16	supported by CI027926 and CI295614
4346445	351.772	104.553	1.74976	4.69e-16	supported by AK099466
4335093	128.134	3.87748	5.04685	6.03e-16	supported by AK103462
4352286	405.25	95.4746	2.08264	6.46e-16	supported by AK069916
9268868	212.394	20.1798	3.40673	7.71e-16	ab initio prediction with EST support
4338203	495.418	99.4111	2.3206	9.04e-16	supported by AK104978
4329001	628.098	206.003	1.60829	9.69e-16	supported by AK071664
4351147	151.286	7.68057	4.29255	9.77e-16	supported by AK070289
4341948	914.332	318.9	1.52024	9.92e-16	supported by CI367540 and CI606282
4335169	1066.5	493.718	1.11081	1.12e-15	supported by AK103242
4344210	5705.87	2804.77	1.02444	1.18e-15	supported by CI470913 and CI691684
4329427	333.248	92.3739	1.84956	1.26e-15	supported by AK100163
9270027	682.862	240.156	1.50788	1.41e-15	supported by CI476120 and CI696850
4352110	1720.71	787.303	1.12795	1.46e-15	supported by AK065546
4329572	4420.93	1350.11	1.71114	1.52e-15	supported by AK073251
4328678	532.094	162.832	1.70846	1.64e-15	supported by CI367524 and CI606261
4335099	300.758	89.0883	1.7526	1.67e-15	supported by AK067970
4352691	490.647	133.311	1.88066	1.68e-15	supported by AK121185
4346656	322.982	99.6545	1.6956	1.89e-15	supported by AK073146
9270740	165.63	22.8744	2.86463	2.21e-15	supported by CI496324 and CI715787
4330274	3918.91	1886.61	1.05454	2.48e-15	supported by AK100650
4336146	1236.87	519.832	1.25026	2.56e-15	supported by AK070962
4348533	356.098	66.9968	2.40663	2.92e-15	supported by AK061602
4345515	166.447	27.5471	2.60365	3.36e-15	supported by AK108881
4343501	363.125	116.07	1.6468	3.44e-15	supported by AK111550
9270758	361.584	133.18	1.43973	3.47e-15	supported by AK120998
4348441	139.449	0	9.48471	4.17e-15	supported by AK063055
9269851	142.331	0	9.51514	4.27e-15	supported by CI429161 and CI654559
4345993	603.455	224.347	1.42837	4.37e-15	supported by D14000
4329546	308.257	117.836	1.38795	4.4e-15	supported by AK102681
novel.711	145.027	0	9.54048	4.56e-15	-
4337017	155.812	6.87987	4.52069	4.78e-15	ab initio prediction with EST support
4338934	472.468	82.6873	2.5151	4.93e-15	supported by AK102658
4340986	1626.16	708.098	1.19996	4.99e-15	supported by AK066934
novel.402	96.944	5.396	4.18737	5.12e-15	PF13966:zinc-binding in reverse transcriptase
9269098	137.096	0	9.46002	5.67e-15	Non-protein coding transcript%2C unclassifiable transcript~supported by CI429073 and CI654500
4333648	1917.7	98.7977	4.27902	6.16e-15	supported by AK102970
4343412	1124.88	352.278	1.67535	6.21e-15	supported by AK105311
4330656	184.774	40.127	2.20297	7.42e-15	supported by AK099700
4336476	408.416	137.789	1.56509	7.48e-15	supported by AK069679
4352706	1736.67	820.648	1.08139	7.82e-15	supported by AK103799
4335330	285.216	82.7381	1.78259	8.43e-15	supported by AK069447
4351260	320.996	96.8877	1.72799	8.87e-15	supported by AK107297
4332684	204.292	44.8843	2.1873	1.08e-14	supported by AK062978
4339639	5466.58	2460.99	1.15146	1.2e-14	supported by D32144
4328223	1080.2	423.161	1.35205	1.36e-14	supported by AF194416
4340095	1777.94	660.775	1.42751	1.37e-14	supported by AK067270
9271293	723	341.512	1.08109	1.44e-14	supported by AK066950
4335106	339.293	99.568	1.76609	1.7e-14	ab initio prediction with EST support
4325937	2101.45	725.109	1.53543	1.88e-14	supported by CI546546 and CI763281
novel.393	139.875	0	9.49064	1.9e-14	PF14223:gag-polypeptide of LTR copia-type|PF00098:Zinc knuckle|PF13976:GAG-pre-integrase domain
4347975	939.059	433.267	1.1155	1.92e-14	supported by AK105108
4333499	1740.82	461.805	1.91501	1.96e-14	ab initio prediction with EST support
4324117	978.573	393.232	1.31446	1.99e-14	supported by AK106178
4348838	9443.49	4330.81	1.12457	2.03e-14	supported by AK067249
4340462	233.389	70.0289	1.73562	2.06e-14	supported by AK103188
4343495	294.509	95.1108	1.63088	2.25e-14	ab initio prediction with EST support
4328139	3413.45	1672.3	1.02953	2.51e-14	supported by AK070168
4335707	578.045	106.343	2.44404	2.82e-14	supported by AK101501
4335390	102.443	2.11771	5.59901	3.48e-14	supported by CI446734 and CI669340
4330667	429.367	158.265	1.43849	3.49e-14	supported by AK099698
4326724	243.273	60.9337	1.99726	4.09e-14	supported by AK109883
4325463	388.417	108.351	1.8412	4.29e-14	supported by AK120731
4338914	2027.82	998.893	1.02177	4.57e-14	supported by AK071586
9271991	2312.41	797.463	1.53625	4.81e-14	supported by AK069626
4339897	351.029	139.227	1.33407	5.21e-14	supported by AK061381
4345576	4493.58	1875.34	1.26089	6.17e-14	supported by AF145729
4348371	133.791	23.9583	2.48063	6.61e-14	supported by AK120994
4323880	16498.9	6454.42	1.35404	9.04e-14	supported by CI041749 and CI301846
4326760	814.134	309.17	1.397	9.11e-14	supported by AY676928
9271617	375.559	87.0175	2.10821	9.2e-14	ab initio prediction with EST support
4352482	84.4153	3.53449	4.58247	9.73e-14	supported by AK069357
4349814	249.598	50.4125	2.30669	1.04e-13	supported by AK106277
novel.944	475.979	0	11.256	1.07e-13	PF03732:Retrotransposon gag protein
4352160	153.739	7.1111	4.44021	1.19e-13	supported by AK100592
novel.53	117.708	18.9799	2.63004	1.2e-13	PF00931:NB-ARC domain
4351119	109.802	15.5075	2.82245	1.24e-13	supported by AK120619
novel.526	106.01	0	9.09009	1.27e-13	-
4336407	280.784	66.4968	2.07509	1.3e-13	supported by Y11414
4332059	345.454	114.612	1.59236	1.32e-13	supported by AK070981
4324540	113.27	13.929	3.0319	1.34e-13	supported by AK069247
4349238	1562.69	569.977	1.45484	1.39e-13	supported by AK061357
4345590	1388.85	584.21	1.24872	1.41e-13	ab initio prediction with EST support
4338548	109.741	19.0991	2.52517	1.51e-13	supported by CI519553 and CI737764
4325103	3018.5	1281.3	1.2363	1.51e-13	supported by AK100403
4337108	320.225	98.8487	1.69598	1.72e-13	supported by AF403126
4330759	1705.26	814.712	1.0655	1.73e-13	supported by AK101787
4347172	5367.05	2274.44	1.23878	1.75e-13	supported by AK119560
4351217	437.526	176.478	1.30891	1.75e-13	supported by AK102199
4347661	3052.54	1520.07	1.00596	1.9e-13	supported by AK120444
4333508	97.6168	0	8.97024	1.91e-13	supported by AK071513
4333339	121.506	23.6352	2.36275	2.05e-13	supported by AK101987
9270995	133.019	26.2698	2.34374	2.08e-13	supported by AK064110
9268999	112.643	0	9.17646	2.22e-13	Non-protein coding transcript%2C unclassifiable transcript~supported by CI435248 and CI659683
4348721	158.446	0.708393	7.81231	2.41e-13	ab initio prediction with EST support
4339265	1033.67	447.28	1.20768	2.55e-13	ab initio prediction with EST support
4327838	686.446	300.273	1.19257	2.62e-13	supported by AK064375
9266182	99.3922	0	8.99634	2.64e-13	ab initio prediction with EST support
9267416	302.34	106.561	1.50499	3.08e-13	ab initio prediction with EST support
4336728	808.196	270.199	1.58158	3.86e-13	supported by AK101618
4346024	76.0442	4.94873	3.94396	3.87e-13	ab initio prediction with EST support
4337206	2103.85	980.082	1.10216	3.87e-13	supported by AK065350
9266598	419.695	181.738	1.20826	4.14e-13	supported by CI544409 and CI761272
4330998	8083.96	3687.36	1.13254	4.33e-13	supported by AK058513
4335817	708.136	288.052	1.29746	4.44e-13	supported by AK121255
4342911	807.054	357.039	1.1772	4.49e-13	supported by CI443404 and CI666347
4327894	897.233	388.229	1.20923	4.68e-13	supported by AK071643
4327545	223.944	75.7325	1.56622	4.79e-13	supported by AK105954
4323921	579.079	245.188	1.24103	4.92e-13	supported by AK073238
4334577	606.889	238.704	1.34631	4.99e-13	supported by AK121701
4344636	80.2392	2.52778	5.01705	5.41e-13	supported by AK069031
9270657	90.4106	0	8.86075	5.47e-13	ab initio prediction with EST support
9272452	87.6827	0	8.81592	6.17e-13	ab initio prediction with EST support
9270374	92.4801	11.5281	2.99702	6.3e-13	supported by AK121163
4343852	3841.16	1548.85	1.31003	7.49e-13	supported by AK068670
novel.1194	77.5465	1.48133	5.77408	7.71e-13	-
4351775	753.367	295.784	1.349	8.27e-13	supported by AK069105
4331894	9774.3	4698.42	1.0568	8.31e-13	supported by AK066331
4334034	317.598	114.192	1.4766	8.39e-13	supported by AK068443
4338691	1594.38	730.569	1.12616	9.06e-13	supported by AK104407
4352472	7524.38	3336.24	1.17344	9.42e-13	supported by AK066459
4329338	537.283	166.01	1.69589	1.11e-12	supported by AK069003
4338546	1820.09	642.886	1.50097	1.16e-12	supported by AK122156
4329203	829.221	311.327	1.41375	1.17e-12	supported by AK070014
4341530	437.879	177.112	1.30546	1.44e-12	supported by AK119909
4339522	714.712	352.353	1.01951	1.51e-12	ab initio prediction with EST support
novel.207	326.39	111.768	1.5457	1.56e-12	-
4324393	425.113	138.175	1.62198	1.6e-12	supported by AK066286
4326074	2023.73	969.315	1.06153	1.65e-12	supported by AK099387
4338034	195.742	49.5227	1.98027	1.67e-12	supported by AK071798
4344637	248.95	66.6811	1.8981	1.88e-12	ab initio prediction with EST support
4329024	462.381	192.831	1.26051	1.89e-12	supported by AK121583
4332506	2528.17	101.419	4.64064	2.02e-12	supported by CI065076 and CI308331
4326136	1548.27	672.346	1.20387	2.08e-12	supported by AK103194
4336442	405.656	160.513	1.33765	2.24e-12	supported by AK069437
4332499	89.0276	13.0417	2.77146	2.38e-12	supported by AK069008
4335391	103.399	13.5884	2.93676	3.17e-12	supported by AK062593
4328809	661.787	243.416	1.44218	3.36e-12	supported by AK106488
4341979	3936.23	1704.75	1.20717	3.7e-12	supported by AK107735
4344834	2755.82	1298.56	1.08543	3.79e-12	supported by AK060577
4346970	325.657	61.2242	2.41225	4.41e-12	supported by AK065379
4343721	1014.67	442.606	1.19694	4.67e-12	supported by AK121529
4324646	3809.14	1591.94	1.25851	4.68e-12	supported by AK105221
4324583	1842.62	679.447	1.43979	4.74e-12	supported by AK068593
9266310	117.074	14.672	3.00699	5.07e-12	supported by AK121692
4344496	627.589	229.543	1.45176	5.31e-12	supported by AK069503
4352783	654.466	292.651	1.15966	5.32e-12	supported by AK121703
4329544	107.753	15.0776	2.83406	5.78e-12	supported by AK063708
4351076	595.223	267.274	1.1539	6.09e-12	supported by CI409215 and CI638233
4334572	675.098	272.166	1.31085	6.43e-12	supported by AK121940
4328545	1343.65	633.305	1.0851	7e-12	supported by CI002040 and CI285734
4338962	160.718	39.1105	2.03864	7.16e-12	supported by AK108341
4342261	85.7478	7.28034	3.54547	7.23e-12	ab initio prediction with EST support
4347973	130.32	22.3233	2.53953	7.44e-12	supported by AK108480
4326996	8987.89	4230.07	1.08716	7.73e-12	supported by AK071516
4343098	130.351	8.98755	3.87049	8.1e-12	supported by AK073296
4350836	67.5668	2.46817	4.77351	8.28e-12	supported by CI552411 and CI768742
4327950	127.002	30.1001	2.07884	8.87e-12	supported by CI436603 and CI660909
4334013	1104.84	40.2803	4.77872	9.61e-12	supported by AK119903
4351087	932.497	392.924	1.24638	1.02e-11	supported by AK108290
4337676	1774.73	792.285	1.16396	1.03e-11	supported by AK066314
novel.1358	66.0688	0	8.40719	1.11e-11	-
4346068	327.813	99.9152	1.71381	1.29e-11	supported by AB015615
novel.1406	71.1397	7.00189	3.33714	1.48e-11	-
9267552	284.214	108.567	1.38912	1.58e-11	supported by CI441340 and CI664626
4341461	789.425	376.255	1.06971	1.8e-11	supported by AK070134
novel.557	59.4424	1.78712	5.07352	1.83e-11	PF05754:Domain of unknown function (DUF834)
4349395	192.612	46.8388	2.03564	1.86e-11	supported by AY341826
4331929	692.032	269.969	1.35877	1.9e-11	supported by AK070149
4329142	266.535	99.4897	1.42152	2.04e-11	supported by AK068924
4348311	178.872	48.3442	1.88764	2.54e-11	supported by AK106038
4329771	216.884	72.7651	1.57779	2.58e-11	supported by AY177696
4344442	814.442	360.53	1.1761	2.7e-11	supported by AK101575
4342221	355.286	162.097	1.13291	2.8e-11	supported by AK121072
4331964	534.113	138.851	1.94469	2.82e-11	supported by AK066091
4349610	290.666	97.2895	1.58002	2.97e-11	supported by AK073243
4346229	385.458	140.152	1.4591	3.11e-11	supported by AY344484
4328997	4914.69	2352.03	1.06334	3.93e-11	supported by AK073294
4335698	74.6064	8.06822	3.20495	4.23e-11	supported by AK107750
4348860	422.161	173.427	1.28174	4.25e-11	supported by AK121166
4335868	1215.74	503.886	1.27113	4.26e-11	supported by AK106337
4333001	94.3566	14.2993	2.73175	4.44e-11	supported by AK107546
4337600	581.824	271.635	1.09732	4.5e-11	supported by AK108350
4339739	208.644	59.2885	1.813	4.74e-11	supported by AY341857
4340108	111.662	19.9642	2.47921	4.77e-11	supported by AK106249
4328720	259.452	93.8372	1.46857	5.43e-11	supported by AK064000
4347891	195.191	60.8444	1.68043	5.84e-11	supported by AK061415
4344290	1635.34	608.164	1.42734	6.37e-11	supported by AK099229
4330864	214.902	0.740663	8.2368	6.67e-11	ab initio prediction with EST support
4333112	125.479	25.0545	2.32525	6.77e-11	supported by AK064733
4324533	69.8478	6.41766	3.45337	7.44e-11	ab initio prediction with EST support
4342003	86.785	7.3797	3.55469	7.5e-11	supported by AK062667
9266101	631.653	226.219	1.48134	7.6e-11	Non-protein coding transcript%2C putative npRNA~supported by AK107176
4351911	291.289	3.19388	6.51451	8.09e-11	supported by CI522488 and CI740464
9272151	56.0509	0	8.16827	8.37e-11	ab initio prediction with EST support
4339274	808.36	281.284	1.52375	8.65e-11	supported by AK068958
4335021	437.59	164.809	1.40763	8.96e-11	supported by AK062765
9269861	221.601	32.6696	2.76819	9.3e-11	supported by CI560562 and CI776192
4343573	502.384	180.317	1.47894	9.5e-11	supported by AK102045
4351628	128.419	30.9852	2.04894	9.51e-11	supported by AK059809
novel.240	92.6598	0.370331	7.93316	9.67e-11	-
4332347	900.434	355.706	1.34057	9.74e-11	supported by AK101498
4332954	130.613	33.217	1.97549	9.87e-11	supported by AK107064
9268705	194.397	63.3873	1.61565	1.01e-10	supported by CI527806 and CI745435
9268196	850.987	416.964	1.02897	1.02e-10	supported by AK103482
4327178	4534.6	2160.44	1.06973	1.05e-10	supported by AK068523
4326079	688.46	251.758	1.45185	1.06e-10	supported by AK070385
4338718	85.2055	1.02658	6.34093	1.07e-10	supported by U02286
4347860	1563.89	663.631	1.23697	1.08e-10	supported by AK108733
4331910	216.865	50.6412	2.0962	1.14e-10	supported by CI428634 and CI654168
4342813	162.894	47.683	1.77226	1.14e-10	supported by AK064151
4326690	102.864	19.5464	2.40016	1.18e-10	supported by AK108745
4347998	77.2279	8.74927	3.13598	1.19e-10	ab initio prediction with EST support
4341900	501.736	227.12	1.14323	1.22e-10	supported by CI548936 and CI765478
4341290	1248.77	588.603	1.08426	1.28e-10	supported by AK111851
4330084	364.199	174.841	1.05793	1.3e-10	supported by AK063955
4344940	104.285	9.55192	3.45043	1.48e-10	supported by AK106835
9271916	353.652	132.194	1.42039	1.51e-10	supported by AK065100
4326293	116.81	11.0258	3.41136	1.52e-10	supported by CI078025 and CI311722
9272509	769.408	347.876	1.14524	1.72e-10	supported by AK111635
4340274	656.642	324.707	1.01662	1.74e-10	supported by CI423297 and CI649986
4342824	600.828	158.468	1.9241	1.88e-10	supported by AK100710
4330552	308.384	71.9203	2.10015	1.95e-10	supported by AK101967
4341803	125.587	35.852	1.80647	2.04e-10	supported by AK070966
4337588	1344.21	622.218	1.11101	2.13e-10	supported by AK071038
4345061	1378.24	554.096	1.31473	2.2e-10	supported by AK060251
4324793	876.407	323.414	1.4391	2.22e-10	supported by AK071410
4348727	189.914	50.5036	1.91415	2.24e-10	supported by AK071359
9271601	92.3921	21.8333	2.08122	2.41e-10	supported by CI435307 and CI659733
4332714	842.688	270.074	1.64305	2.48e-10	supported by AK065989
novel.765	60.8745	1.39691	5.4322	2.54e-10	-
4337011	827.452	362.405	1.19038	2.54e-10	supported by AK060820
4333863	1661.75	757.951	1.13289	2.6e-10	supported by AK060138
4351960	214.111	60.1284	1.83186	2.68e-10	supported by CI438345 and CI662228
4343481	265.064	107.039	1.30817	2.73e-10	supported by AK103108
4350502	203.267	23.2773	3.12658	2.85e-10	supported by AB118056
4349246	301.717	93.2088	1.69415	2.86e-10	supported by AK061045
4327429	823.56	407.312	1.01585	2.91e-10	supported by AK105801
4347853	296.684	128.081	1.21143	3.07e-10	supported by AK069278
novel.1552	46.9602	0	7.91508	3.27e-10	-
4348726	144.049	39.2594	1.87578	3.27e-10	supported by AK105860
4349193	588.208	169.135	1.8	3.3e-10	supported by AK102196
4340476	299.094	125.902	1.24759	3.37e-10	supported by AK108107
4346584	148.586	16.3602	3.17742	3.48e-10	supported by AK063844
4348988	2861.28	1332.71	1.10204	3.48e-10	supported by AK068374
4344340	124.946	35.3894	1.82311	3.5e-10	supported by AK106421
4346968	480.675	213.014	1.17309	3.63e-10	supported by AK105580
4344324	4053.31	1454.7	1.47853	3.94e-10	supported by AK073876
4344201	75.7501	11.205	2.75222	3.97e-10	supported by CI011413 and CI289984
4341261	84.071	0.676123	6.90263	3.97e-10	supported by AK109673
4335355	420.004	203.036	1.04921	4.05e-10	supported by AK068009
9268783	782.265	387.917	1.01259	4.96e-10	Non-protein coding transcript%2C unclassifiable transcript~supported by AK058850
4334265	899.452	427.777	1.0725	5.29e-10	supported by AK120949
4346768	1261.61	588.983	1.09877	5.66e-10	supported by AK065265
4349554	152.672	42.6646	1.8396	5.66e-10	supported by CI444008 and CI666851
4334898	244.896	97.0113	1.33732	5.94e-10	supported by AK073860
4344182	1164.25	577.195	1.01216	6.34e-10	supported by AK107202
4336625	374.433	163.921	1.19205	6.38e-10	supported by AK072990
4332228	289.298	66.8879	2.11628	6.8e-10	supported by AK101837
9269571	223.694	59.1397	1.91747	6.99e-10	supported by CI548019 and CI764573
4349050	994.997	467.014	1.09135	7.32e-10	ab initio prediction with EST support
4326664	625.691	281.156	1.15466	7.61e-10	supported by AK060213
novel.303	52.3258	0	8.06897	7.96e-10	-
4344486	134.885	30.4728	2.14758	8.29e-10	supported by AK110905
4324184	656.62	321.848	1.02939	8.43e-10	supported by AK106271
4331523	706.994	325.118	1.12022	8.61e-10	supported by AK073032
9272472	6365.19	3173.73	1.00397	8.83e-10	supported by AK120677
9267088	46.8874	2.87077	4.0488	9.72e-10	supported by AK064050
9268176	61.4971	1.05885	5.86354	9.78e-10	Non-protein coding transcript%2C putative npRNA~supported by AK106645
4332041	193.901	26.4985	2.8722	1.02e-09	supported by AY129294
9268158	68.2238	0.720791	6.59507	1.09e-09	supported by AK111025
4326315	240.988	103.554	1.21779	1.15e-09	supported by AK106333
4341823	432.547	144.418	1.58349	1.26e-09	supported by AK063648
4342598	1397.69	579.674	1.2704	1.37e-09	supported by AK065328
4347443	184.029	55.2018	1.7381	1.43e-09	supported by AK101104
4332487	6663.11	470.197	3.82498	1.5e-09	supported by AK103162
4347919	319.421	105.894	1.59065	1.59e-09	supported by AK062604
4331363	391.25	103.947	1.91527	1.66e-09	supported by CI030188 and CI296464
9268308	56.7049	0	8.18811	1.9e-09	supported by AK103470
4328452	276.114	89.034	1.63025	1.92e-09	supported by AK068418
4339544	158.802	58.3963	1.44211	1.99e-09	ab initio prediction with EST support
4334968	823.605	316.99	1.37827	2.07e-09	supported by AK069299
9272187	144.208	39.1079	1.88388	2.08e-09	supported by AK106480
novel.538	61.2511	4.00911	3.96265	2.2e-09	-
4342208	117.7	34.4252	1.77126	2.23e-09	ab initio prediction with EST support
4333655	134.725	36.9207	1.86591	2.28e-09	supported by CI543152 and CI760045
4352581	70.5708	1.42918	5.64148	2.38e-09	supported by CI543683 and CI760561
4350584	111.125	8.851	3.65274	2.55e-09	supported by CI434885 and CI659382
4334014	425.566	17.5526	4.60258	2.59e-09	supported by AK106537
4325974	1374.58	643.651	1.09449	2.71e-09	supported by AK061853
novel.1488	55.0836	1.01418	5.71291	2.85e-09	-
4349659	105.306	31.3803	1.7471	2.9e-09	supported by CI073491 and CI310606
novel.476	63.5058	8.79156	2.85228	2.98e-09	PF05754:Domain of unknown function (DUF834)
4341300	312.127	124.276	1.32839	3.08e-09	supported by AK069355
4348975	222.883	67.2971	1.72653	3.18e-09	supported by AK063103
4342614	1144.63	84.8162	3.75409	3.19e-09	supported by AK100909
4347126	411.335	186.25	1.14398	3.38e-09	supported by AK073894
4342810	93.2865	16.6388	2.47609	3.46e-09	supported by AK107239
4352620	253.327	109.196	1.21417	3.49e-09	supported by CI349592 and CI592367
4351500	871.232	311.221	1.48526	3.49e-09	supported by AK059860
4332907	153.86	46.3512	1.72868	3.57e-09	supported by AK108428
4329795	111.356	26.3194	2.08546	4.13e-09	supported by AK102380
4352127	233.173	9.89746	4.55945	4.15e-09	supported by AK063833
4348734	417.427	208.486	1.00037	4.33e-09	ab initio prediction with EST support
4333554	1730.67	670.142	1.3693	4.36e-09	supported by AK099445
4338343	1209.73	423.55	1.51475	4.42e-09	supported by AK073649
4328717	209.063	49.4199	2.08537	4.7e-09	supported by AF513384
4346035	990.786	358.76	1.46654	4.9e-09	supported by AK108596
4346529	131.691	23.5484	2.4841	4.9e-09	supported by AK071383
novel.493	54.3529	5.35388	3.3565	4.94e-09	PF00078:Reverse transcriptase (RNA-dependent DNA polymerase)|PF05754:Domain of unknown function (DUF834)
9272362	1508.94	617.134	1.29021	5.21e-09	supported by AK073345
4351361	72.3623	10.7404	2.74087	5.86e-09	supported by AK072782
4341127	221.006	98.4017	1.16567	6.14e-09	supported by AK121505
4337376	765.978	329.849	1.21563	6.3e-09	supported by AK109377
4330538	194.69	40.1914	2.27563	6.35e-09	supported by AK107893
9266328	77.4871	13.4121	2.53101	6.53e-09	supported by AK063052
4349349	60.561	5.20493	3.52712	6.95e-09	supported by AK100959
4336705	266.21	104.533	1.34915	7.1e-09	supported by AK112099
4326646	831.161	92.8227	3.16304	7.23e-09	supported by AJ601438
4346723	266.975	125.822	1.08648	7.24e-09	supported by AK121426
4350583	76.9182	7.17819	3.43575	7.31e-09	ab initio prediction with EST support
4334903	70.0762	7.6483	3.18736	7.57e-09	supported by AK069960
9266189	748.724	219.04	1.77261	7.7e-09	supported by AY602991
9269620	232.427	76.2601	1.60753	7.89e-09	supported by CI387675 and CI621312
4350947	903.301	397.884	1.18329	7.95e-09	supported by CI387727 and CI621350
4332175	63.8724	5.59258	3.50949	7.96e-09	supported by D14482
novel.195	48.7808	1.01418	5.53412	8.29e-09	-
4324725	230.732	63.7588	1.85803	8.35e-09	supported by AK073926
novel.936	81.4517	20.1902	2.01652	8.82e-09	-
4325408	297.712	99.6228	1.58293	8.83e-09	supported by AK062671
4352871	2826	1255.6	1.17067	9.38e-09	supported by AK065955
4324375	582.639	286.056	1.02642	9.5e-09	supported by AK101084
4346079	418.654	176.791	1.24262	9.52e-09	supported by AK106190
9270463	34.7415	0	7.47924	9.69e-09	supported by CI354405 and CI595940
novel.199	52.3782	2.1301	4.62517	9.83e-09	-
4342317	564.765	63.7676	3.14619	1.02e-08	supported by AF251277
4333827	1076.92	499.566	1.10847	1.06e-08	supported by AK099563
4338255	106.278	33.8162	1.6518	1.14e-08	supported by AK072871
novel.134	35.8806	0	7.52857	1.28e-08	-
4342034	223.95	93.5348	1.25749	1.29e-08	supported by AK073326
4327433	68.265	9.43779	2.84744	1.3e-08	supported by AK109023
9266983	51.4283	1.11099	5.59176	1.31e-08	supported by AK108432
4349708	1022.17	500.407	1.03059	1.48e-08	supported by AK064297
4348369	1212.55	570.361	1.08865	1.6e-08	supported by AK069792
4349105	242.249	77.348	1.64742	1.75e-08	supported by AK105773
novel.964	90.3617	7.51133	3.59821	1.85e-08	PF00665:Integrase core domain|PF13976:GAG-pre-integrase domain
4338154	172.701	3.58408	5.59884	1.91e-08	supported by AK064229
4329454	92.2911	18.9224	2.29497	1.93e-08	supported by AK119471
9268833	1175.84	473.663	1.31214	1.93e-08	Non-protein coding transcript%2C unclassifiable transcript~supported by AK062356
novel.237	363.443	98.5001	1.88364	2e-08	-
4332382	471.442	206.227	1.19238	2.04e-08	supported by AK106069
novel.3	109.392	26.9135	2.02647	2.04e-08	PF07714:Protein tyrosine kinase|PF13947:Wall-associated receptor kinase galacturonan-binding|PF14380:Wall-associated receptor kinase C-terminal
4325630	92.9608	17.0558	2.45164	2.06e-08	supported by AK067879
4328844	276.472	133.779	1.04578	2.27e-08	ab initio prediction with EST support
4352491	16608.1	2185.53	2.92582	2.29e-08	supported by D38170
4339484	440.603	190.314	1.20942	2.47e-08	supported by AK102925
4348200	401.298	170.065	1.23788	2.48e-08	supported by AK066178
4337518	137.732	51.3491	1.42569	2.57e-08	ab initio prediction with EST support
4324556	112.285	20.8644	2.42217	2.73e-08	supported by AK109480
4345498	130.525	39.518	1.72404	2.82e-08	supported by AK122145
4348003	169.944	67.0958	1.33917	2.9e-08	ab initio prediction with EST support
4332182	192.489	85.8245	1.16417	2.93e-08	supported by AK100552
4337274	55.8999	1.09112	5.71415	2.94e-08	supported by AY847141
4344426	172.12	61.6866	1.48298	3e-08	supported by AK120363
4341179	444.128	209.69	1.08252	3.03e-08	supported by AK100666
4345870	68.9589	13.8818	2.31937	3.08e-08	supported by CI469805 and CI690716
9271083	49.1563	0.338062	7.01801	3.21e-08	Non-protein coding transcript%2C unclassifiable transcript~supported by AK109584
4342538	433.243	211.097	1.03643	3.25e-08	supported by AK065897
4332579	704.485	332.724	1.08311	3.27e-08	ab initio prediction with EST support
4338446	970.473	482.764	1.00792	3.31e-08	supported by AK061486
novel.774	52.2524	6.13921	3.10982	3.43e-08	-
4326945	318.419	107.68	1.56404	3.52e-08	ab initio prediction with EST support
4329781	2685.27	1233.42	1.12262	3.55e-08	supported by AK120486
4334836	401.856	188.336	1.09157	3.64e-08	supported by AK067137
4346094	290.012	87.0148	1.73679	3.84e-08	supported by AK100965
4349687	819.679	357.78	1.19612	3.89e-08	supported by AK102526
4341358	299.3	93.6891	1.67614	3.9e-08	supported by AK102756
4349364	128.152	45.4264	1.49468	4.14e-08	ab initio prediction with EST support
4347164	189.222	50.2136	1.91275	4.35e-08	supported by AK108738
4344473	98.9469	21.5051	2.20012	4.43e-08	supported by AK109954
4342840	1251.09	575.628	1.12047	4.51e-08	supported by AK110676
4335679	28.1752	0	7.17886	4.53e-08	supported by AK108276
4350067	424.994	197.67	1.10351	4.54e-08	ab initio prediction with EST support
4350545	425.862	182.186	1.22619	4.84e-08	supported by AK108860
4324922	161.322	52.6497	1.61329	5.45e-08	supported by CI319737 and CI568651
4331843	122.766	28.8152	2.0897	5.53e-08	supported by AY323478
4352349	37.8282	1.46145	4.73757	5.65e-08	ab initio prediction with EST support
4326000	221.675	78.6318	1.49385	5.7e-08	supported by AK062394
4329098	730.965	297.711	1.29713	5.87e-08	ab initio prediction with EST support
4338327	30.2005	0	7.27785	5.91e-08	supported by AK064523
4340486	205.462	74.6268	1.45962	6.59e-08	supported by AK072596
4345718	65.1563	11.4781	2.51711	6.94e-08	supported by AK108891
4329717	136.331	40.577	1.74749	7.03e-08	supported by AK105793
4343926	154.744	52.4332	1.56027	7.6e-08	supported by AK072031
9267579	255.41	97.966	1.38325	7.77e-08	ab initio prediction with EST support
4351570	103.486	30.1099	1.78392	7.8e-08	supported by AK064192
4324391	376.88	125.948	1.58264	8.03e-08	supported by AK099862
4346344	186.706	79.5157	1.23172	8.3e-08	supported by AK119880
4346066	287.53	109.666	1.39153	8.44e-08	supported by CI063024 and CI307883
4324220	450.14	222.569	1.01548	8.57e-08	supported by AK071623
4350807	1507.07	66.6337	4.50029	8.6e-08	supported by AK121517
4335042	322.17	138.122	1.21906	8.8e-08	supported by D50602
4344278	8169.63	3739.57	1.12731	9.18e-08	supported by AK073202
9271275	44.3051	4.68268	3.26122	9.27e-08	supported by AK071370
4324885	57.8368	5.31159	3.44958	9.4e-08	supported by AK110253
4348374	32.617	0	7.38618	9.9e-08	supported by AK110474
4335526	57.1858	4.63054	3.6368	9.9e-08	supported by CI433987 and CI658613
4337431	95.9938	20.5015	2.22011	1.07e-07	supported by AK071744
4333634	530.588	20.0257	4.7295	1.18e-07	supported by AK058637
9270111	221.508	105.952	1.06411	1.26e-07	supported by CI558335 and CI774277
4346334	75.3386	14.871	2.34243	1.38e-07	supported by AK063290
4350110	97.1364	23.8739	2.02321	1.38e-07	supported by AK062328
4325444	241.776	118.301	1.03064	1.44e-07	supported by AK121501
4331302	14156.1	1416.23	3.32125	1.46e-07	supported by AK062654
4342050	270.955	112.07	1.27145	1.49e-07	supported by AK105957
4325944	180.238	71.5181	1.33099	1.51e-07	supported by AK059855
4352537	772.044	23.4109	5.04544	1.52e-07	supported by AK072403
novel.604	24.5488	0	6.97946	1.54e-07	-
4337404	133.875	18.333	2.87547	1.57e-07	supported by AK108084
9267383	82.6231	16.7504	2.2962	1.57e-07	ab initio prediction with EST support
4346875	116.999	30.4187	1.9412	1.63e-07	supported by CI413249 and CI641447
4326519	198.008	66.8067	1.56931	1.68e-07	supported by AK068247
4328742	26.5134	0	7.0916	1.68e-07	supported by AK107161
4335455	2085.27	845.57	1.30218	1.69e-07	supported by AK071948
4332121	402.634	30.5826	3.71834	1.73e-07	supported by AK066138
4329640	75.4758	16.5018	2.18887	1.88e-07	supported by AK068488
4329326	35.4137	2.18225	4.05291	1.91e-07	supported by AK064583
4352143	141.189	47.0413	1.5898	1.94e-07	supported by AK069818
novel.1041	38.4496	0.338062	6.66528	1.98e-07	-
9269177	212.646	76.9352	1.46899	2.02e-07	ab initio prediction with EST support
9267740	36.4558	2.74169	3.70478	2.07e-07	ab initio prediction with EST support
9272496	122.021	41.0816	1.56796	2.09e-07	ab initio prediction with EST support
9267615	128.151	47.8125	1.42158	2.1e-07	ab initio prediction with EST support
4333044	222.35	98.3718	1.1745	2.14e-07	supported by AK069928
4339885	221.235	84.0207	1.39342	2.22e-07	supported by AK069429
4330402	195.45	63.3344	1.627	2.23e-07	supported by AK101915
4327401	218.525	50.707	2.11235	2.23e-07	supported by AK106774
4344083	74.1261	12.793	2.53772	2.38e-07	supported by AK109637
4337491	306.93	121.062	1.34157	2.39e-07	supported by AK060983
4337904	2846.55	1158.25	1.29759	2.43e-07	supported by AK071561
4343614	244.098	68.8968	1.82782	2.48e-07	supported by AK107291
4341305	254.352	5.46309	5.55106	2.5e-07	supported by AK103977
4324639	156.986	58.9559	1.41131	2.52e-07	supported by AK073193
4339225	155.446	54.7146	1.50929	2.73e-07	supported by AK103442
novel.1247	22.7749	0	6.87046	2.75e-07	-
4349493	642.412	280.878	1.19381	2.88e-07	supported by AK061555
4341092	380.642	180.478	1.07603	2.95e-07	supported by AK069883
4331397	42.0377	0.720791	5.89229	3.05e-07	supported by AK067473
4341898	206.077	82.819	1.31535	3.18e-07	supported by CI556775 and CI772824
4337762	70.6856	10.4992	2.74883	3.31e-07	ab initio prediction with EST support
9267130	260.127	112.707	1.20425	3.43e-07	ab initio prediction with EST support
4344936	22.1848	0	6.83229	3.44e-07	supported by AK110728
4350063	255.611	19.3878	3.71721	3.5e-07	supported by CI407579 and CI637033
4345775	587.779	269.183	1.12657	3.63e-07	supported by CI561474 and CI777011
4337119	110.469	37.5593	1.5591	3.65e-07	ab initio prediction with EST support
4351401	4495.72	2076.81	1.11432	3.94e-07	supported by AK072576
4334131	234.295	114.933	1.02626	3.94e-07	supported by AK069033
4347390	849.645	405.423	1.06698	3.98e-07	supported by AK107853
4342602	943.422	158.45	2.57426	4.2e-07	supported by AK062594
4328669	304.694	129.006	1.24104	4.4e-07	ab initio prediction with EST support
4324329	69.3217	12.9445	2.43253	4.48e-07	supported by AK106300
4349792	39.7718	4.15847	3.24476	4.56e-07	supported by AK106404
9269181	408.084	116.666	1.80757	4.72e-07	supported by AY878695
4326776	98.3944	34.4998	1.51005	4.79e-07	supported by AK064011
4324748	120.477	42.2915	1.51368	4.92e-07	supported by AK108344
4352476	330.266	163.144	1.01619	4.96e-07	supported by AK070342
4352447	131.096	43.3429	1.59888	5.06e-07	ab initio prediction with EST support
4346051	47.856	6.05972	2.98733	5.06e-07	supported by AK064180
9268649	607.471	288.974	1.07182	5.26e-07	supported by AK066303
4341034	220.147	77.9499	1.49736	5.29e-07	supported by AK102441
4339471	46.9033	6.68863	2.80708	5.69e-07	supported by AK107193
4350821	1373.23	128.464	3.41769	5.84e-07	supported by AK121059
9266243	22.3616	0	6.8426	5.85e-07	ab initio prediction with EST support
4332475	226.372	107.39	1.07364	5.86e-07	supported by AK067339
4338335	357.092	136.242	1.39181	5.91e-07	supported by AK066758
novel.869	33.8389	0.35046	6.48085	5.95e-07	-
4327702	238.698	112.216	1.08828	6.07e-07	supported by AK064212
novel.363	33.8904	2.78635	3.59315	6.07e-07	-
4342318	3538.31	218.856	4.01505	6.2e-07	supported by AF306651
9268756	20.5887	0	6.72491	6.28e-07	Non-protein coding transcript%2C unclassifiable transcript~supported by CI421142 and CI648135
4329044	126.839	48.2724	1.39209	6.33e-07	supported by AK109705
4335602	578.822	187.299	1.62943	6.33e-07	supported by CI428932 and CI654404
9267593	39.9649	5.21733	2.92737	6.39e-07	supported by AK110763
4349374	608.627	244.303	1.3167	6.76e-07	supported by AK066334
4346925	278.522	137.119	1.02222	6.78e-07	supported by AK100032
4347493	185.041	88.6481	1.06059	7.07e-07	supported by CI382300 and CI617297
4352443	356.981	133.545	1.41753	7.31e-07	supported by AK103420
4351850	190.03	84.3796	1.17356	7.55e-07	supported by D10334
4347180	10062	4651.73	1.11314	7.62e-07	supported by AK066748
4332755	94.2605	34.2536	1.46129	8.18e-07	supported by AK105244
4327579	421.742	207.749	1.02119	8.27e-07	supported by AK066200
4328366	255.768	109.466	1.22601	8.39e-07	supported by CI556020 and CI772118
9269206	654.564	315.197	1.05526	8.7e-07	supported by CI369801 and CI608273
9270699	138.553	51.4588	1.4276	8.73e-07	supported by AK063156
9272001	102.433	26.0364	1.9731	8.93e-07	supported by AK062887
4339595	129.578	40.03	1.69693	9.3e-07	supported by CI026016 and CI294865
9269147	306.007	152.774	1.00113	9.38e-07	ab initio prediction with EST support
4342568	149.112	63.3549	1.23368	9.46e-07	supported by AK067956
4346210	50.2251	5.66205	3.15394	9.46e-07	supported by AK107688
4324380	33.7123	3.20883	3.40211	9.75e-07	ab initio prediction with EST support
4337492	171.642	76.5953	1.16381	9.89e-07	supported by AK066225
4335094	33.9536	1.40931	4.59277	9.97e-07	supported by AK119327
4324718	119.103	42.6802	1.478	1.04e-06	supported by AK109735
4324284	3076.2	1504.19	1.03233	1.11e-06	supported by AK065256
4338849	19.2878	0	6.63129	1.15e-06	supported by AK064435
9272536	31.439	2.4111	3.68181	1.15e-06	ab initio prediction with EST support
4324411	59.462	14.8885	2.00216	1.19e-06	supported by AK072107
4331845	794.096	124.184	2.67765	1.19e-06	supported by AK101949
novel.691	51.4278	1.46145	5.16972	1.2e-06	PF01490:Transmembrane amino acid transporter protein
4348540	50.1339	5.74646	3.13664	1.2e-06	supported by AK108245
9269670	656.413	296.157	1.14936	1.21e-06	supported by AK073003
9266867	2990.07	411.825	2.86021	1.24e-06	supported by AK068606
novel.1062	35.0674	4.59334	2.936	1.24e-06	PF05754:Domain of unknown function (DUF834)
4341340	138.309	2.18225	6.00232	1.28e-06	supported by AK071743
4350127	21.0277	0	6.75675	1.34e-06	ab initio prediction with EST support
9266185	222	105.443	1.07332	1.36e-06	Non-protein coding transcript%2C unclassifiable transcript~supported by AK121111
4342338	33.4152	3.52702	3.24228	1.41e-06	supported by AK060877
9266952	32.6945	1.05138	4.95208	1.42e-06	ab initio prediction with EST support
4335203	74.5395	7.13845	3.38855	1.43e-06	supported by AK071801
4347428	533.929	232.968	1.19751	1.51e-06	ab initio prediction with EST support
9270306	1144.57	495.436	1.20875	1.6e-06	Non-protein coding transcript%2C unclassifiable transcript~supported by AK059070
4347129	137.937	47.1387	1.55052	1.67e-06	supported by CI498466 and CI717775
9266041	162.724	69.4962	1.23006	1.79e-06	supported by AK121766
4340915	86.3389	27.9253	1.63101	1.83e-06	supported by AK110659
4326348	251.784	113.499	1.14833	1.89e-06	supported by AK066090
4337609	41.0363	0.700919	5.86487	1.93e-06	supported by AK108981
9269085	393.773	175.84	1.1625	1.97e-06	supported by CI559252 and CI774990
4343839	104.941	41.1563	1.34893	1.99e-06	supported by AK071549
4333791	23.2811	0	6.9056	2.02e-06	supported by AK103716
9271966	46.4368	8.24944	2.50449	2.04e-06	ab initio prediction with EST support
4341643	2278.56	1126.05	1.0171	2.25e-06	supported by AK061635
4351514	28.0518	0.35046	6.20746	2.33e-06	supported by AK064287
4331576	36.3644	4.5412	2.99436	2.39e-06	supported by AK110816
4348886	109.32	43.3136	1.33479	2.44e-06	supported by AK101853
novel.835	36.4157	1.78712	4.36269	2.55e-06	-
4349683	1638.65	775.108	1.08033	2.62e-06	supported by AK065240
4327665	152.928	68.1373	1.1659	2.63e-06	supported by AK070745
4339804	460.846	164.655	1.48566	2.65e-06	supported by AK058553
9271808	38.3106	5.55539	2.77205	2.68e-06	ab initio prediction with EST support
4339406	5274.28	2403.16	1.13417	2.88e-06	supported by AK108715
novel.816	152.783	73.4808	1.05724	2.95e-06	-
4326812	99.5053	37.3284	1.41546	3.04e-06	supported by AY332479
4336764	359.652	158.794	1.17742	3.08e-06	supported by AK061337
4326132	27.6185	2.09783	3.70871	3.09e-06	supported by AK058636
4350057	101.191	41.1463	1.29653	3.32e-06	supported by AK065649
4339799	223.671	108.495	1.04395	3.38e-06	supported by AK064253
novel.167	35.21	3.86015	3.18744	3.5e-06	PF03101:FAR1 DNA-binding domain
4351945	78.3142	19.3423	2.02663	3.58e-06	supported by AF088221
9269673	86.8808	29.4438	1.56487	3.73e-06	supported by AK106438
9271964	61.3558	7.59811	3.02693	3.75e-06	Non-protein coding transcript%2C unclassifiable transcript~supported by AK106942
9269878	32.1617	3.17656	3.33896	3.81e-06	supported by AK064111
4332938	69.2977	12.8849	2.43316	3.82e-06	supported by AK069394
4325771	159.845	78.8699	1.01829	3.85e-06	supported by AK101121
4338211	36.7736	0.708393	5.70656	3.85e-06	supported by AK073843
4337237	77.7359	26.1929	1.57069	3.94e-06	supported by AK107489
4343574	87.6486	23.3817	1.90934	3.99e-06	supported by AK101098
4339565	931.517	433.53	1.10394	4.04e-06	supported by AK059050
4340106	34.8461	3.96189	3.15553	4.11e-06	supported by AK109544
9268427	40.0462	6.63904	2.5835	4.19e-06	supported by CI563293 and CI778698
4325794	371.712	151.143	1.29916	4.24e-06	supported by AB059238
4331047	203.409	89.1003	1.19034	4.26e-06	supported by AK101538
4337100	263.57	130.14	1.01684	4.34e-06	supported by AK067411
4349328	962.335	458.15	1.0713	4.43e-06	supported by AK121815
4338576	41.1489	6.43005	2.68812	4.5e-06	supported by AK070770
4345477	33.7233	0.708393	5.57904	4.52e-06	supported by AK062714
4342114	658.317	41.2355	3.99616	4.56e-06	supported by AK061280
9271498	176.404	87.8728	1.00424	4.58e-06	Non-protein coding transcript%2C unclassifiable transcript~supported by AK110531
4334468	72.9491	23.4238	1.64419	4.68e-06	supported by CI556052 and CI772148
4329518	287.61	116.388	1.30715	4.82e-06	supported by AK066073
4326559	128.166	49.5319	1.37587	4.84e-06	ab initio prediction with EST support
4347963	29.0458	2.78635	3.37003	5.03e-06	supported by AK099448
4346087	97.646	39.8785	1.29255	5.15e-06	supported by AK099291
4342534	351.272	114.357	1.6187	5.17e-06	supported by AK104966
novel.1301	28.4723	0.676123	5.34506	5.32e-06	PF05754:Domain of unknown function (DUF834)
4328384	28.995	2.52031	3.54487	5.38e-06	supported by AK072377
4325726	170.801	76.3152	1.16033	5.42e-06	supported by AK064115
4347859	63.2724	15.5794	2.02364	5.43e-06	supported by AK102702
4337946	181.057	49.539	1.873	5.63e-06	supported by AK069814
9268573	31.2263	2.78635	3.47676	5.96e-06	supported by CI419223 and CI646407
4325657	31.2015	2.46324	3.66171	6.03e-06	ab initio prediction with EST support
4330048	40.5046	5.35133	2.93145	6.19e-06	supported by AK062480
4329279	210.995	97.1277	1.12225	6.22e-06	ab initio prediction with EST support
4348048	25.3463	1.09112	4.57418	6.24e-06	supported by AK071096
4340118	98.3912	26.1576	1.9178	6.31e-06	supported by AK071352
4344662	220.509	89.569	1.30122	6.56e-06	supported by AK109659
4343474	155.287	73.0831	1.08719	6.59e-06	supported by AK110461
4351298	105.995	30.1074	1.81736	6.67e-06	supported by AK120264
9272310	16.7151	0	6.42541	6.71e-06	supported by CI405899 and CI635546
4328132	866.504	425.892	1.02486	6.78e-06	ab initio prediction with EST support
4341607	138.58	57.3244	1.27502	6.96e-06	supported by AK121564
9271663	88.9252	31.4572	1.50134	7.02e-06	supported by CI554580 and CI770789
4330940	604.172	79.256	2.9309	7.2e-06	supported by AK120371
4343999	147.024	56.3012	1.38448	7.34e-06	supported by AK105175
9267307	98.107	35.2003	1.48269	7.65e-06	supported by CI528626 and CI746246
9268297	71.4236	21.0257	1.76198	7.9e-06	supported by AK060039
9267609	98.8591	32.0635	1.62977	7.93e-06	supported by AK065960
novel.724	100.025	33.851	1.5635	8.07e-06	PF00847:AP2 domain
novel.385	138.999	65.0696	1.09567	8.5e-06	PF06813:Nodulin-like
4338583	25.8707	1.04645	4.6161	8.69e-06	supported by AK108862
4330495	184.332	90.482	1.02662	8.8e-06	supported by AK106470
4332497	34.3088	3.28084	3.41422	9.05e-06	ab initio prediction with EST support
novel.1384	119.641	51.0784	1.22719	9.33e-06	PF07887:Calmodulin binding protein-like
4336494	4217.81	1188.36	1.82756	9.6e-06	supported by AK071069
4346746	343.495	171.727	1.00112	9.9e-06	supported by AK059603
4325308	66.4849	13.5412	2.30101	1.01e-05	supported by AK071083
4334038	100.51	40.6937	1.30558	1.03e-05	supported by AK071016
4335877	149.824	71.3432	1.07213	1.04e-05	supported by AB125308
4351369	419.054	170.652	1.29759	1.07e-05	supported by CI441156 and CI664514
4347626	114.418	49.4926	1.20928	1.1e-05	supported by AK105833
4340022	246.186	99.3745	1.30801	1.13e-05	supported by CI036245 and CI299164
4348163	73.005	23.4888	1.63293	1.15e-05	supported by AK064809
4334253	172.142	77.4582	1.15209	1.15e-05	supported by AK100250
9268208	194.019	95.0779	1.02879	1.16e-05	supported by AK109267
4330793	715.473	329.397	1.11965	1.16e-05	supported by AK067456
4343200	212.869	90.6839	1.22942	1.16e-05	supported by AK111455
4349476	202.109	92.8203	1.12507	1.16e-05	supported by CI430161 and CI655183
4351482	127.937	40.6681	1.65736	1.18e-05	supported by AK110641
4330965	35.0216	4.63801	2.92584	1.18e-05	ab initio prediction with EST support
4347672	3712.73	1013.45	1.87332	1.21e-05	supported by AY850134
4352580	2834.24	743.697	1.93013	1.25e-05	supported by AK103445
4330252	26.3067	1.05885	4.63586	1.27e-05	supported by AK106879
4324037	41.9478	5.98533	2.80806	1.29e-05	supported by AK072726
9268095	64.0644	14.1502	2.17952	1.3e-05	ab initio prediction with EST support
4340161	460.768	195.748	1.23632	1.34e-05	supported by AK109934
4343477	109.03	43.4258	1.32523	1.35e-05	supported by CI066077 and CI308622
9270733	29.6583	2.47564	3.58569	1.41e-05	supported by AK101654
4344425	70.9075	20.2398	1.81236	1.41e-05	supported by AK067526
4328708	72.8693	23.9213	1.6053	1.44e-05	supported by AK066275
9268898	65.8645	17.8338	1.89285	1.5e-05	ab initio prediction with EST support
4329754	158.415	68.8422	1.2045	1.51e-05	supported by AK102188
9267885	153.931	54.1526	1.50937	1.52e-05	ab initio prediction with EST support
novel.881	102.327	40.199	1.34873	1.57e-05	PF08224:Domain of unknown function (DUF1719)|PF13966:zinc-binding in reverse transcriptase
4328763	123.738	43.1817	1.51969	1.58e-05	supported by AK101952
novel.1437	174.059	44.4883	1.97203	1.61e-05	-
4333206	40.1566	8.43363	2.24975	1.61e-05	supported by AK108264
4350258	87.3446	31.0076	1.49386	1.69e-05	supported by AK069552
4330461	671.469	325.923	1.04345	1.75e-05	supported by AK070986
4328852	28.147	2.46817	3.51138	1.76e-05	ab initio prediction with EST support
4340411	61.2169	18.0353	1.76596	1.8e-05	supported by AK108885
4341947	182.718	61.1963	1.58085	1.8e-05	supported by CI067539 and CI309014
4339630	253.885	108.941	1.22312	1.81e-05	supported by CI553383 and CI769677
9271042	71.945	15.2618	2.23187	1.85e-05	supported by CI418357 and CI645651
4339765	209.233	94.5764	1.14347	1.89e-05	supported by AK120811
9271552	82.189	24.1867	1.76901	1.99e-05	supported by CI362407 and CI603351
novel.1124	14.787	0	6.24598	2.03e-05	-
4335993	227.779	76.805	1.57159	2.07e-05	supported by AK108406
4330472	162.322	77.2886	1.07046	2.2e-05	supported by AK064357
4343113	27.5611	0.370331	6.18551	2.22e-05	ab initio prediction with EST support
9267813	73.6836	24.9502	1.56136	2.24e-05	supported by AK107507
4331342	41.4467	5.18013	2.98714	2.31e-05	supported by AK070416
4352561	18.0194	0	6.53647	2.31e-05	supported by CI437884 and CI661968
4343484	48.4369	10.1064	2.25236	2.33e-05	supported by CI427025 and CI653247
4349740	161.779	55.9742	1.53397	2.38e-05	supported by AK070778
4327052	76.8456	27.9849	1.45967	2.38e-05	supported by AK101743
4337246	40.0976	2.44829	4.02935	2.38e-05	supported by AK062771
novel.104	49.0886	8.92556	2.4675	2.39e-05	-
4333017	1196.39	562.489	1.08942	2.43e-05	supported by AK068899
4344080	366.545	178.05	1.04282	2.44e-05	supported by AK109004
novel.581	98.3707	22.2357	2.14617	2.46e-05	PF07645:Calcium-binding EGF domain|PF00069:Protein kinase domain|PF13947:Wall-associated receptor kinase galacturonan-binding
4342209	62.6811	16.5068	1.92316	2.49e-05	ab initio prediction with EST support
4342323	25.3659	1.40184	4.1707	2.51e-05	supported by AK068307
4336489	350.114	172.267	1.0229	2.53e-05	supported by AK105289
4340410	40.8973	9.84039	2.05274	2.66e-05	ab initio prediction with EST support
9270076	70.5373	21.8061	1.69251	2.69e-05	Non-protein coding transcript%2C unclassifiable transcript~supported by CI406788 and CI636396
4348145	24.8448	2.08544	3.55945	2.7e-05	ab initio prediction with EST support
4338758	26.2793	2.50791	3.40171	2.73e-05	ab initio prediction with EST support
4325832	17.3153	0	6.47616	2.85e-05	supported by AK069096
9269650	89.2259	29.5261	1.5958	2.89e-05	Non-protein coding transcript%2C uncharacterized transcript~supported by AK120358
4351856	41.6091	9.46513	2.12998	2.9e-05	supported by AJ430051
4339455	53.4297	13.6008	1.98254	2.9e-05	supported by AK106906
4336389	3599.44	1794.62	1.00419	2.97e-05	supported by AK068772
4327329	171.653	81.73	1.0731	2.97e-05	ab initio prediction with EST support
4339070	122.198	53.9844	1.17566	3.12e-05	supported by AK065359
4330489	363.241	178.171	1.02775	3.16e-05	supported by AK103360
4340994	36.9382	7.39957	2.3167	3.32e-05	supported by CI398182 and CI628540
4344897	21.2155	1.04645	4.32974	3.39e-05	supported by CI426397 and CI652666
9268956	160.562	65.8545	1.28967	3.44e-05	supported by CI554302 and CI770534
4327898	116.167	43.3777	1.4239	3.64e-05	supported by CI026803 and CI295210
9266110	129.789	63.1508	1.04024	3.7e-05	supported by AK107436
4333602	403.949	196.711	1.03881	3.98e-05	supported by AK066436
4345292	138.979	9.81797	3.82193	4e-05	supported by CI399261 and CI629593
4324307	194.639	77.8254	1.32326	4.05e-05	supported by AK111354
4352582	56.5042	9.57944	2.56422	4.05e-05	supported by AK105219
4325362	70.4834	24.7464	1.51077	4.08e-05	supported by AK062827
9267506	74.3445	22.4742	1.73272	4.12e-05	supported by AK068654
9272541	134.277	41.4912	1.69655	4.13e-05	supported by CI563016 and CI778447
9266828	24.6711	2.48056	3.32115	4.18e-05	Non-protein coding transcript%2C putative npRNA~supported by CI454221 and CI676215
4343738	346.209	131.169	1.40176	4.21e-05	supported by AK072014
4337500	16561.9	5559.16	1.5749	4.22e-05	supported by AK071638
9272024	45.009	6.06465	2.89836	4.26e-05	Non-protein coding transcript%2C putative npRNA~supported by AK102624
4347592	747.758	153.903	2.28059	4.32e-05	ab initio prediction with EST support
4342315	32.8717	4.21554	2.96151	4.52e-05	ab initio prediction with EST support
4347806	279.858	137.489	1.02583	4.53e-05	supported by CI427276 and CI653482
4344123	50.2978	13.074	1.94493	4.68e-05	supported by AK102825
4330657	3151.96	659.248	2.25745	4.73e-05	supported by AK065229
4341322	26.9593	4.26768	2.66573	4.74e-05	supported by AK070508
4339016	100.004	37.7415	1.40071	4.79e-05	ab initio prediction with EST support
novel.1347	75.6079	29.5957	1.35356	4.85e-05	-
9271249	54.7157	18.3311	1.577	4.89e-05	Non-protein coding transcript%2C uncharacterized transcript~supported by CI484000 and CI704176
9268734	84.8318	27.4389	1.62143	4.9e-05	supported by CI393603 and CI625724
4337468	13.7188	0	6.13941	4.96e-05	supported by AK108418
4345706	89.8509	26.9233	1.74132	5.01e-05	supported by AK072132
4341258	63.2722	9.70401	2.69754	5.2e-05	ab initio prediction with EST support
4342447	154.91	64.6488	1.26501	5.24e-05	supported by AK062586
4330551	170.152	63.6793	1.41963	5.43e-05	supported by AK108932
4338424	57.8341	16.2108	1.8354	5.48e-05	supported by AK063581
novel.128	33.5372	1.11099	4.96313	5.49e-05	PF03106:WRKY DNA -binding domain
novel.1313	53.7992	13.76	1.96699	5.73e-05	-
4339665	53.6133	11.5332	2.21496	5.77e-05	supported by AK108389
4337223	14986.2	4483.83	1.74087	5.83e-05	supported by D90406
4346190	25.974	3.51462	2.88511	5.85e-05	supported by AK111094
4325493	177.925	81.8325	1.11938	6.18e-05	ab initio prediction with EST support
4325241	154.549	75.5857	1.03349	6.19e-05	ab initio prediction with EST support
9269759	82.0289	33.2469	1.30383	6.21e-05	Non-protein coding transcript%2C unclassifiable transcript~supported by AK107778
9272353	72.1457	11.1897	2.69911	6.22e-05	supported by AK106681
9270824	19.2197	0.370331	5.66721	6.39e-05	ab initio prediction with EST support
4333184	50.3693	13.7651	1.87306	6.41e-05	ab initio prediction with EST support
4349245	242.351	119.37	1.02173	6.46e-05	supported by AK061277
4351409	32.8015	4.566	2.84199	6.47e-05	ab initio prediction with EST support
4346011	130.24	45.4925	1.52188	6.63e-05	supported by AK063264
9271584	122.311	57.9266	1.0751	6.76e-05	ab initio prediction with EST support
4336763	142.021	65.1345	1.12447	6.81e-05	supported by AK067005
4343360	11.8588	0	5.92903	7.02e-05	supported by AK108619
4347748	80.8995	15.1988	2.42103	7.36e-05	ab initio prediction with EST support
9270981	30.8532	3.85013	2.99864	7.46e-05	supported by CI397435 and CI627951
4342232	181.771	87.5068	1.05417	7.52e-05	supported by AY341858
4340377	56.0034	19.2758	1.53584	7.52e-05	supported by AK070038
4334815	210.746	60.6123	1.80001	7.6e-05	ab initio prediction with EST support
4335976	1328.88	363.59	1.87017	7.6e-05	supported by AK108048
9268946	16.9102	0.338062	5.47846	7.62e-05	supported by CI038552 and CI300326
4326471	686.908	49.3373	3.79876	7.74e-05	supported by AK062520
4349160	101.789	43.1343	1.24045	7.97e-05	supported by AK063244
4330723	55.4765	13.4567	2.04684	8.03e-05	supported by AK108482
9270958	70.0521	25.6636	1.44666	8.04e-05	ab initio prediction with EST support
4329768	288.981	131.53	1.13717	8.2e-05	supported by AK108080
4326627	75.8853	24.7368	1.61095	8.21e-05	ab initio prediction with EST support
4344505	12.3782	0	5.98826	8.23e-05	supported by AK062376
4340820	102.487	45.0708	1.1835	8.37e-05	supported by AK109790
4326218	365.162	166.7	1.1334	8.38e-05	supported by AK103303
4344489	688.219	53.6742	3.6815	8.55e-05	supported by AK070381
4349372	181.997	87.9859	1.0505	8.59e-05	supported by AK105615
4334568	113.155	48.1379	1.23338	8.79e-05	supported by AK071618
4335481	33.9537	1.77217	4.26468	9.04e-05	supported by CI468961 and CI689848
4328333	127.68	60.8121	1.07025	9.37e-05	supported by AY714497
4348621	19.6157	0.708393	4.7946	9.61e-05	supported by AK119782
4340073	83.3163	28.9499	1.52231	9.75e-05	supported by CI002811 and CI285971
4330111	21.0806	1.09112	4.30615	9.92e-05	supported by AK107491
novel.272	158.244	62.9692	1.32788	0.000105222	PF08263:Leucine rich repeat N-terminal domain|PF13855:Leucine rich repeat
4341681	43.786	11.7442	1.904	0.000108302	ab initio prediction with EST support
4347744	38.544	7.141	2.44223	0.000109864	supported by AK073400
4347107	39.5698	8.87835	2.161	0.000109997	ab initio prediction with EST support
4332559	91.2348	36.9729	1.30436	0.00011233	supported by AK100767
4335065	37.4873	6.6961	2.4872	0.000113819	supported by AK064755
4345656	6042.76	1457.73	2.05156	0.000115289	supported by AB052842
4325662	162.815	57.8152	1.49313	0.000117613	supported by AK105331
9270425	61.7888	22.0071	1.49435	0.000120728	supported by CI455557 and CI677540
4330887	364.469	146.978	1.31226	0.000125955	supported by AK064163
4335334	19.634	1.40931	3.79689	0.000127213	supported by AK111277
4335560	18.1992	0.370331	5.58675	0.00012823	ab initio prediction with EST support
4352563	26.2614	1.81939	3.88056	0.000130124	supported by CI549355 and CI765869
4352858	58.9802	15.237	1.94432	0.000132042	supported by CI551784 and CI768137
4343406	51.8726	18.351	1.50104	0.000133327	supported by AK106593
novel.1069	60.0492	22.2558	1.43524	0.000141011	-
4345155	74.802	30.2272	1.30385	0.000141578	supported by AK102100
4329097	139.671	60.098	1.21796	0.000148247	ab initio prediction with EST support
4325668	23.0066	1.81191	3.69356	0.000150136	supported by AK109624
4340667	197.164	78.8161	1.32528	0.000153697	supported by AK069993
9268151	37.2363	9.9372	1.90961	0.00015697	supported by CI438056 and CI662075
4324168	43.5195	13.7253	1.66267	0.000157191	supported by AK108266
4352200	30.3644	6.32577	2.25994	0.000160261	supported by AK063278
4330027	30.8834	6.98457	2.13765	0.00016047	supported by AK112056
9268380	35.9015	8.79156	2.02821	0.000164762	ab initio prediction with EST support
4346345	157.688	69.9901	1.17603	0.000165459	supported by AK111869
4334366	146.777	69.2631	1.08239	0.000167742	supported by AK072204
4327165	219.593	97.3312	1.17563	0.000168003	supported by U42208
4349269	200.22	81.8943	1.2906	0.000169786	supported by AK106264
4327913	225.257	91.9968	1.29373	0.000172441	supported by AK106618
4349055	75.3078	29.9184	1.33654	0.000172699	supported by AK111107
4335113	104.515	27.47	1.93122	0.000179775	supported by AY569610
4349648	833.033	129.38	2.68743	0.000188441	supported by AK069257
4334698	350.26	173.307	1.01677	0.000194159	supported by AK061773
4337189	163.228	51.1616	1.67788	0.000194257	ab initio prediction with EST support
4350755	38.4841	9.16189	2.06825	0.00019511	supported by AK109785
4344755	690.616	2.44082	8.14231	0.000196043	supported by AK108761
4325658	78.5862	23.705	1.72967	0.000198009	supported by AY341854
4351350	149.589	68.9941	1.11718	0.000198366	supported by AK059980
4331852	294.723	134.981	1.12547	0.000198431	supported by AK100621
4327684	135.745	53.0093	1.3597	0.000206954	supported by AK061091
9272003	149.693	74.5351	1.00514	0.000207015	ab initio prediction with EST support
4331951	18.6404	0.740663	4.70764	0.000208923	supported by AK111079
4331823	40.1803	6.27855	2.67224	0.000210997	ab initio prediction with EST support
4340899	944.599	119.736	2.98015	0.000211093	supported by AK100029
4324690	9.94878	0	5.67633	0.000215625	supported by AK069494
novel.306	33.6353	3.23362	3.39245	0.000216449	PF01397:Terpene synthase, N-terminal domain
4331314	17.065	0.740663	4.58508	0.000223377	supported by CI436361 and CI660701
4350268	54.9217	16.8369	1.71286	0.000224739	supported by CI545550 and CI762287
4335869	276.699	135.424	1.02998	0.000226874	supported by AK105112
4332151	965.971	133.094	2.85993	0.000228641	supported by AK105963
4331657	328.045	40.833	3.00604	0.000230888	ab initio prediction with EST support
novel.278	17.0677	0.688521	4.60489	0.000231801	-
9266121	92.1631	40.7307	1.18133	0.000232926	Non-protein coding transcript%2C uncharacterized transcript~supported by AK101657
4338491	36.7758	8.41868	2.12428	0.000233024	supported by AK106384
9268279	63.4284	19.5141	1.70339	0.000233766	supported by CI416583 and CI644273
4327377	103.775	29.3246	1.82447	0.000250405	supported by AY266289
4352653	143.75	52.0197	1.46979	0.000253733	supported by AY219847
9269903	22.2297	1.07125	4.38842	0.000263603	tRNA-Val
4336865	33.4947	4.34462	2.96447	0.000267545	supported by AK119509
9267634	126.398	61.6205	1.03272	0.000270644	supported by AK119309
4329043	51.3587	15.1447	1.76064	0.000273936	supported by AK106386
9266557	31.3786	3.17401	3.30583	0.00027406	supported by AK107037
4324584	38.33	12.0053	1.67626	0.000289455	ab initio prediction with EST support
4329179	31.9767	7.36238	2.1141	0.000298349	supported by AK061156
4338029	77.4957	33.3461	1.22027	0.000299641	ab initio prediction with EST support
4344680	27.5511	3.60396	2.94779	0.000304103	supported by CI445663 and CI668228
9266868	189.11	85.7308	1.14455	0.000304869	supported by CI543502 and CI760382
9269614	441.387	214.372	1.043	0.000306035	supported by CI417572 and CI645090
4332252	53.0708	20.4116	1.37733	0.000307735	supported by AK062535
4336750	31.7166	2.16237	3.89213	0.00031099	supported by AK064250
4347499	31.793	5.3836	2.57359	0.000313721	supported by AK068607
novel.1121	28.0353	5.3836	2.39362	0.000320649	-
4324051	22.5181	3.50715	2.68097	0.00033211	supported by CI557510 and CI773508
4351863	122.804	55.3684	1.15179	0.000334617	supported by AK107869
novel.982	60.0021	20.4439	1.55598	0.000339185	PF03578:HGWP repeat|PF05754:Domain of unknown function (DUF834)
4350204	20.4488	2.12263	3.26944	0.000343934	supported by AK101707
4331832	24.6823	4.5412	2.43487	0.000347879	supported by AK070649
4332896	129.909	3.14174	5.36691	0.00034992	ab initio prediction with EST support
4351308	17.0474	1.42171	3.59328	0.000353308	supported by AK107809
4351094	41.9095	13.7403	1.60989	0.000359524	supported by AK107783
4335057	109.182	46.5451	1.22688	0.000359946	supported by AK111111
4331583	28.336	5.33893	2.41719	0.000369825	supported by AK100238
4343151	51.8529	18.2839	1.50059	0.000382399	supported by AK069961
4347026	98.2209	23.1576	2.08756	0.00039032	supported by AK107676
4350068	165.166	79.5927	1.05221	0.000393559	supported by AK064121
4331658	469.222	106.408	2.14115	0.000396761	supported by AK106420
4332602	115.544	46.4496	1.31876	0.000398219	supported by AK109929
4331009	54.4815	17.7047	1.62333	0.000400946	supported by AK067973
4349363	1845.85	643.933	1.51942	0.000412287	supported by AK067086
4334976	33.2585	0	7.41707	0.000413252	ab initio prediction with EST support
9270396	62.7484	24.6917	1.34565	0.000425332	supported by CI401483 and CI631732
novel.1537	98.4892	34.62	1.50357	0.000426524	PF00098:Zinc knuckle|PF14223:gag-polypeptide of LTR copia-type|PF13976:GAG-pre-integrase domain
novel.21	12.4809	0.370331	5.04089	0.000430967	-
4324134	97.4282	33.1375	1.55366	0.000438919	supported by AK062404
4330503	78.4216	27.4507	1.51637	0.00044811	supported by AY663848
4352800	123.033	4.71495	4.7125	0.000449905	supported by CI562376 and CI777861
4352571	114.544	53.9173	1.08636	0.000451247	supported by CI439125 and CI662823
novel.317	242.112	33.4647	2.85685	0.000452106	PF07727:Reverse transcriptase (RNA-dependent DNA polymerase)|PF13976:GAG-pre-integrase domain|PF14223:gag-polypeptide of LTR copia-type
4346795	311.784	33.9713	3.19693	0.000455872	supported by AK072740
4343027	37.1704	0	7.57725	0.000460098	supported by AK105371
4337462	36.3561	8.33919	2.11639	0.00046198	supported by AK103610
4328696	58.848	15.4028	1.94058	0.000475141	supported by AK108109
9271038	22.5506	4.21554	2.41899	0.000475587	Non-protein coding transcript%2C unclassifiable transcript~supported by AK109899
9267854	29.2914	4.44439	2.70097	0.000479081	ab initio prediction with EST support
4330536	96.8698	24.7735	1.96882	0.000480652	supported by AK109216
4339385	102.215	26.17	1.97014	0.000481002	supported by AK108457
4337879	61.4372	24.0583	1.34694	0.000484378	supported by AK070904
4349097	488.44	239.295	1.02968	0.000484964	supported by AK067847
4326711	38.0698	10.6704	1.84204	0.000485788	supported by CI077899 and CI311686
4329194	43.1247	13.0988	1.72107	0.000504737	supported by AK069802
4327921	82.6842	39.8885	1.05335	0.000505735	supported by AK061217
4342322	20.3804	3.13681	2.68896	0.000507019	supported by AK069990
4352598	49.1178	16.9664	1.53592	0.000509165	supported by AK106961
9270500	8.75083	0	5.49029	0.000514837	supported by CI407627 and CI637067
4333783	89.1289	42.8584	1.058	0.00051496	supported by AK073577
9268718	29.4788	7.15832	2.05382	0.00051903	ab initio prediction with EST support
4333526	98.748	43.0131	1.19884	0.000523466	supported by AK060224
4324426	80.6622	34.7432	1.21894	0.000532103	supported by AK109770
4340791	109.461	49.9828	1.12829	0.000548282	supported by AK068835
novel.238	36.1794	2.79128	3.69032	0.000556795	PF03936:Terpene synthase family, metal binding domain
4332387	41.4401	5.34641	2.96033	0.000558776	ab initio prediction with EST support
9271094	8.8718	0	5.51369	0.000568658	supported by AK110644
4348971	43.1763	13.7478	1.6537	0.00057941	supported by AK102387
4345414	57.6918	18.4035	1.64076	0.000581265	supported by AY224427
4339611	107.582	29.4413	1.87155	0.000592606	supported by AK064046
4335356	43.5215	14.6551	1.56328	0.00059356	supported by AK108867
4348440	147.998	13.5038	3.45515	0.000595153	supported by AK121279
4343785	183.583	77.967	1.23571	0.000599742	supported by AK101193
4350062	21.4594	2.79875	2.9307	0.00061703	supported by AK111542
4340724	72.0253	33.7666	1.09057	0.000659463	ab initio prediction with EST support
4337110	35.6965	9.19416	1.95833	0.000661465	supported by AK108040
4349673	30.3417	7.45171	2.02718	0.00067839	supported by CI558704 and CI774618
novel.377	63.8843	24.659	1.38095	0.000684411	-
4344937	77.399	31.7611	1.28077	0.00068979	supported by AK105258
4328060	2391.09	767.782	1.63902	0.000689834	supported by AK073508
4338739	27.4843	5.68192	2.27881	0.00070639	supported by AK070554
4352521	137.281	44.2544	1.63749	0.00071373	supported by AK120607
4347534	762.127	183.639	2.05346	0.00071671	ab initio prediction with EST support
4329655	46.5122	12.5468	1.89809	0.000718189	supported by AK108454
4345032	33.2742	5.91332	2.48179	0.000718967	supported by AK061204
9267103	69.4194	30.2516	1.2025	0.000720496	ab initio prediction with EST support
4347215	22.0655	2.82355	2.96741	0.000722406	supported by CI354763 and CI596227
9270605	63.9681	18.3033	1.81238	0.000732253	supported by AK063136
4340983	105.574	26.1588	2.01129	0.00073926	supported by AK071746
4333991	57.8428	13.9717	2.04675	0.000769969	supported by AK063169
4347248	286.725	125.208	1.19718	0.00078784	ab initio prediction with EST support
4327173	67.3722	21.6422	1.63476	0.000796715	supported by AK106457
4332047	152.952	75.1974	1.02764	0.000800104	supported by AK100407
4345037	81.3697	39.4735	1.04473	0.00080156	supported by AK108203
9270348	129.237	12.4675	3.37547	0.000803112	ab initio prediction with EST support
4342262	9.23867	0	5.57075	0.000805421	ab initio prediction with EST support
4329157	29.9118	8.10049	1.88694	0.000806315	supported by AK064642
9267762	83.9901	37.5146	1.1628	0.00082041	supported by CI448817 and CI671119
9271885	103.739	46.5819	1.15572	0.000832254	supported by AK063923
4345922	51.3346	16.1239	1.66838	0.00083393	ab initio prediction with EST support
4347298	64.2681	26.3243	1.2931	0.000842096	ab initio prediction with EST support
4337487	28.8158	8.08809	1.83014	0.000842737	supported by AK070680
4342335	7.84663	0	5.33204	0.00084802	ab initio prediction with EST support
9267858	23.5748	1.85166	3.70907	0.00085552	ab initio prediction with EST support
4324526	47.1512	18.6766	1.33559	0.000857774	ab initio prediction with EST support
4348445	19.7135	0.700919	4.80764	0.000867361	supported by AK058583
9266122	57.8928	24.7015	1.22842	0.000871616	ab initio prediction with EST support
4333455	86.6462	38.2509	1.17739	0.000880247	supported by AK119606
4326068	113.249	52.3039	1.11706	0.000889598	ab initio prediction with EST support
9267196	7.89813	0	5.3403	0.000904359	supported by AK060695
novel.1434	7.79379	0	5.32352	0.0009091	PF02545:Maf-like protein
4325257	35.6901	5.51523	2.71368	0.000924268	supported by AK103614
4329917	95.0183	46.381	1.03503	0.000936482	ab initio prediction with EST support
4340632	1890.6	469.986	2.00822	0.000949316	supported by AK062130
4326919	73.7594	28.0672	1.3925	0.000952638	supported by AK071585
novel.354	8.26468	0	5.41127	0.000960316	-
novel.1200	36.8532	12.6814	1.53829	0.000964819	-
4344843	16.2353	1.42171	3.5208	0.000996108	supported by AK061029
4333082	102.516	44.3047	1.21407	0.00101398	supported by AK068330
4337038	18.5736	2.51283	2.90206	0.00102305	supported by AK063017
4351455	125.943	55.0595	1.19741	0.00102679	supported by CI036504 and CI299279
9269489	150.763	20.555	2.87763	0.00104751	supported by CI421901 and CI648798
4349702	406.042	92.4604	2.13506	0.00106455	supported by AK064966
4324565	77.2115	34.6613	1.15569	0.00106494	supported by AK062551
9269871	41.5969	6.84013	2.61623	0.00107861	supported by CI396574 and CI627181
4341587	44.2242	11.3967	1.94598	0.00108493	supported by AK107791
9267389	26.9098	7.08138	1.92846	0.00109877	supported by AK107905
novel.529	56.5384	22.7452	1.31742	0.00110218	-
4324839	7.79312	0	5.32338	0.00111936	supported by AK072787
9267709	40.9738	13.2056	1.63987	0.00113396	Non-protein coding transcript%2C unclassifiable transcript~supported by AK109226
4349123	123.148	41.8042	1.55877	0.00114192	supported by AK100465
4327022	28.0705	8.14023	1.78884	0.00114722	supported by AK069522
4329660	26.6991	6.78051	1.98687	0.00115028	ab initio prediction with EST support
4339483	102.636	28.4347	1.85422	0.00117477	supported by AK106049
4335925	70.7337	27.4577	1.36928	0.00118348	supported by AK109788
4346199	65.566	30.1154	1.11864	0.00118902	supported by AK100665
4351685	63.7985	30.2967	1.0747	0.00120205	ab initio prediction with EST support
4336495	45.9045	16.0168	1.5239	0.00122011	supported by AK109281
4328531	175.005	83.5034	1.06685	0.00122972	supported by AK100832
9269766	71.3038	24.0574	1.57352	0.00124629	ab initio prediction with EST support
9268939	11.5827	0.35046	4.93282	0.00125489	ab initio prediction with EST support
4347755	71.1932	30.337	1.22576	0.00128059	supported by AK064274
4331959	290.574	126.382	1.20237	0.00131638	supported by AK069890
4343085	66.1927	32.1682	1.0423	0.00134112	supported by CI435296 and CI659723
4349235	354.611	95.1711	1.89812	0.00135329	supported by CI543090 and CI759984
novel.886	48.5646	13.3375	1.86359	0.00137339	PF13639:Ring finger domain
novel.1120	14.8097	1.77964	3.06842	0.00139283	-
4326355	81.9658	0	8.71811	0.00144398	supported by AK110682
4336344	184.014	89.6664	1.03906	0.00144762	supported by AK102222
9269211	26.2837	5.23957	2.32016	0.00144772	ab initio prediction with EST support
4327507	81.8697	31.5586	1.38073	0.00147961	supported by AK105246
4344204	335.291	17.106	4.29224	0.00152922	supported by CI482782 and CI703092
4352683	33.9403	10.6655	1.67779	0.00154712	supported by AK120039
4339529	51.2941	16.2134	1.66125	0.00157286	supported by CI036671 and CI299375
4333386	62.3956	26.6823	1.22989	0.00157855	supported by AK108026
4351701	12.3081	0.720791	4.12138	0.00158225	supported by CI562241 and CI777743
4343729	21.8073	2.57245	3.11047	0.00158606	supported by AK119464
4328470	210.038	104.765	1.00102	0.00159356	supported by AK067063
4336063	40.3749	14.7197	1.45136	0.00163134	supported by AK106790
4342007	33.3362	10.1785	1.70929	0.001655	ab initio prediction with EST support
4347249	28.541	7.14337	2.00526	0.00166124	supported by AK102152
4330164	51.3908	18.4999	1.48083	0.00167941	supported by AK103028
4336042	83.1218	28.9529	1.51473	0.00168039	supported by AK103526
4346787	13.3126	0.700919	4.24209	0.00169456	supported by AK071689
4326788	121.965	52.0071	1.23381	0.00169819	supported by Z34270
9268879	13.6104	1.05138	3.68982	0.00170062	supported by AK119510
4333284	32.654	0	7.39028	0.00171855	supported by AK119569
4328124	830.512	16.1685	5.68259	0.00173405	supported by AK110925
4352145	14.9499	1.75977	3.08558	0.00175264	ab initio prediction with EST support
4340631	17.2418	2.09291	3.03336	0.00175936	supported by AK103538
4346786	18.7152	3.88495	2.2699	0.00176152	supported by AK073913
9268550	74.5703	32.9138	1.17902	0.0017622	Non-protein coding transcript%2C unclassifiable transcript~supported by CI480659 and CI701135
9268475	7.78019	0	5.32144	0.00181252	Non-protein coding transcript%2C unclassifiable transcript~supported by AK063130
4339183	36.3185	12.4601	1.54843	0.00181792	supported by AK110420
4343392	60.6138	23.0118	1.39338	0.00182723	supported by AK105659
4331769	23.1411	6.02253	1.94508	0.00184776	ab initio prediction with EST support
4345363	32.0647	9.26108	1.79615	0.00186311	supported by AK100580
novel.157	10.6622	0.338062	4.81306	0.00190276	-
9271064	29.6313	9.08733	1.69956	0.00190386	supported by CI385393 and CI619422
4345525	27.1527	7.82204	1.80122	0.00190667	supported by AK103556
4326725	26.9487	4.71495	2.53202	0.0019118	supported by AK106554
9266299	54.7337	24.7761	1.1466	0.0019164	supported by CI561853 and CI777361
novel.1119	20.5216	4.56107	2.16713	0.00191654	-
4334989	54.7759	22.6161	1.2792	0.00195685	supported by AK102639
4341457	22.2332	3.54197	2.65076	0.00198948	supported by AK106474
9268568	25.2054	6.9771	1.84639	0.00199204	ab initio prediction with EST support
novel.601	22.2894	5.3588	2.06783	0.00199673	-
4326846	38.3732	11.5655	1.72747	0.00201394	supported by AY333187
4336400	131.751	55.5039	1.24563	0.00203361	supported by AK062955
4336049	1262.68	261.08	2.27424	0.00203816	supported by AK106202
4328249	1908.03	698.48	1.44991	0.00204703	supported by AK065704
4334260	67.0956	32.899	1.02992	0.00210655	supported by AK112018
4332568	451.485	66.6685	2.7592	0.002118	supported by AK121376
4326064	12.3975	0.676123	4.1529	0.00212697	ab initio prediction with EST support
novel.300	43.9697	17.5705	1.31967	0.00214599	-
4350679	68.793	33.7692	1.02603	0.00215811	supported by AK066017
9267565	49.8229	19.8898	1.31848	0.00216988	ab initio prediction with EST support
novel.1267	55.7518	19.7276	1.50431	0.00217196	PF04927:Seed maturation protein
novel.1236	9.28816	0.338062	4.61634	0.00218725	-
4348053	9.72348	0.370331	4.67988	0.00222258	ab initio prediction with EST support
4350521	81.4421	31.2194	1.37778	0.00223257	supported by CI553248 and CI769530
4336247	22.5536	4.84699	2.20523	0.00225982	supported by AK069045
4341337	586.27	170.343	1.78295	0.00227137	supported by AB004799
4339095	307.669	141.078	1.12658	0.00228151	supported by AK060423
novel.910	50.3293	1.11099	5.52585	0.00228843	-
4339106	24.5996	5.18013	2.23522	0.00229732	supported by AK100179
4352917	106.255	37.6803	1.49943	0.00235088	supported by CI065437 and CI308457
4326066	27.4631	6.47472	2.0982	0.00235875	supported by CI390256 and CI623416
4330329	73.0378	26.3912	1.47166	0.00236892	supported by AK107937
4346301	48.1269	17.6674	1.44528	0.00237051	supported by AK069659
4340771	6.50978	0	5.06492	0.00243828	ab initio prediction with EST support
9269310	13.3875	0.708393	4.24895	0.00248875	supported by CI434600 and CI659103
9271939	28.9046	8.32934	1.78387	0.00253727	ab initio prediction with EST support
9266295	122.188	57.8606	1.08305	0.00256643	supported by AK058336
4348829	1488.99	599.594	1.3125	0.00258683	supported by AK102352
4336385	89.6579	43.2337	1.05401	0.00259951	supported by AK107826
9267404	11.6159	0.708393	4.03968	0.00260297	Non-protein coding transcript%2C unclassifiable transcript~supported by CI417114 and CI644671
4348724	843.375	287.617	1.55247	0.00262197	supported by AY224486
4325388	36.8246	6.48712	2.51266	0.00264026	supported by AK107370
novel.478	48.4661	19.4519	1.31661	0.00268773	-
4339356	6.49351	0	5.06181	0.002707	supported by AK063238
4330530	1953.06	640.885	1.60776	0.00270805	supported by AK067050
4348479	38.8547	13.6832	1.50583	0.00273716	supported by AK069144
4347232	29.5543	5.71419	2.37637	0.00274853	ab initio prediction with EST support
4324191	12.4314	1.40931	3.14135	0.00276025	supported by AK103045
4336982	20.2292	3.2535	2.65364	0.00276545	supported by AK100259
9270843	58.1879	22.6033	1.37084	0.00281275	supported by CI402635 and CI632729
4337414	70.138	24.5626	1.51297	0.00281756	supported by AY461803
4325997	11.5156	0.338062	4.9253	0.00283064	ab initio prediction with EST support
4339737	24.3407	4.37196	2.49452	0.00284951	supported by AK109766
4344321	53.0648	22.4073	1.24798	0.00294124	supported by AK105051
4337615	342.708	49.7198	2.78613	0.00298687	supported by AK106226
9272303	17.5512	3.47488	2.32424	0.00303622	supported by AK058609
4348471	37.8329	12.9449	1.54453	0.0031146	supported by AK065000
novel.1517	6.19776	0	4.99415	0.00315585	PF07893:Protein of unknown function (DUF1668)
4324133	221.305	108.132	1.03244	0.0031618	supported by AK062811
4344207	50.3352	8.83113	2.51173	0.00318834	supported by AK109386
novel.598	39.4682	12.4774	1.66739	0.00321539	-
4342964	13.4881	0.688521	4.27385	0.00321721	supported by AK073416
9272230	70.395	34.681	1.02133	0.00322918	ab initio prediction with EST support
4350518	45.8563	17.2152	1.41194	0.00324261	supported by AK062443
4345540	67.265	30.1721	1.15708	0.00326614	supported by AK059926
4351001	50.2586	23.3196	1.10892	0.00331466	ab initio prediction with EST support
4326229	9.60354	0.35046	4.66417	0.00336714	supported by AK070626
9269368	62.3706	30.8185	1.01964	0.0033789	Non-protein coding transcript%2C unclassifiable transcript~supported by AK058394
4327707	1015.05	324.433	1.64586	0.00339292	supported by AK067101
4347345	7.22458	0	5.21325	0.00339309	ab initio prediction with EST support
4330641	39.1976	12.5667	1.65022	0.00342545	supported by AK111335
4345031	15.5022	2.49551	2.64557	0.00353029	ab initio prediction with EST support
novel.1527	28.4696	8.11034	1.81324	0.00354097	-
4346892	41.7137	17.1308	1.27779	0.00366993	supported by CI544315 and CI761188
4336655	23.7157	5.6099	2.07624	0.00371794	ab initio prediction with EST support
4326674	34.5271	11.8192	1.53752	0.00377342	supported by AK065494
4338413	1403.59	582.947	1.26762	0.00379181	supported by AK066255
4327183	166.086	69.8824	1.25204	0.00380268	supported by CI466562 and CI687569
4343562	42.828	18.7412	1.19569	0.00382384	supported by AK071294
4339688	538.873	67.9737	2.98747	0.00383974	ab initio prediction with EST support
4332422	56.6589	13.1836	2.09719	0.00384038	supported by AK061425
4330871	24.0566	4.71495	2.36506	0.00387761	supported by CI454415 and CI676398
4329845	13.9563	2.11023	2.7246	0.00390376	supported by AK069976
4329464	22.0383	3.16161	2.79967	0.00391107	supported by AK103266
4352508	18.2025	1.02658	4.12687	0.00405135	ab initio prediction with EST support
9268456	8.68239	0.370331	4.51866	0.00410403	supported by CI401282 and CI631547
novel.31	19.8441	3.95442	2.34111	0.00411319	-
4352116	109.16	53.0349	1.04201	0.00425376	supported by AK063710
4330663	59.3448	24.3908	1.28638	0.00429091	supported by CI551315 and CI767686
4339694	48.5599	20.2447	1.26761	0.00452941	supported by CI481960 and CI702337
9268855	105.454	38.568	1.45263	0.00460054	supported by CI393260 and CI625510
9268773	55.2455	25.7232	1.10249	0.00463276	supported by AK063799
9267619	37.4816	7.71734	2.29627	0.00463384	supported by CI394096 and CI626007
4336265	23.5931	4.29248	2.47041	0.00463439	supported by AK071013
4325681	15.6428	2.41602	2.68193	0.00472162	supported by AK110482
9266639	8.52454	0.338062	4.49536	0.004758	ab initio prediction with EST support
novel.1327	52.5206	16.5609	1.67322	0.00479631	PF00240:Ubiquitin family
4346743	24.7761	7.46411	1.738	0.00481633	ab initio prediction with EST support
4330678	110.951	52.6587	1.07811	0.00488875	supported by CI423061 and CI649800
4330155	134.332	63.2442	1.08935	0.00491759	supported by AK063685
novel.117	62.6737	30.5896	1.03913	0.00499203	PF05754:Domain of unknown function (DUF834)
9272215	27.5677	9.47006	1.53712	0.00499218	supported by AK101638
9268405	29.1532	8.87835	1.72059	0.00499659	supported by CI438960 and CI662613
novel.273	8.29991	0.370331	4.45524	0.00505797	-
4339394	6.63075	0	5.09511	0.00505849	supported by AK111246
9268113	13.0568	1.79204	2.87973	0.00507235	ab initio prediction with EST support
4351408	19.2356	4.99595	1.95518	0.00509083	supported by AK111431
4349969	58.0909	28.4475	1.02788	0.0051073	supported by AK121325
4328230	59.274	24.6887	1.2693	0.00515483	supported by CI549716 and CI766185
4352826	31.2984	11.9134	1.38875	0.00517861	supported by AK101363
4324966	19.6401	3.52702	2.48027	0.00521538	supported by AK107053
4342796	23.2262	7.01684	1.72567	0.00523979	supported by CI427459 and CI653631
9269036	7.72535	0.35046	4.35096	0.00526012	supported by CI445616 and CI668184
4326735	606.782	150.671	2.0103	0.00527071	ab initio prediction with EST support
novel.706	32.6739	12.0102	1.44805	0.00530657	PF05754:Domain of unknown function (DUF834)
4343942	41.7161	18.7858	1.15473	0.00538312	supported by AK071704
4344839	8.01945	0	5.36939	0.00545821	supported by AF032972
9267218	28.8172	10.6332	1.44059	0.00556155	ab initio prediction with EST support
4326273	22.534	7.02177	1.67851	0.00566395	supported by AK101508
4339574	319.883	100.806	1.66584	0.00567183	ab initio prediction with EST support
4327002	39.314	10.037	1.96449	0.00573442	supported by AK067102
4351866	17.5442	1.09112	4.02911	0.00577891	ab initio prediction with EST support
9270624	217.262	106.298	1.03242	0.00581375	supported by AK111349
4324580	28.0247	6.60932	2.07655	0.00583052	supported by AK063270
4345470	40.8622	7.43931	2.46211	0.0058343	supported by AK111829
novel.1095	74.8779	32.5458	1.20072	0.00590718	-
4329520	4183.6	1221.36	1.77632	0.00592597	supported by AY166599
4330508	46.9073	19.9216	1.23778	0.00600008	supported by CI429897 and CI654980
4347784	11.6698	0.740663	4.02674	0.00606178	supported by CI436817 and CI661106
4337351	1011.95	364.187	1.47433	0.00613931	supported by AK109371
4352167	74.3861	32.3126	1.20333	0.00622225	supported by AK122032
4351915	429.68	22.8666	4.23247	0.00634482	ab initio prediction with EST support
4338400	41.8374	19.4421	1.10694	0.00638003	supported by CI447354 and CI669792
4330772	521.733	159.652	1.70893	0.00641139	supported by AK106338
novel.891	151.908	31.5092	2.27009	0.0065101	PF00665:Integrase core domain|PF13976:GAG-pre-integrase domain|PF07727:Reverse transcriptase (RNA-dependent DNA polymerase)|PF00098:Zinc knuckle|PF14223:gag-polypeptide of LTR copia-type
4352389	145.04	57.4612	1.33725	0.0065591	ab initio prediction with EST support
4330542	31.4365	4.51386	2.79483	0.00657818	supported by AK070415
4346744	36.3338	14.0907	1.36324	0.00660088	supported by AK071461
4325455	39.1481	15.3858	1.34409	0.0066623	supported by AK119467
4340416	26.0388	8.89822	1.5535	0.0067074	supported by AK106373
4347320	60.3659	24.1119	1.33066	0.00673897	supported by AK064135
9272044	10.0332	0.720791	3.82592	0.00673933	supported by CI396956 and CI627402
novel.1285	11.3507	1.01418	3.44491	0.00684718	-
4343826	389.955	24.7487	3.97804	0.00691995	supported by AK105572
9269077	39.4757	15.0278	1.3898	0.00696012	ab initio prediction with EST support
4352384	44.215	18.0999	1.28919	0.00696376	supported by AK109836
4349169	44.7873	16.4566	1.45189	0.00698336	ab initio prediction with EST support
novel.880	40.6733	18.7138	1.11997	0.00707985	-
4325628	265.765	76.7544	1.79182	0.00711653	supported by AK100351
4346748	7.15212	0.35046	4.23838	0.00714295	ab initio prediction with EST support
4328502	21.9469	5.29171	2.05416	0.00716381	supported by AK110418
4330421	15.7112	3.14921	2.3159	0.00725545	supported by AK109931
4331835	5.52153	0	4.82916	0.00733073	supported by AK064006
4350823	212.233	55.7668	1.92775	0.00747337	supported by AK121127
4341202	53.7856	25.1716	1.09105	0.00750193	ab initio prediction with EST support
9271464	51.5466	24.1645	1.0965	0.00756301	ab initio prediction with EST support
novel.356	21.8927	5.02822	2.13021	0.00769894	PF05754:Domain of unknown function (DUF834)
4347077	32.0305	11.1525	1.53306	0.00771781	supported by AK109320
4327067	281.378	78.3657	1.8451	0.00773321	supported by CI349751 and CI592496
4333604	2964.27	1148.9	1.3675	0.00782591	supported by CI386721 and CI620521
4352120	16.5107	3.80054	2.10516	0.00784499	supported by AK108851
4333929	46.2666	21.3512	1.11146	0.00788443	supported by AK065707
4336841	12.3586	1.81191	2.78907	0.00795586	supported by AK111960
4340877	80.675	25.0478	1.68381	0.00797945	supported by AK062964
4343498	16.5579	3.48235	2.2367	0.00804179	supported by AK100722
4330578	24.2554	7.41197	1.71467	0.00835863	ab initio prediction with EST support
4326003	5.20817	0	4.74519	0.00841056	supported by AK108197
4346438	75.3561	7.98636	3.23547	0.00844691	supported by AK100234
4349207	24.4986	8.07569	1.60026	0.0084551	supported by AK059760
4349690	73.5946	31.2634	1.23192	0.00863651	ab initio prediction with EST support
9272252	44.7766	14.7017	1.61306	0.0087542	supported by AK072627
4341117	33.804	12.1498	1.4681	0.00875791	supported by AK106229
9271570	56.0464	17.053	1.72594	0.00876778	supported by AK103071
4342640	20.5382	5.23465	1.96347	0.0089873	supported by AK062637
4333415	77.3168	36.9981	1.0582	0.00905117	ab initio prediction with EST support
novel.415	10.2439	1.42918	2.8551	0.00905952	-
4329399	5.64013	0	4.85608	0.00913721	ab initio prediction with EST support
4326809	43.5696	20.7819	1.06613	0.00917968	supported by AK068939
4342507	19.2641	2.94278	2.73101	0.0093394	ab initio prediction with EST support
4337918	32.8064	13.0915	1.32699	0.00944239	supported by CI427443 and CI653618
4324954	29.6157	12.316	1.26488	0.00966306	supported by AK106574
4337000	36.5466	13.8942	1.4033	0.00972487	supported by AK064641
4340692	5.00047	0	4.68293	0.00972707	supported by AK073534
4341626	48.2351	21.9028	1.13893	0.00978994	ab initio prediction with EST support
4327744	10.0897	0.708393	3.83554	0.00983216	supported by AK107508
4349058	6.89262	0	5.1503	0.00984667	supported by AK063117
4326185	19.7224	5.95799	1.72227	0.00985356	supported by AK110719
4351737	5.3484	0	4.779	0.00987278	ab initio prediction with EST support
9272517	87.6779	29.5227	1.5753	0.00988065	supported by AK108227
novel.43	8.71494	0.700919	3.63037	0.00989203	-
4340799	40.3214	17.5383	1.19793	0.00992395	supported by AK119403
4344761	5.71161	0	4.88032	0.00992745	ab initio prediction with EST support
4325349	45.7931	22.6385	1.01656	0.00998638	supported by AK103199
9271938	9.34033	1.07872	3.13368	0.0100347	supported by CI392911 and CI625404
4331449	10.5369	1.42171	2.89809	0.0100604	supported by AK060316
4337222	118.94	56.8714	1.06797	0.010125	supported by AK061488
9269862	24.7395	8.10304	1.61212	0.0101522	supported by AK105247
4330727	1403.44	661.107	1.0862	0.0101796	supported by AK066613
9270503	29.0944	5.84582	2.3319	0.010245	supported by CI390049 and CI623139
4344137	21.0566	6.37044	1.72533	0.0103088	supported by AK122088
9266611	20.4305	4.78993	2.07444	0.0104568	ab initio prediction with EST support
4340084	7.02982	0.35046	4.20829	0.0104736	supported by CI462414 and CI684066
4337549	4.91308	0	4.66067	0.0105205	ab initio prediction with EST support
9266523	407.761	87.9892	2.21296	0.0105678	supported by CI402507 and CI632625
novel.984	16.2011	2.51283	2.7026	0.010644	-
4333527	40.8661	16.9769	1.25935	0.0107682	supported by AY224555
9269560	5.12042	0	4.71311	0.0109731	supported by AK111004
novel.19	53.4486	26.7369	1.00403	0.0109805	PF12274:Protein of unknown function (DUF3615)
4350282	12.4992	1.69031	2.85466	0.0110165	supported by AK103644
9267138	25.4818	8.4484	1.58987	0.0110293	ab initio prediction with EST support
novel.1333	47.0236	14.5227	1.70344	0.0111459	-
4345301	25.9734	8.57256	1.60814	0.0112206	supported by AK103806
4352106	5.06758	0	4.69977	0.0112609	ab initio prediction with EST support
novel.1561	18.3185	4.91646	1.89626	0.0113287	PF14363:Domain associated at C-terminal with AAA|PF00004:ATPase family associated with various cellular activities (AAA)
4326968	8.47604	0.338062	4.48215	0.0113593	supported by CI486847 and CI707084
9267847	43.0825	18.823	1.19929	0.0113619	Non-protein coding transcript%2C unclassifiable transcript~supported by AK109562
4335460	56.8673	13.3202	2.09297	0.0118081	supported by AK110725
4341606	15.2978	3.52702	2.11712	0.0118478	supported by AK066059
novel.1191	45.9848	20.583	1.1607	0.0119243	PF05754:Domain of unknown function (DUF834)
4340021	10.2263	1.38944	2.86828	0.0120218	ab initio prediction with EST support
9269048	33.0872	14.7147	1.16519	0.0120219	supported by AK108402
4328814	74.9195	23.9683	1.6437	0.0120641	supported by AK068806
9269603	34.7212	15.1396	1.19602	0.012099	supported by AY702084
novel.223	8.38463	0.740663	3.55114	0.0122408	-
4340867	21.5335	5.66459	1.92899	0.012264	ab initio prediction with EST support
4329861	9.2895	1.07125	3.12953	0.0125391	supported by CI549948 and CI766385
9269791	36.8492	15.8828	1.21444	0.0125492	supported by AK072230
