# Supplementary material for: Overexpression of OsMed16 Inhibits the Growth of Rice and Causes Spontaneous Cell Death
Source: Genes (Basel). 2021 Apr 27;12(5):656. doi: 10.3390/genes12050656 (PMC8145620; doi:10.3390/genes12050656)
Supplement: Supplementary file 1 [file genes-12-00656-s001.zip › Table S3.xlsx]

## Sheet: Avsa_deg_down
Table S3. Compared with the wildtype, 983 genes were downregulated in OsMed16-OE plant leaves
Gene_id	OE	WT	Log2FoldChange	P-value	Gene_description
4341383	279.723	1969.28	-2.81562	6.31603e-94	supported by AK067453
novel.1208	133.429	1779.22	-3.73406	1.77959e-78	PF07714:Protein tyrosine kinase|PF01333:Apocytochrome F, C-terminal|PF00069:Protein kinase domain
4352650	87.19	1217.94	-3.80142	1.39713e-56	ab initio prediction with EST support
9269730	103.507	791.389	-2.93601	2.52471e-51	ab initio prediction with EST support
4350534	897.1	4612.45	-2.36171	1.6532e-44	ab initio prediction with EST support
9267168	75.1513	562.942	-2.90554	7.86194e-43	supported by AK071265
4336855	941.029	3648.31	-1.95446	1.62374e-42	supported by AK121673
4340075	632.742	4389.95	-2.79375	2.3497e-42	supported by AK061234
9271211	302.162	1403.32	-2.21619	1.8161e-41	Non-protein coding transcript%2C hold transcript~supported by CI442960 and CI666007
4343987	173.175	924.368	-2.41442	4.15122e-41	supported by AK111564
4350109	5.62453	224.358	-5.32087	1.01911e-36	ab initio prediction with EST support
4324568	5425.06	15729.7	-1.53569	1.44021e-35	ab initio prediction with EST support
4343697	154.397	733.114	-2.24574	1.83416e-35	ab initio prediction with EST support
4350024	0	3769.27	-14.4175	4.63914e-34	supported by AK071032
4326840	510.45	1766.84	-1.79077	4.4615e-33	supported by AK067493
4338773	63.7105	463.735	-2.85778	2.04421e-32	ab initio prediction with EST support
4350959	82.649	432.576	-2.38626	2.70473e-32	supported by AK072169
4348206	142.048	1274.2	-3.16466	3.95712e-32	supported by AK099018
4352848	1181.51	3060.27	-1.37296	5.85408e-32	supported by AK121150
4352131	614.809	2341.2	-1.92827	6.77152e-32	supported by AK068449
9268627	862.007	2714.18	-1.65423	8.571e-32	supported by AK066891
4329982	313.224	1395.61	-2.15492	1.60653e-31	supported by AK100073
4343986	740.796	3723.8	-2.32928	1.62456e-28	supported by AK111594
novel.953	244.267	1218.93	-2.3173	2.71559e-28	-
4326803	54.5792	287.54	-2.39357	4.07006e-28	supported by AK066107
4328798	4040.94	8743.78	-1.11355	5.57725e-28	supported by AK120560
4324425	1216.76	2688.3	-1.14359	7.42464e-28	supported by AK100064
4345356	73.0317	745.132	-3.34795	2.51453e-27	supported by AK060790
9270250	47.756	259.355	-2.43803	7.39798e-27	supported by AY838901
4339096	49.52	470.565	-3.24302	9.0244e-27	supported by AK066119
4348282	1703.59	3952.46	-1.21407	1.27602e-25	supported by AK070579
4330451	9092.94	27361.4	-1.58925	1.38749e-25	supported by AY838897
9269493	513.67	1719.63	-1.74254	2.90067e-25	supported by AK109458
4328909	192.915	731.446	-1.92067	3.31975e-25	supported by AK063627
4336630	197.109	1028.23	-2.38233	8.16247e-25	supported by CI333267 and CI580915
4348292	0	812.67	-12.2038	8.58192e-25	supported by AK069438
4347137	322.848	1600.22	-2.30825	9.23789e-25	supported by AK104973
4324704	1060.72	2257.05	-1.08927	1.23148e-24	supported by AK061237
4343010	8652.73	19884	-1.20037	2.06038e-24	supported by AK102058
4345810	219.039	664.064	-1.60124	2.33286e-24	supported by AK120757
4333492	545.082	1303.02	-1.25681	2.6516e-24	ab initio prediction with EST support
4330773	151.907	682.847	-2.16687	2.83614e-24	supported by AK066301
9267938	1178.09	2830.56	-1.26488	3.67288e-24	ab initio prediction with EST support
9272159	0	738.598	-12.0661	3.72483e-24	supported by CI075379 and CI311066
novel.1260	103.726	411.437	-1.98515	4.04677e-24	-
4327761	1073.02	2611.03	-1.28299	5.11483e-24	supported by AK110758
4339715	289.621	831.633	-1.5208	8.56302e-24	ab initio prediction with EST support
4349192	190.213	906.735	-2.25185	8.69242e-24	supported by AK103309
4332125	1533.22	4598.64	-1.58431	1.35364e-23	supported by AK065961
4324303	19647.7	64767.6	-1.7209	1.86959e-23	supported by AK111768
4329356	1143.06	2484.36	-1.11982	1.99284e-23	supported by AK121008
4335782	470.94	1490.55	-1.66185	5.65057e-23	supported by AK059525
4348283	851.186	2664.57	-1.64585	8.41969e-23	supported by AK067578
4335374	336.049	1348.98	-2.00528	1.14127e-22	supported by AK120187
4333985	2613.03	6978.35	-1.41702	3.63627e-22	supported by AK108046
4324493	192.872	599.893	-1.63678	6.47517e-22	supported by AK099949
novel.580	108.533	613.553	-2.49644	9.18569e-22	PF13947:Wall-associated receptor kinase galacturonan-binding|PF07714:Protein tyrosine kinase|PF13966:zinc-binding in reverse transcriptase
4328182	206.136	731.725	-1.82579	1.01216e-21	supported by AK065700
4343841	117.726	417.111	-1.82439	1.64874e-21	supported by AK101099
4329938	263.974	787.136	-1.575	1.65983e-21	supported by AK058418
4339731	296.161	1049.8	-1.82469	2.23019e-21	ab initio prediction with EST support
4345134	230.506	864.489	-1.90586	3.36417e-21	supported by AK063209
9272139	369.1	1926.97	-2.38342	3.64474e-21	supported by CI322521 and CI570596
4350668	1689.94	3704.66	-1.13224	4.17677e-21	supported by AK065177
9267648	389.521	1083.32	-1.47447	4.29098e-21	ab initio prediction with EST support
4326103	56.9774	314.446	-2.45947	6.59745e-21	supported by AK068796
4352046	315.796	1092	-1.78904	1.76156e-20	supported by AK065509
4346084	668.768	1359.65	-1.024	2.80598e-20	supported by AK058714
4347074	1024.69	2420.23	-1.23983	3.13834e-20	supported by AK067949
9266164	130.737	578.258	-2.14267	4.19636e-20	ab initio prediction with EST support
4350112	0	337.011	-10.934	5.26023e-20	supported by AK072355
4339650	63.7833	419.673	-2.71342	1.24421e-19	supported by AK059883
4350117	0	316.042	-10.8419	1.3725e-19	supported by CI324222 and CI571965
9271141	89.5131	329.057	-1.8749	1.66206e-19	ab initio prediction with EST support
4343219	3583.92	8842.37	-1.30287	1.76913e-19	supported by AK066045
4350116	0	303.138	-10.781	1.81483e-19	supported by AK109807
4341272	43.1184	232.284	-2.42758	2.02305e-19	ab initio prediction with EST support
4330034	370.565	1447.18	-1.96487	2.06708e-19	supported by AK102817
4325348	4476.83	10702.7	-1.25731	2.48317e-19	supported by AK069734
novel.522	66.2835	259.554	-1.96599	3.68895e-19	PF01453:D-mannose binding lectin|PF08276:PAN-like domain|PF00069:Protein kinase domain|PF00954:S-locus glycoprotein domain
4330933	416.33	1284.12	-1.6239	3.92759e-19	supported by AK119261
4325823	380.129	1074.74	-1.49863	4.79271e-19	supported by AK065371
4348370	0	290.776	-10.7217	6.35486e-19	supported by AK064432
4339786	262.306	750.576	-1.5166	8.30965e-19	supported by AK067788
4346116	59.1291	298.973	-2.33262	1.25746e-18	supported by AK100297
4341281	468.38	1378.91	-1.55758	2.00518e-18	supported by AK121182
9270225	143.655	390.36	-1.44103	2.91917e-18	supported by CI420539 and CI647560
4333610	9397.06	19725.2	-1.06975	3.71447e-18	supported by AF010584
4329191	2432.23	6029.75	-1.30973	5.03207e-18	supported by AK064977
4351462	421.121	1114.74	-1.40386	5.33745e-18	ab initio prediction with EST support
4350120	56.7647	236.063	-2.05962	6.88946e-18	ab initio prediction with EST support
9267746	1783.14	4455.39	-1.32091	7.73102e-18	supported by CI027334 and CI295396
9266900	76.6759	280.947	-1.87139	9.23581e-18	supported by AK102076
4326880	101.969	303.596	-1.57421	9.35197e-18	supported by AK058673
4324873	34954.2	76580.3	-1.13151	9.6352e-18	supported by CI460651 and CI682433
novel.548	26.2292	163.931	-2.6374	1.05151e-17	PF00255:Glutathione peroxidase
4342381	8592.45	22709.3	-1.4021	1.15476e-17	supported by AK060737
4333744	271.484	746.882	-1.45874	1.21936e-17	supported by AK068538
4345521	598.501	2421.75	-2.0161	1.22992e-17	ab initio prediction with EST support
4328114	721.166	1627.8	-1.17495	1.33891e-17	supported by AK120237
9266737	0	211.525	-10.2623	1.67942e-17	Non-protein coding transcript%2C unclassifiable transcript~supported by CI013213 and CI291302
4349454	743.022	1551.67	-1.06259	1.84462e-17	supported by AK120979
4334714	909.58	2048.29	-1.17084	3.38589e-17	supported by AK068346
4329820	33.2634	251.827	-2.91602	3.39938e-17	supported by AK066288
4326579	51.4525	257.181	-2.32239	3.51373e-17	ab initio prediction with EST support
4341417	1689.91	4280.56	-1.34087	5.2023e-17	supported by AK061129
4334840	1434.27	2869.38	-1.00006	5.70319e-17	supported by AK061449
4325890	373.997	854.488	-1.19162	6.14412e-17	supported by AK066156
4348979	5479.4	14104.7	-1.36412	6.42294e-17	supported by AK120578
4338112	908.461	2440.58	-1.42528	6.83874e-17	supported by AK059729
4344909	877.803	2547.78	-1.53679	7.3601e-17	supported by AK120351
4330146	53.1742	225.719	-2.08503	7.91411e-17	supported by AK070741
4349141	206.157	509.542	-1.30437	1.11375e-16	supported by AK108163
4347650	325.595	1449.44	-2.15418	1.29209e-16	ab initio prediction with EST support
4327453	329.869	1137.98	-1.78578	1.67024e-16	supported by AK100241
4328793	2098.13	4600.09	-1.13267	1.98972e-16	supported by AK111620
9270490	605.885	1479.83	-1.28742	2.29258e-16	ab initio prediction with EST support
novel.243	125.406	332.331	-1.40596	2.84917e-16	PF06749:Protein of unknown function (DUF1218)
4350075	22.3263	142.084	-2.67599	3.4751e-16	supported by AK107711
4324648	60.4616	254.881	-2.07273	4.18673e-16	ab initio prediction with EST support
4350074	8.8359	106.733	-3.57642	4.42937e-16	ab initio prediction with EST support
4341496	5335.53	12953.9	-1.27966	4.88429e-16	supported by AK064989
4341942	739.874	2151.39	-1.53998	5.47646e-16	supported by AK105934
9270552	59.6249	344.473	-2.52927	5.86653e-16	Non-protein coding transcript%2C unclassifiable transcript~supported by CI406095 and CI635693
novel.1318	173.75	505.463	-1.53881	6.2795e-16	-
4331129	542.604	1307.43	-1.26912	7.514e-16	supported by AK061270
4343582	389.732	1026.57	-1.39688	8.19845e-16	supported by AK120618
9269831	0.938091	144.056	-7.26653	8.79138e-16	ab initio prediction with EST support
4324958	848.128	1882.85	-1.15019	9.33475e-16	supported by AK061917
4337884	16.9308	155.02	-3.1871	1.16109e-15	supported by CI561152 and CI776723
4348299	53.0011	192.516	-1.86107	1.35922e-15	supported by AK070442
4329656	170.408	463.346	-1.44453	1.64125e-15	supported by AK072247
4349205	426.848	889.271	-1.05967	1.89011e-15	ab initio prediction with EST support
4349712	101.586	519.524	-2.35171	2.35222e-15	ab initio prediction with EST support
4337890	2995.53	8984.49	-1.58445	2.48535e-15	supported by AK058438
4331490	902.218	2393.31	-1.40722	2.53676e-15	supported by AK066500
4337360	3547.74	8804.37	-1.31122	2.59343e-15	supported by AK072414
4327038	161.9	505.205	-1.64168	2.87647e-15	supported by AY327041
4335780	226.364	547.75	-1.27485	3.19233e-15	supported by AK121151
4344397	16988.1	34753	-1.03264	3.22179e-15	supported by AK068430
4329333	1219.36	2570.72	-1.07611	3.38771e-15	supported by AK120593
4326210	234.573	562.254	-1.25979	3.85549e-15	supported by AK120531
4344713	1442.94	3050.75	-1.08021	4.18415e-15	supported by AK111759
4348262	519.264	1053.53	-1.02006	5.49552e-15	supported by AK100514
4336246	475.919	1096.57	-1.20351	9.49384e-15	ab initio prediction with EST support
9269761	285.954	1101.23	-1.94419	1.02015e-14	Non-protein coding transcript%2C unclassifiable transcript~supported by AK060239
4336964	22.9823	123.324	-2.43042	1.05397e-14	ab initio prediction with EST support
4344028	100.361	290.016	-1.53075	1.35664e-14	supported by AK121089
4339025	100.28	454.963	-2.17796	1.75751e-14	ab initio prediction with EST support
4334753	5822.71	14873.5	-1.35296	1.99224e-14	supported by CI427545 and CI653697
4335736	291.221	667.169	-1.19497	2.02691e-14	supported by AK120702
4349296	594.247	1391.48	-1.22709	3.80893e-14	supported by AK068549
9271357	15.5029	102.641	-2.72189	3.88461e-14	supported by CI426799 and CI653049
4327585	588.317	1412.73	-1.26344	4.20815e-14	supported by AK103941
9270126	128.025	499.747	-1.96239	4.29898e-14	ab initio prediction with EST support
9266330	82.3756	322.784	-1.96746	5.19558e-14	Non-protein coding transcript%2C unclassifiable transcript~supported by AK069153
novel.629	62.06	335.433	-2.42908	6.88345e-14	-
4331022	1024.85	2083.92	-1.02337	1.07923e-13	supported by AK061459
9268915	51.1256	196.245	-1.94015	1.31578e-13	supported by CI486198 and CI706401
4331344	195.411	548.398	-1.48706	1.3276e-13	supported by AK099538
4331884	415.865	1219.71	-1.55216	1.5685e-13	supported by CI480183 and CI700666
4338119	109.348	353.735	-1.69081	1.75149e-13	supported by AK119556
4349747	276.25	745.248	-1.43072	2.24604e-13	supported by AK058585
4325587	11.2135	121.451	-3.4201	2.56454e-13	supported by AK072165
novel.1353	728.319	1605.35	-1.14053	3.09929e-13	PF02992:Transposase family tnp2|PF13963:Transposase-associated domain|PF13960:Domain of unknown function (DUF4218)|PF13952:Domain of unknown function (DUF4216)|PF03004:Plant transposase (Ptta/En/Spm family)
4336098	310.095	742.606	-1.25909	3.31442e-13	supported by AK119336
4328468	240.81	506.253	-1.07217	3.60162e-13	supported by AJ491818
4335844	2785.57	9168.87	-1.7186	3.61811e-13	supported by AK065331
novel.1356	14.9279	111.332	-2.91152	3.75461e-13	PF00854:POT family
4348246	680.81	1425.89	-1.06636	4.04651e-13	ab initio prediction with EST support
4330310	764.21	1534.95	-1.00602	4.31618e-13	supported by CI317036 and CI566592
4328171	180.924	404.615	-1.16231	4.45599e-13	ab initio prediction with EST support
9272168	239.074	788.905	-1.72119	4.80246e-13	supported by AK061494
novel.809	77.8114	296.791	-1.92699	7.1975e-13	PF02458:Transferase family
4336965	26.2694	162.343	-2.62833	8.73584e-13	supported by AK062781
4326853	3279.14	7153.51	-1.12527	9.57124e-13	supported by AK072082
9269956	134.272	325.694	-1.27776	1.31337e-12	supported by CI442812 and CI665896
4348082	1282.29	2832.65	-1.14321	1.74669e-12	ab initio prediction with EST support
4352768	172.72	606.576	-1.81127	1.87789e-12	supported by AK066826
4349102	369.685	886.779	-1.26195	2.04343e-12	supported by CI530229 and CI747868
4341376	88.9754	249.074	-1.48414	2.24234e-12	supported by AK067582
4326562	11097.9	23455	-1.07958	2.95496e-12	supported by AK105174
9272012	11.1623	82.7005	-2.88525	3.29923e-12	ab initio prediction with EST support
novel.450	55.8482	173.51	-1.63257	3.4883e-12	-
4332692	81.2284	266.346	-1.70976	3.54209e-12	supported by AK066439
4326442	1528.24	4702.11	-1.62133	3.65136e-12	supported by AK067670
4337456	720.217	1505.52	-1.06398	3.94777e-12	supported by AK066799
4334283	442.459	958.277	-1.11447	5.54601e-12	ab initio prediction with EST support
4351733	40.9319	182.721	-2.15284	5.68586e-12	ab initio prediction with EST support
4352619	375.188	878.883	-1.22724	5.80021e-12	supported by AK065535
9268960	9756.42	25697.7	-1.39718	6.27808e-12	supported by CI413924 and CI641971
4335934	207.252	601.643	-1.53743	6.41255e-12	supported by AK064925
4330896	134.007	323.819	-1.27202	6.43054e-12	supported by AK111093
4324832	100.086	347.933	-1.7942	6.46566e-12	supported by AK107439
4327304	12.0476	81.8518	-2.75609	7.61025e-12	supported by AK100770
4346594	60.5138	1315.78	-4.44076	1.01688e-11	supported by AK064764
4324644	6551.81	13549.3	-1.04818	1.01948e-11	supported by CI444648 and CI667402
4328654	24.8425	113.968	-2.19428	1.12127e-11	supported by AK107245
9267892	154.778	336.616	-1.12092	1.13872e-11	supported by CI527545 and CI745183
4348914	28.2287	152.081	-2.42761	1.16768e-11	supported by AK108805
novel.1520	186.993	415.993	-1.15223	1.43022e-11	PF03745:Domain of unknown function (DUF309)
4344421	465.903	943.716	-1.01736	1.46158e-11	supported by AK061172
4340434	61.4176	208.12	-1.75698	1.71624e-11	ab initio prediction with EST support
4337775	3389.55	7147.58	-1.07634	1.89418e-11	supported by AK099030
4332831	2045.93	5804.98	-1.50441	1.94067e-11	ab initio prediction with EST support
9272055	0	56.9321	-8.36913	2.51604e-11	Non-protein coding transcript%2C putative npRNA~supported by AK105579
4343518	400.757	860.926	-1.1024	2.68137e-11	supported by AK099888
9272054	956.316	1988.61	-1.05583	2.74929e-11	supported by AK111739
4348065	65.4401	269.503	-2.03966	3.18394e-11	supported by AK120072
4344902	291.11	732.062	-1.32909	3.48497e-11	supported by AK120197
4331941	251.316	672.959	-1.42057	4.49789e-11	ab initio prediction with EST support
4350970	33.9047	157.195	-2.21255	4.72414e-11	supported by AK107071
4340299	21.6302	108.859	-2.32739	4.91088e-11	supported by AK065263
4324820	193.988	403.269	-1.05582	5.0917e-11	supported by AK111988
9270868	184.658	465.155	-1.33171	5.17364e-11	supported by CI450176 and CI672404
4326087	444.056	1057.31	-1.25163	5.29673e-11	ab initio prediction with EST support
4349448	6779.1	15340.4	-1.17814	5.46764e-11	supported by AK062449
9270091	279.323	600.902	-1.10525	5.54542e-11	ab initio prediction with EST support
4327481	297.094	746.395	-1.32881	5.70174e-11	supported by AK121388
4329764	14.6698	81.8972	-2.48117	6.2693e-11	ab initio prediction with EST support
4335124	1059.47	2241.43	-1.08096	6.76818e-11	supported by AK060268
4346800	100.458	285.972	-1.50831	7.00137e-11	supported by AK066121
4332433	168.722	458.018	-1.44004	7.04955e-11	supported by AK121750
4335459	101.973	338.645	-1.72789	7.65501e-11	supported by AK121730
4347813	208.653	450.858	-1.11062	8.09393e-11	supported by AK108154
9266325	260.422	565.833	-1.11778	9.77024e-11	supported by AK121239
4330485	180.738	383.581	-1.08473	1.05671e-10	supported by AK063563
4341380	79.6972	338.072	-2.08172	1.11495e-10	supported by AK099816
9268327	8.87113	71.1569	-2.98946	1.17827e-10	supported by AK102103
4349144	57.7514	237.084	-2.03593	1.23039e-10	supported by AK109013
4327205	58.1554	179.936	-1.62648	1.31643e-10	supported by AK121893
novel.1020	117.933	326.723	-1.47027	1.44813e-10	PF12740:Chlorophyllase enzyme
4349896	687.164	1924.93	-1.48592	1.45963e-10	supported by AK067523
9266242	22.1861	95.9731	-2.11497	1.47903e-10	supported by AF456245
4335383	241.402	617.682	-1.35463	1.55305e-10	supported by AK067467
4334350	594.647	1199.84	-1.01298	1.59904e-10	supported by AK067369
4345509	54.1821	161.911	-1.57944	1.77634e-10	ab initio prediction with EST support
4334633	47.0425	186.003	-1.98673	1.7965e-10	supported by AK063312
4351697	66.123	198.338	-1.58068	1.82449e-10	supported by AK066052
4343470	58.7961	205.366	-1.80007	1.83934e-10	ab initio prediction with EST support
9271391	246.738	601.135	-1.28391	1.89216e-10	ab initio prediction with EST support
9267526	77.0577	207.545	-1.42715	1.93513e-10	supported by CI427149 and CI653362
4348986	186.141	422.274	-1.18188	1.95921e-10	supported by AK065202
4335662	80.1531	211.282	-1.39934	2.44814e-10	supported by AK063212
novel.200	359.793	814.02	-1.17709	2.48035e-10	PF00293:NUDIX domain
4336753	808.01	1722.83	-1.09203	2.60318e-10	supported by AK060559
3131486	563.293	1499.81	-1.412	2.64649e-10	-
4325014	18.9951	108.436	-2.5038	2.88665e-10	supported by CI533986 and CI751581
9267666	31342.7	81458	-1.37791	3.00292e-10	supported by CI434776 and CI659285
4348111	119.393	333.644	-1.47987	3.34183e-10	ab initio prediction with EST support
9268729	12.6946	114.278	-3.16643	3.81052e-10	Non-protein coding transcript%2C unclassifiable transcript~supported by AK102950
4346234	139.757	484.017	-1.79279	3.82396e-10	supported by AK072163
9272387	40.1772	173.564	-2.11268	4.18891e-10	supported by AK111130
4332935	160.613	383.267	-1.25471	4.31051e-10	supported by AK063289
4330464	433.727	1024.36	-1.23882	4.5764e-10	supported by AK121386
9270401	69.2739	200.42	-1.53111	4.80948e-10	supported by CI532153 and CI749781
4351433	209.433	435.652	-1.05648	4.95067e-10	supported by AK102656
4347340	198.249	463.384	-1.22434	5.17197e-10	supported by AK111541
4332309	2.48396	52.0506	-4.38469	5.54123e-10	supported by AK107381
4341892	236.013	544.071	-1.20482	6.44229e-10	ab initio prediction with EST support
4344351	64.7463	270.177	-2.06153	7.34628e-10	supported by AK107065
4351447	849.092	1789.43	-1.07513	7.38465e-10	Non-protein coding transcript%2C unclassifiable transcript~supported by AK066751
9269067	1393.18	2841.32	-1.02805	7.63179e-10	supported by AB112771
4328819	86.9486	221.552	-1.34936	8.0811e-10	supported by AK064586
4352610	42.8537	193.705	-2.17531	1.1053e-09	supported by CI530278 and CI747905
novel.1430	67.3318	202.411	-1.58868	1.10615e-09	-
4325812	816.001	1674.53	-1.03709	1.21509e-09	supported by AK065319
4324938	102.705	282.016	-1.45662	1.2624e-09	supported by AK065439
9267456	22.7251	101.752	-2.15367	1.32394e-09	supported by AK068031
4349388	128.414	309.274	-1.26688	1.43403e-09	supported by AK065404
4336456	10.0186	68.3308	-2.77259	1.82038e-09	supported by AK061581
4349359	222.046	449.753	-1.01764	1.87578e-09	supported by CI405288 and CI634984
9266688	196.352	426.57	-1.12007	1.96715e-09	supported by AK107450
4338107	28.5929	114.161	-1.99689	2.06994e-09	ab initio prediction with EST support
4343079	4.47808	49.0874	-3.47694	2.14542e-09	ab initio prediction with EST support
novel.590	4.68912	56.4844	-3.59182	2.15661e-09	-
9266561	2.67337	159.727	-5.87288	2.28881e-09	supported by CI447955 and CI670411
4337545	8.09088	56.1788	-2.7932	2.29195e-09	ab initio prediction with EST support
9271118	4.53127	53.6192	-3.53871	2.35739e-09	ab initio prediction with EST support
4335226	491.156	1165.53	-1.24636	2.54326e-09	supported by AK102155
3131408	256.32	580.636	-1.17829	2.74553e-09	-
4351164	20.2791	95.8188	-2.23213	3.04521e-09	ab initio prediction with EST support
4351034	87.1862	213.719	-1.29423	3.12578e-09	supported by AK059842
4346285	306.116	708.136	-1.20951	3.44497e-09	supported by AK121222
4348248	10.4861	77.9442	-2.88905	3.50855e-09	supported by AK068170
4350978	35.312	139.293	-1.97403	3.57646e-09	supported by AK071927
9269752	86.611	205.331	-1.2435	3.78215e-09	Non-protein coding transcript%2C unclassifiable transcript~supported by AK062976
4328761	49.4747	136.587	-1.46426	3.90858e-09	supported by AK122138
4342925	131.623	315.044	-1.26028	3.9483e-09	supported by AK108656
9271462	46.0982	168.066	-1.86268	3.95456e-09	ab initio prediction with EST support
9271091	28.1379	126.748	-2.16872	4.23275e-09	ab initio prediction with EST support
4326761	130.959	336.537	-1.36007	4.24513e-09	supported by AK065614
novel.1453	1.19795	42.2748	-5.09262	4.41644e-09	PF07714:Protein tyrosine kinase|PF00069:Protein kinase domain
4348081	20.6074	90.3335	-2.12463	4.62305e-09	supported by AK100609
4351328	61.0937	215.921	-1.81648	4.7337e-09	supported by CI432170 and CI656907
9266805	53.5445	203.369	-1.92198	4.77699e-09	Non-protein coding transcript%2C putative npRNA~supported by AK058488
novel.781	141.451	306.754	-1.11465	4.80706e-09	PF02902:Ulp1 protease family, C-terminal catalytic domain|PF13963:Transposase-associated domain
9269428	364.2	872.16	-1.25952	4.88519e-09	ab initio prediction with EST support
4345894	41.3347	138.962	-1.74523	5.70645e-09	supported by AK109668
4325589	292.605	781.711	-1.4168	5.78947e-09	supported by AK064938
novel.1256	353.043	787.172	-1.15551	5.80913e-09	PF00886:Ribosomal protein S16
novel.848	43.5009	192.02	-2.13766	5.95959e-09	PF04749:PLAC8 family
4339108	163.627	361.44	-1.14413	6.20044e-09	ab initio prediction with EST support
4343443	130.014	432.209	-1.73165	6.70646e-09	supported by AK099918
9272068	198.293	404.046	-1.02606	7.35523e-09	ab initio prediction with EST support
4324163	188.747	380.138	-1.01135	7.44947e-09	supported by AF015302
4325333	268.229	540.771	-1.01151	8.10186e-09	supported by AK111760
4330867	355.69	988.196	-1.47363	8.34416e-09	supported by AK102178
9270274	169.207	448.085	-1.40333	8.696e-09	supported by CI446332 and CI668795
4350979	238.526	2387.59	-3.32288	8.74686e-09	supported by AK067543
9269396	30.275	98.1878	-1.69842	8.87871e-09	ab initio prediction with EST support
9272245	113.383	387.545	-1.77253	9.15784e-09	ab initio prediction with EST support
4330101	47.4579	175.851	-1.88649	9.37779e-09	ab initio prediction with EST support
4326332	21.5282	87.1586	-2.01638	9.75813e-09	supported by AK111612
9270590	182.271	398.601	-1.12704	1.46178e-08	ab initio prediction with EST support
4324486	306.365	685.831	-1.16098	1.8012e-08	supported by AK068118
4336862	47.0469	160.889	-1.76925	1.81751e-08	supported by AK111730
9266676	31.5946	168.723	-2.4093	2.11785e-08	supported by CI406382 and CI635998
4347336	65.0556	195.99	-1.59052	2.26447e-08	supported by AK069281
novel.392	13.527	80.1595	-2.5586	2.27401e-08	-
4344337	249.011	552.957	-1.15007	2.45812e-08	supported by AK119424
4340417	95.8092	262.182	-1.44872	2.49274e-08	supported by AK063905
4338118	2845.55	21106.9	-2.89089	2.51307e-08	supported by AK105947
4324251	241.985	617.317	-1.34997	2.60607e-08	supported by AK068954
4339712	12.0659	63.0074	-2.38079	2.97444e-08	supported by AK106436
4346091	128.81	270.312	-1.06799	3.00181e-08	supported by AK069638
4331699	43.8904	137.258	-1.6469	3.0111e-08	supported by CI404928 and CI634519
4344659	46.5079	129.953	-1.47978	3.10894e-08	supported by AK065399
novel.589	230.853	557.096	-1.27053	3.20347e-08	-
4340018	26.8414	129.713	-2.26507	3.24607e-08	supported by AK070431
4329628	97.2273	223.583	-1.20295	3.3098e-08	supported by AK108711
4325682	117.809	379.851	-1.68744	3.32697e-08	supported by AK073435
9270328	3.01996	46.16	-3.90753	3.83012e-08	supported by AK067827
4343458	93.8957	215.041	-1.19485	3.92534e-08	supported by AK068052
novel.1117	0	26.1407	-7.24512	3.93024e-08	-
4335628	163.359	347.887	-1.08871	4.17505e-08	supported by AK103261
4346835	53.3321	155.167	-1.5364	4.30403e-08	supported by AK111655
4341221	113.498	330.587	-1.541	4.4383e-08	supported by AK108390
4344769	24.0829	102.277	-2.08202	4.51954e-08	ab initio prediction with EST support
9271183	13.5247	74.7962	-2.47192	4.7328e-08	Non-protein coding transcript%2C uncharacterized transcript~supported by CI563119 and CI778540
4344280	17.0122	76.699	-2.16631	4.90822e-08	supported by AF014469
9271562	3.14124	37.4302	-3.58165	4.96524e-08	ab initio prediction with EST support
4332439	26.098	113.923	-2.12335	5.45518e-08	supported by AK063845
9266710	35.8474	138.557	-1.94436	5.85633e-08	ab initio prediction with EST support
4329158	437.146	885.451	-1.01834	5.93433e-08	ab initio prediction with EST support
novel.1082	51.9972	177.109	-1.76446	6.03406e-08	-
4345064	1129.99	6557.21	-2.53664	6.28292e-08	supported by CI420112 and CI647145
4342655	168.986	338.755	-1.00195	6.36833e-08	Non-protein coding transcript%2C unclassifiable transcript~supported by AK100445
4332441	21.558	81.8994	-1.9265	6.53346e-08	supported by AB167397
4328021	174.144	358.726	-1.04086	6.8532e-08	supported by AK073056
4337742	363.77	741.948	-1.02709	7.05525e-08	supported by AK061521
4345844	19.3698	85.6854	-2.14708	7.93957e-08	supported by AK070025
4326709	145.273	302.933	-1.05845	8.16871e-08	supported by AK067417
4326098	150.992	329.605	-1.12451	9.20176e-08	ab initio prediction with EST support
4338085	61.4385	174.787	-1.51166	9.39708e-08	supported by AK108343
9272029	210.292	455.467	-1.11316	9.96943e-08	supported by AK070621
4349265	44.6144	116.887	-1.39013	1.02281e-07	supported by AK068088
4337397	27.7226	102.256	-1.88319	1.02332e-07	supported by AK121530
4336504	136.041	287.576	-1.0779	1.11633e-07	supported by CI444150 and CI666977
9269987	125.288	346.64	-1.46638	1.16883e-07	supported by CI438475 and CI662308
4324069	19.0794	81.5672	-2.09799	1.20013e-07	ab initio prediction with EST support
novel.1426	81.3874	289.953	-1.82979	1.23104e-07	-
9267774	56.9405	158.342	-1.47371	1.25052e-07	Non-protein coding transcript%2C putative npRNA~supported by AK119475
9271925	108.551	221.46	-1.02789	1.32236e-07	ab initio prediction with EST support
4338399	72.3434	202.575	-1.48211	1.36183e-07	supported by AK065965
novel.1370	41.7563	140.067	-1.74868	1.37682e-07	PF01476:LysM domain|PF07714:Protein tyrosine kinase
novel.407	29.075	99.844	-1.78251	1.5031e-07	PF01554:MatE
4350025	0	23.2725	-7.07781	1.50751e-07	ab initio prediction with EST support
4349064	103.711	292.737	-1.49683	1.55822e-07	supported by AK120420
4352905	38.0433	140.898	-1.88602	1.65459e-07	supported by AK068351
4324822	323.475	689.6	-1.09104	1.67889e-07	supported by AK070440
4333089	56.7694	147.794	-1.37737	1.73496e-07	supported by CI554902 and CI771077
9269452	130.533	281.789	-1.10742	1.85342e-07	Non-protein coding transcript%2C putative npRNA~supported by AK071496
4342395	9088.04	18870.6	-1.05405	1.87975e-07	supported by AK120691
4340307	128.265	309.036	-1.269	1.98743e-07	supported by CI059062 and CI307027
4344706	108.8	319.058	-1.55206	2.10391e-07	supported by AK069480
9269127	128.665	444.05	-1.78498	2.20633e-07	Non-protein coding transcript%2C unclassifiable transcript~supported by CI406929 and CI636519
4347775	85.6553	200.746	-1.22648	2.39561e-07	supported by AK067622
4326826	69.8401	177.492	-1.34644	2.54122e-07	supported by AY304538
novel.60	135.455	287.761	-1.08564	2.55526e-07	PF07716:Basic region leucine zipper
9270405	5.24272	44.6318	-3.08324	2.57643e-07	supported by AK059641
4333506	117.606	247.092	-1.07334	2.76615e-07	supported by AK099948
4339714	93.8418	215.345	-1.19911	2.79294e-07	supported by AK121528
4327466	89.132	268.969	-1.59105	2.80143e-07	supported by AK119400
9267054	0	22.0323	-7.00044	2.95346e-07	supported by AK108247
4339516	1950.5	8752.67	-2.16583	3.09517e-07	supported by CI026297 and CI294980
4338068	142.205	302.35	-1.08986	3.16871e-07	supported by AK069504
novel.530	0.607781	35.5486	-5.83691	3.19385e-07	-
4348064	66.8494	167.849	-1.32567	3.3619e-07	ab initio prediction with EST support
4349417	143.142	330.86	-1.2081	3.44422e-07	ab initio prediction with EST support
9270447	107.444	231.535	-1.10715	3.60606e-07	ab initio prediction with EST support
4331704	2.15298	32.1165	-3.88708	3.85332e-07	ab initio prediction with EST support
4329725	54.9213	161.076	-1.5574	3.96098e-07	supported by AK107418
4345256	112.14	232.066	-1.0477	4.09393e-07	supported by AK069354
4332319	175.651	359.754	-1.03521	4.3198e-07	supported by AK071135
9266173	50.7458	159.446	-1.64656	4.79286e-07	supported by CI406235 and CI635861
4341406	7.71108	66.2711	-3.09826	5.05044e-07	supported by AK073322
novel.800	37.6554	109.955	-1.54187	5.11655e-07	PF03552:Cellulose synthase
4341088	143.999	356.988	-1.30901	5.44876e-07	supported by AK067110
4334853	167.518	368.408	-1.13461	5.51699e-07	supported by AK061723
9267544	69.0656	184.395	-1.41305	5.51828e-07	Non-protein coding transcript%2C uncharacterized transcript~supported by AK108701
4339637	84.5909	182.874	-1.11429	5.70209e-07	supported by AK065748
4350963	158.067	385.101	-1.28313	6.49314e-07	supported by AK099444
4324297	10.6074	48.9634	-2.20707	6.62297e-07	supported by CI397972 and CI628407
4327621	189.363	425.335	-1.16603	6.82997e-07	supported by AB036883
4330172	124.335	259.988	-1.06301	7.07341e-07	supported by AK108827
9267537	41.3144	136.227	-1.71682	7.09831e-07	supported by AK106647
4326605	132.988	285.747	-1.10191	7.26367e-07	supported by AK112054
4350283	0.954365	30.0088	-5.00045	7.53986e-07	supported by CI526382 and CI744094
4339208	1.59737	28.6213	-4.18858	7.59349e-07	supported by CI312454 and CI563992
novel.859	65.7192	168.458	-1.35676	7.65738e-07	PF10551:MULE transposase domain|PF10536:Plant mobile domain|PF03108:MuDR family transposase|PF05754:Domain of unknown function (DUF834)
4340874	180.515	378.285	-1.06578	7.73746e-07	supported by AK058338
4326099	403.639	819.488	-1.02153	7.91153e-07	supported by AK120089
4350428	6.68559	152.518	-4.50381	8.23875e-07	supported by AK108232
4350318	76.6965	163.948	-1.0952	8.48716e-07	supported by AK061209
4334722	165.643	407.225	-1.29746	8.98938e-07	supported by CI449026 and CI671315
4329851	41.1303	134.103	-1.70303	9.0583e-07	supported by AK111339
4326620	67.3362	160.309	-1.2496	9.48096e-07	supported by AK106731
4342160	101.1	205.458	-1.0226	9.56341e-07	supported by AK064258
4328015	51.934	134.582	-1.37528	9.66979e-07	supported by AK102217
4350850	130.774	353.976	-1.437	1.00324e-06	ab initio prediction with EST support
4327536	16.0904	76.2974	-2.24147	1.02867e-06	supported by AK071286
4329156	2.53546	47.8459	-4.24789	1.07468e-06	supported by CI405706 and CI635371
4346820	1.80573	30.3394	-4.03712	1.23723e-06	ab initio prediction with EST support
4341870	111.898	285.265	-1.34726	1.26875e-06	supported by AK068614
9271423	112.38	254.494	-1.17776	1.28837e-06	supported by AK066152
4345071	72.0598	177.455	-1.3012	1.31586e-06	supported by AB037416
9266321	1261.24	5177.67	-2.03736	1.3187e-06	supported by AK100744
4352305	49.9553	175.487	-1.80954	1.32243e-06	ab initio prediction with EST support
9272470	1.56349	31.1888	-4.3194	1.39093e-06	Non-protein coding transcript%2C unclassifiable transcript~supported by CI454162 and CI676168
4346618	14.6725	66.604	-2.18386	1.41313e-06	supported by AK069582
4330149	189.866	402.054	-1.08262	1.46688e-06	supported by AK060824
4344407	46.9489	141.124	-1.58506	1.47376e-06	ab initio prediction with EST support
4347417	94.8051	265.949	-1.48666	1.49058e-06	supported by AK109548
4329983	9924.96	19955.4	-1.00762	1.56332e-06	supported by AK065018
9267632	167.017	341.535	-1.03131	1.60789e-06	supported by CI372184 and CI610481
novel.668	16.0761	61.3416	-1.92655	1.62992e-06	PF03638:Tesmin/TSO1-like CXC domain, cysteine-rich domain
4342237	83.4947	215.747	-1.36827	1.76793e-06	ab initio prediction with EST support
4335072	66.9794	165.792	-1.30659	1.80657e-06	supported by CI404622 and CI634242
4335777	61.1597	143.387	-1.2308	1.87543e-06	supported by CI559849 and CI775543
4338146	232.226	496.288	-1.09436	2.05657e-06	supported by AK067770
4337270	29.0096	94.0022	-1.69244	2.10544e-06	supported by AK111108
4346321	67.8249	448.374	-2.7239	2.13953e-06	supported by AK107230
4344427	492.015	1089.01	-1.14593	2.16222e-06	supported by AK067246
novel.647	3.9411	36.1453	-3.17563	2.28334e-06	PF06749:Protein of unknown function (DUF1218)
4349249	144.626	291.915	-1.01213	2.38491e-06	supported by AK065456
4326398	1.52759	33.5418	-4.43437	2.39869e-06	supported by AK103593
9270658	35.7952	92.7467	-1.37237	2.4358e-06	supported by AK069963
4338879	77.4754	175.93	-1.18274	2.50427e-06	supported by AK101162
4324561	385.402	821.867	-1.0921	2.53382e-06	supported by AK067541
4349078	7.98855	58.0257	-2.85196	2.67533e-06	supported by AK060639
4330409	177.695	372.618	-1.06655	2.6923e-06	supported by AK121757
4327344	33.2302	103.981	-1.63944	2.7012e-06	ab initio prediction with EST support
4330427	112.269	226.837	-1.01197	2.75776e-06	supported by AK108578
4330254	21.3367	72.0048	-1.75889	2.91723e-06	supported by AK058849
4340664	7.46549	44.7357	-2.58143	2.9752e-06	supported by AK071531
4346235	58.8174	147.734	-1.3273	3.01497e-06	supported by AK102208
4339836	167.158	468.092	-1.48524	3.06698e-06	supported by AK099468
9270770	28.1921	83.2151	-1.55912	3.10339e-06	supported by CI003917 and CI286251
novel.381	46.2863	127.652	-1.46045	3.17891e-06	-
novel.592	41.3154	106.254	-1.36229	3.28254e-06	PF00069:Protein kinase domain|PF01453:D-mannose binding lectin
4340184	3.33399	39.4658	-3.54293	3.39972e-06	supported by AB062676
4338246	32.8328	115.605	-1.81076	3.53908e-06	supported by AK065555
4348268	142.421	310.718	-1.12362	3.55465e-06	supported by AK103839
4351792	154.259	314.147	-1.02662	4.04843e-06	supported by AK063060
novel.1216	31.9601	89.3568	-1.48125	4.07613e-06	-
9270460	1.84029	28.8147	-3.95145	4.26267e-06	Non-protein coding transcript%2C unclassifiable transcript~supported by CI357719 and CI598813
9272635	10.4698	51.5414	-2.29283	4.27926e-06	Non-protein coding transcript%2C unclassifiable transcript~supported by CI418809 and CI646026
novel.957	7.04912	40.0477	-2.4945	4.46891e-06	-
4325527	31.669	96.1423	-1.60101	4.62091e-06	ab initio prediction with EST support
4335140	16.0229	56.5541	-1.82335	4.70301e-06	supported by AK073556
4352911	24.9435	79.9517	-1.68161	5.22544e-06	ab initio prediction with EST support
4324630	69.9421	146.586	-1.06548	5.22988e-06	supported by AK111087
9271712	70.9852	149.128	-1.07082	5.28954e-06	ab initio prediction with EST support
4329167	101.948	223.135	-1.13216	5.89901e-06	supported by AK121840
novel.187	11.1962	52.3765	-2.22493	5.91515e-06	PF02183:Homeobox associated leucine zipper|PF00046:Homeobox domain
4347757	15.8488	56.2585	-1.82632	6.15636e-06	ab initio prediction with EST support
9266708	28.0522	90.3385	-1.68679	6.21433e-06	supported by CI436639 and CI660942
4344276	63.2416	158.268	-1.32382	6.27267e-06	supported by AK072862
9267450	171.941	349.567	-1.02238	6.44973e-06	supported by AK068148
4332134	160.664	326.224	-1.02045	6.71355e-06	supported by AB206579
novel.122	21.5438	91.9112	-2.08262	6.92325e-06	-
4344243	36.6143	126.345	-1.78206	7.28116e-06	ab initio prediction with EST support
4326067	156.119	326.731	-1.06563	7.38512e-06	ab initio prediction with EST support
4346135	4.49502	35.0492	-2.98567	7.77392e-06	supported by AY177701
4340648	64.9288	165.202	-1.34404	7.85391e-06	ab initio prediction with EST support
4352074	132.499	280.241	-1.08221	8.23674e-06	supported by AK067230
4325261	76.3316	153.003	-1.0034	8.45223e-06	ab initio prediction with EST support
4332283	315.842	737.713	-1.22356	8.57345e-06	ab initio prediction with EST support
4337415	37.4942	95.5435	-1.35143	8.68719e-06	supported by AK103940
4333118	16.7191	57.6302	-1.78011	8.72292e-06	ab initio prediction with EST support
4331501	36.0285	157.909	-2.12812	9.04208e-06	supported by AK120826
4333177	1669.9	3628.9	-1.11979	9.20557e-06	ab initio prediction with EST support
4346706	15.3968	55.2245	-1.84786	9.45943e-06	supported by CI390233 and CI623383
9269068	45.7765	125.018	-1.45061	9.51861e-06	Non-protein coding transcript%2C unclassifiable transcript~supported by AK073710
4327062	26.0222	74.0377	-1.50486	9.79521e-06	supported by AK062753
4350295	370.286	850.112	-1.19905	9.87357e-06	supported by AK072702
4335063	1538.5	3299.46	-1.10052	1.05465e-05	supported by AK121124
4347219	106.057	256.553	-1.27215	1.05635e-05	supported by AK059044
4342809	20.0687	67.2156	-1.74021	1.07859e-05	ab initio prediction with EST support
4352638	67.3345	152.965	-1.18422	1.19826e-05	supported by AK071206
4347032	9.37689	48.1757	-2.36257	1.31171e-05	supported by CI042073 and CI301962
4347987	9.53139	48.1334	-2.34738	1.33516e-05	supported by CI428375 and CI653994
4339507	71.5867	165.486	-1.20606	1.41344e-05	supported by AK102181
4329175	82.3525	177.079	-1.10725	1.55089e-05	supported by AK065792
4346183	135.046	321.858	-1.25138	1.62145e-05	supported by AK065693
4336748	30.712	80.851	-1.39445	1.62314e-05	supported by CI025870 and CI294813
4343401	68.1012	141.624	-1.05592	1.64062e-05	supported by AK072131
4351481	44.8746	109.327	-1.28052	1.68399e-05	ab initio prediction with EST support
novel.398	108.779	219.052	-1.00846	1.6961e-05	PF03578:HGWP repeat
novel.517	73.1354	513.816	-2.81149	1.7265e-05	-
4350727	112.877	229.76	-1.02306	1.73291e-05	supported by AK110844
4331456	86.8966	200.569	-1.20466	1.73428e-05	supported by AK119960
4337059	37.1307	94.234	-1.34549	1.90684e-05	supported by AY224500
novel.1063	25.4991	76.7073	-1.58698	1.91037e-05	-
novel.791	43.903	125.734	-1.51398	1.94133e-05	-
novel.1220	108.366	290.057	-1.41786	1.95229e-05	-
4347426	26.6998	71.7661	-1.42461	2.01772e-05	supported by AK070460
4338940	18.5394	59.9219	-1.69517	2.05556e-05	supported by AK103871
9272560	36.7847	87.9918	-1.25856	2.05845e-05	Non-protein coding transcript%2C uncharacterized transcript~supported by AK106626
4339913	50.9471	118.253	-1.21473	2.06818e-05	ab initio prediction with EST support
9270666	31.8225	89.7425	-1.49282	2.07037e-05	supported by CI446701 and CI669299
4325293	31.5427	87.257	-1.46992	2.10592e-05	supported by AK071819
4329995	87.787	183.355	-1.06115	2.13615e-05	supported by AK058997
9271063	47.0588	121.19	-1.36339	2.17506e-05	supported by CI527196 and CI744845
4337118	12.3271	52.0261	-2.0728	2.19045e-05	ab initio prediction with EST support
4326047	78.3975	169.648	-1.1123	2.23804e-05	supported by AK109465
9272172	27.4285	79.3026	-1.5272	2.24287e-05	supported by AK070640
4333657	62.0331	144.06	-1.21473	2.24379e-05	supported by AK066202
4327616	28.3364	84.3824	-1.57318	2.2464e-05	supported by AK065060
9269662	18.7139	57.4368	-1.61803	2.26282e-05	Non-protein coding transcript%2C unclassifiable transcript~supported by AK112110
4341004	53.0725	122.699	-1.20572	2.28419e-05	supported by AK107497
9272453	41.4769	102.254	-1.2992	2.30466e-05	supported by CI463664 and CI685312
4327747	32.2542	101.897	-1.65584	2.31426e-05	supported by CI553370 and CI769665
novel.656	43.2241	100.176	-1.21113	2.43006e-05	-
4327356	7.30863	68.1992	-3.2275	2.45579e-05	ab initio prediction with EST support
4350320	3.69752	26.0935	-2.80884	2.57822e-05	supported by AK109882
9271310	50.4463	111.382	-1.14577	2.59101e-05	ab initio prediction with EST support
4331422	19.4121	77.0041	-1.98479	2.59163e-05	supported by AK069220
4340333	16.9769	59.3005	-1.79887	2.6001e-05	supported by AK109842
4327073	7.15346	35.0389	-2.2891	2.63697e-05	supported by CI026916 and CI295243
4345821	46.7664	104.921	-1.16913	2.67801e-05	ab initio prediction with EST support
9267438	36.903	103.828	-1.49005	2.96607e-05	supported by AK120829
4334501	42.7206	96.8475	-1.17995	3.11395e-05	supported by AK073074
4351505	2.11776	22.8599	-3.40472	3.11642e-05	supported by AK108734
9269013	55.7731	133.49	-1.25607	3.21641e-05	supported by CI322380 and CI570464
4350473	5.27795	29.7799	-2.49443	3.25961e-05	supported by AK072925
4344693	3.97633	54.6059	-3.76819	3.26661e-05	supported by AK063249
4338677	26.1438	90.812	-1.79283	3.33183e-05	ab initio prediction with EST support
9266337	0.885253	20.4439	-4.46797	3.33455e-05	supported by AK065753
novel.867	34.4942	83.0775	-1.26536	3.39349e-05	-
4330063	22.8487	68.7757	-1.59134	3.43587e-05	supported by CI464261 and CI685719
9272567	86.9454	175.284	-1.01073	3.81642e-05	supported by AK105917
novel.1454	12.3989	58.6222	-2.23891	3.9699e-05	-
4340185	6.3729	45.5488	-2.82362	4.07451e-05	supported by AB052944
4332124	15.8159	79.0221	-2.31063	4.11668e-05	supported by AK111731
4325964	47.5703	113.014	-1.24483	4.45157e-05	supported by AK120968
4339558	9.93318	46.6367	-2.2279	4.5064e-05	supported by AK069462
4336457	20.5213	68.3134	-1.72705	4.59898e-05	supported by AK099545
4330915	0.885253	23.5116	-4.67735	4.67438e-05	ab initio prediction with EST support
novel.1091	4.70405	27.6716	-2.55918	4.70438e-05	-
4337686	98.9056	235.061	-1.24732	4.9429e-05	supported by AK119748
4328711	24.812	75.6579	-1.60535	5.02723e-05	supported by AK062445
novel.788	15.675	49.2741	-1.65612	5.05242e-05	PF01554:MatE
4332734	149.249	301.484	-1.01416	5.26749e-05	ab initio prediction with EST support
novel.169	69.977	141.78	-1.0164	5.57059e-05	-
4341625	37.4336	268.522	-2.84366	5.74693e-05	ab initio prediction with EST support
9272619	47.5158	105.226	-1.14468	5.88155e-05	Non-protein coding transcript%2C uncharacterized transcript~supported by CI450397 and CI672625
4324020	48.2212	108.265	-1.16659	6.3366e-05	supported by AK105301
4335824	78.5281	174.605	-1.15352	6.59651e-05	ab initio prediction with EST support
4339882	51.2824	110.481	-1.10536	6.61922e-05	supported by AK066989
4327297	471.835	1579.2	-1.74288	6.81754e-05	supported by AK100363
novel.1146	30.0401	106.719	-1.82436	6.85126e-05	-
4339319	5.52086	32.3128	-2.53868	7.22436e-05	supported by AK107721
4351798	17.0105	57.2601	-1.75698	7.32239e-05	supported by AK062469
novel.316	16.8025	52.6447	-1.64766	7.61987e-05	-
novel.70	20.3468	66.3435	-1.70183	7.67407e-05	PF01554:MatE
novel.1540	107.433	685.371	-2.67244	7.97217e-05	-
4330580	78.4033	164.69	-1.06829	8.37805e-05	supported by AK065888
4343861	13.8919	54.8046	-1.97567	8.49517e-05	supported by AK106797
4347475	0.312697	24.2258	-6.17086	8.53378e-05	supported by AK102245
9267715	57.9836	121.807	-1.06739	8.54806e-05	supported by AK107097
4332448	96.2337	194.36	-1.01342	8.75139e-05	supported by AK067596
novel.1289	23.9875	68.0625	-1.51023	9.12972e-05	PF12274:Protein of unknown function (DUF3615)
4334886	19.1306	61.4758	-1.67859	9.13689e-05	supported by AK100972
4342946	63.2223	128.906	-1.02807	9.2907e-05	supported by AK062503
4345793	15.0326	49.2222	-1.71427	9.94075e-05	supported by AK064041
9270697	181.058	1615.19	-3.15678	0.000100204	supported by CI489433 and CI709379
9267447	30.8004	82.9711	-1.425	0.000100589	supported by AK067220
novel.797	2.69098	27.4115	-3.32027	0.000104346	-
4346825	22.1539	64.7146	-1.54054	0.000106315	ab initio prediction with EST support
4333943	9.28749	36.1004	-1.95265	0.00010737	supported by CI069245 and CI309482
4347289	20.2086	67.8557	-1.73853	0.000113172	supported by AK102328
4326149	28.9568	78.3603	-1.43169	0.000113315	supported by AK109339
4345065	36.2637	94.2655	-1.37317	0.000115163	supported by AK111640
4330791	44.6856	96.8998	-1.11662	0.000115202	supported by AK107898
4335117	7.83071	149.265	-4.24616	0.000119906	ab initio prediction with EST support
4350276	3.38549	23.5185	-2.78682	0.000120395	ab initio prediction with EST support
9268028	36.6595	90.8281	-1.30779	0.00012444	ab initio prediction with EST support
9266463	0	10.171	-5.88481	0.000127067	Non-protein coding transcript%2C unclassifiable transcript~supported by CI403221 and CI633211
4345982	8.69799	36.3719	-2.0635	0.000128864	supported by CI524221 and CI742047
4325260	5.29489	27.6126	-2.38394	0.000130039	supported by AK100754
4340351	17.0819	56.0277	-1.71172	0.000131555	ab initio prediction with EST support
4332344	4.58344	26.1085	-2.49437	0.000131807	ab initio prediction with EST support
4328262	1.82334	19.8998	-3.42652	0.000131984	supported by AK066900
4347113	25.2666	97.1141	-1.93958	0.0001353	supported by AK105859
4329010	60.8975	133.451	-1.13472	0.000141951	supported by AK120092
4351158	37.5623	98.165	-1.39052	0.000144993	ab initio prediction with EST support
4351814	22.9657	63.3555	-1.46345	0.000147977	supported by CI556545 and CI772600
4330689	1.89179	25.2973	-3.74667	0.000151775	supported by AK073562
9271212	5.60625	30.1723	-2.42588	0.000155371	ab initio prediction with EST support
4337529	91.4538	243.094	-1.4103	0.000161429	supported by AK064690
4340582	3.71513	23.4016	-2.64781	0.00016263	supported by CI421762 and CI648684
4334783	37.5189	88.7083	-1.24022	0.000165437	supported by AK065798
9266373	3.95738	28.9471	-2.85501	0.00018662	supported by CI479282 and CI699860
9266156	126.185	260.906	-1.04581	0.000190268	Non-protein coding transcript%2C uncharacterized transcript~supported by CI460148 and CI681921
4350744	38.8334	84.6466	-1.12341	0.000191323	supported by AK064398
9266317	90.9557	236.961	-1.38043	0.000192136	supported by AK121958
9267263	74.5994	153.084	-1.03336	0.000194923	ab initio prediction with EST support
9266552	11.0238	43.9507	-2.00233	0.000197143	ab initio prediction with EST support
4342502	35.1359	77.2242	-1.13447	0.00019903	Non-protein coding transcript%2C unclassifiable transcript~supported by AK067067
4340381	11.9253	43.5157	-1.87376	0.000206565	supported by AK062548
9271459	32.1339	75.385	-1.22588	0.000210062	supported by AK067425
9268709	25.0569	76.2825	-1.60345	0.000212058	supported by CI409151 and CI638178
9270756	16.1289	47.1738	-1.54549	0.000213065	ab initio prediction with EST support
4350096	19.2323	55.8536	-1.53645	0.000216769	supported by AK109713
9267633	1.54587	18.418	-3.56517	0.000217865	supported by AK072622
novel.1447	5.36467	26.6878	-2.32395	0.000218552	PF04970:Lecithin retinol acyltransferase
4346241	41.5051	91.4028	-1.14103	0.000224246	ab initio prediction with EST support
9266053	17.377	48.8194	-1.48853	0.000224867	Non-protein coding transcript%2C putative npRNA~supported by AK120110
novel.874	56.3703	139.089	-1.30143	0.000227186	PF01852:START domain|PF08670:MEKHLA domain
4348682	21.246	58.2472	-1.45728	0.000228426	supported by AK065574
4334949	39.1664	103.222	-1.39269	0.000228529	supported by AK064965
4346109	27.7605	69.5911	-1.32669	0.000232055	ab initio prediction with EST support
4347205	6.52807	28.1913	-2.10826	0.000238462	supported by AY559046
9266474	11.1095	41.8073	-1.90719	0.000245085	ab initio prediction with EST support
4329920	47.1281	130.699	-1.47139	0.000256229	supported by AK064754
novel.1149	22.7583	62.8133	-1.45933	0.000264219	-
novel.401	5.55542	26.0215	-2.22089	0.000275652	-
4324074	21.5807	68.1928	-1.65762	0.000277192	supported by AK106595
novel.1015	0	12.6514	-6.19901	0.000281438	-
4347709	57.0283	317.349	-2.47501	0.000285287	supported by AK060036
4343616	6.75337	122.782	-4.18076	0.00028576	supported by AK121213
4339942	59.2022	130.641	-1.14316	0.000294459	supported by AK065857
4334951	7.0654	46.3693	-2.70554	0.000299587	ab initio prediction with EST support
9267322	2.43113	19.9767	-3.01842	0.00030767	supported by CI461938 and CI683531
4337229	1752.53	6444.15	-1.87849	0.000311686	supported by AK121820
4330520	7.06473	32.1115	-2.17756	0.000326971	supported by AK059816
4326408	12.7095	50.553	-1.98655	0.000330391	supported by AK071182
4352837	38.2585	81.4274	-1.09247	0.000332638	supported by AK103828
4333404	0.312697	12.612	-5.23354	0.000333232	ab initio prediction with EST support
4330300	5.0513	24.3487	-2.27791	0.000336269	supported by AK065315
novel.99	9.77265	52.2204	-2.4078	0.000340743	-
4337102	0.625394	15.0603	-4.59379	0.00035374	ab initio prediction with EST support
4327572	12.6574	41.3102	-1.70022	0.000365713	supported by AK064237
4327455	36.8589	90.8388	-1.29973	0.000368721	supported by AK109941
novel.146	25.7769	64.4611	-1.32636	0.000368976	PF12854:PPR repeat|PF13041:PPR repeat family|PF05078:Protein of unknown function (DUF679)
novel.123	41.2872	255.464	-2.62717	0.000373371	PF07690:Major Facilitator Superfamily
4327672	49.2005	103.269	-1.06902	0.00037925	supported by AK072799
4350182	1.21556	16.6533	-3.7502	0.00038261	supported by AK105539
9267569	0.607781	14.7171	-4.56955	0.000383363	Non-protein coding transcript%2C hold transcript~supported by CI431605 and CI656425
4345156	4.11455	25.4227	-2.63954	0.000384369	supported by AK106439
4339261	0	8.6922	-5.6598	0.000394933	ab initio prediction with EST support
9269553	5.93723	26.3021	-2.14635	0.000400563	supported by CI447876 and CI670293
9269307	0.590169	15.6791	-4.67265	0.00040949	ab initio prediction with EST support
novel.414	73.6535	416.744	-2.49912	0.000450057	-
4336791	23.2804	56.4077	-1.27414	0.000452138	supported by AK106629
4337576	35.7941	77.7287	-1.12124	0.000461341	supported by AY335486
4330221	4.72033	25.4597	-2.43689	0.000470264	supported by AK103391
4342943	19.965	56.7213	-1.50097	0.000481866	supported by AK100175
4344040	47.1021	102.734	-1.12782	0.000482517	supported by AK067595
4338022	0	8.69475	-5.65993	0.000488425	supported by AK061489
4334882	34.8252	76.2451	-1.13007	0.000497237	ab initio prediction with EST support
4328772	97.0115	201.992	-1.05618	0.000498199	supported by AK066213
4325368	0	8.13768	-5.56127	0.000548302	supported by AK111325
4345960	0	8.07314	-5.5514	0.000558942	supported by AK106964
4326329	26.404	62.0503	-1.23238	0.000581572	ab initio prediction with EST support
4344364	41.5786	84.7106	-1.02392	0.00059068	supported by AK108269
novel.139	6.14492	26.4068	-2.09384	0.000599908	-
4335828	3.69752	23.0935	-2.63629	0.000611396	ab initio prediction with EST support
4329882	23.9021	59.7188	-1.32601	0.000613667	supported by AK111074
novel.1400	45.5133	93.6013	-1.03963	0.000621159	-
4332676	17.5	49.6667	-1.49728	0.000622047	supported by AK108260
4340812	13.1571	40.6939	-1.63287	0.000623231	supported by AK072192
4324397	19.5131	50.7655	-1.3757	0.000628707	supported by AK066764
novel.337	1.23318	15.3263	-3.62687	0.000630643	-
4325177	4.35814	22.8252	-2.38831	0.000633115	supported by AK109645
4330886	45.5332	93.5812	-1.04068	0.000642761	ab initio prediction with EST support
4349643	13.2113	64.5063	-2.27745	0.00064543	ab initio prediction with EST support
9272361	16.7672	47.487	-1.50036	0.000652698	supported by CI454602 and CI676631
4333566	78.7226	164.193	-1.05909	0.000659232	supported by AY838899
4336022	13.2638	44.3008	-1.73502	0.000668179	ab initio prediction with EST support
9267469	8.28096	30.6819	-1.87894	0.000668958	supported by AK099422
9267146	35.8835	89.8526	-1.32916	0.000681928	supported by AK100992
4324272	0.590169	14.2869	-4.53455	0.00070185	supported by AK105195
9267411	10.8171	35.5935	-1.71297	0.000730756	supported by CI441946 and CI665112
4339774	46.9981	94.5907	-1.00785	0.000743076	supported by AK073047
4345101	28.0599	75.3275	-1.42	0.000744039	supported by AK108811
4338921	74.5885	155.571	-1.05718	0.000754094	supported by AK068179
9271251	31.1074	67.021	-1.10589	0.00076337	tRNA-Gln
9270398	3.94043	31.5682	-2.98468	0.000773884	ab initio prediction with EST support
4331042	17.5698	51.4933	-1.54428	0.000789537	supported by AK107538
9266636	379.979	1262.8	-1.73241	0.000799309	supported by AK065109
9268092	4.47875	25.5496	-2.52888	0.000811026	ab initio prediction with EST support
4325124	76.783	173.71	-1.17659	0.000841512	supported by AK071545
novel.883	12.6025	42.9362	-1.76375	0.000841979	-
4350556	24.8591	60.4591	-1.28709	0.000845497	supported by AK071051
4346719	80.1628	170.606	-1.08794	0.000856224	supported by CI562803 and CI778251
4349229	19.239	53.7827	-1.47985	0.000878781	supported by AK105216
4336472	33.6259	69.5661	-1.04737	0.000881372	supported by AK107680
4338137	9.55204	46.4909	-2.27916	0.000893206	supported by AK106308
9266848	37.2906	83.7519	-1.16412	0.000893998	supported by AK101925
4338605	38.0901	79.1182	-1.05078	0.00092921	ab initio prediction with EST support
4331947	178.006	379.33	-1.09043	0.000935069	supported by AK102651
4344402	23.6605	61.0058	-1.36013	0.000941795	ab initio prediction with EST support
4338787	7.77818	48.5041	-2.63713	0.000971145	supported by AF402803
4343779	0	7.62842	-5.47186	0.000984501	supported by AK105325
4341697	35.4998	76.8317	-1.10959	0.0010025	supported by AK108530
4327169	12.656	41.0313	-1.68904	0.00100291	supported by AK121359
4348944	26.5954	61.3816	-1.20405	0.00101582	ab initio prediction with EST support
4334259	6.337	31.728	-2.30509	0.00103018	supported by AK106660
9267087	96.5785	197.794	-1.03136	0.00104164	supported by CI471323 and CI692071
4343431	2.3959	18.336	-2.9052	0.0010543	ab initio prediction with EST support
4338967	15.5015	44.6884	-1.52503	0.00106859	supported by AK102413
4349514	7.46549	27.3039	-1.86729	0.00107123	supported by AK108346
4338559	31.4892	66.4541	-1.0765	0.00107198	supported by AK101228
4330643	23.7174	67.8551	-1.51009	0.00108159	supported by CI317928 and CI567140
4342418	2.96846	22.6981	-2.90241	0.00111448	ab initio prediction with EST support
9270593	35.7752	75.6954	-1.08308	0.0011342	Non-protein coding transcript%2C unclassifiable transcript~supported by AK105452
9269369	110.823	232.875	-1.06931	0.00113659	supported by CI475404 and CI696223
9268453	45.3771	96.2122	-1.08473	0.00114742	ab initio prediction with EST support
4328043	3.68057	19.4793	-2.3903	0.00116784	supported by AK069727
4330630	1.57976	13.9617	-3.15811	0.00117186	supported by AK107003
9266052	14.2697	39.1032	-1.45146	0.00117405	supported by AK108287
4347611	71.378	173.83	-1.28561	0.00119722	supported by AK109462
4347764	25.653	64.3838	-1.32941	0.00120897	supported by AK062365
9267607	38.85	79.506	-1.03447	0.00122599	supported by AK109906
9268161	2.11776	15.8505	-2.87908	0.00125468	supported by AK062488
4334504	15.9009	40.848	-1.36139	0.0012706	supported by AK067603
9267668	8.36835	28.5916	-1.76815	0.00127952	supported by AK101433
9266951	3.69752	27.492	-2.88507	0.00130514	supported by CI419484 and CI646611
novel.794	14.8585	45.611	-1.61745	0.0013351	-
3131460	36.7682	76.0214	-1.0443	0.00138279	-
4347225	2.69098	19.0444	-2.79302	0.00138692	supported by AK058296
4330338	0.937422	11.6796	-3.64013	0.0013991	supported by AK072580
4336788	9.879	31.363	-1.6605	0.00140138	supported by AK105286
4329292	0.955034	12.4725	-3.7247	0.00142367	supported by CI367670 and CI606414
novel.1188	31.5271	65.8877	-1.06394	0.00146195	-
novel.1016	0	9.15917	-5.73276	0.00147155	PF01474:Class-II DAHP synthetase family
4351438	5.25966	27.4449	-2.37527	0.00151095	ab initio prediction with EST support
4340371	5.15733	26.3645	-2.3389	0.00166501	supported by CI343982 and CI589265
novel.34	12.4653	37.3857	-1.58393	0.00171785	-
4338741	37.3576	74.9225	-1.00619	0.00172431	supported by AK064244
4324826	6.19976	31.9885	-2.36155	0.00175276	supported by AK105944
4336410	9.27256	33.0603	-1.8274	0.00183949	supported by AK066885
4347052	8.36768	27.6697	-1.72341	0.00189284	ab initio prediction with EST support
4343766	31.997	71.6372	-1.15829	0.0019126	supported by AK103183
9268074	37.3959	80.4702	-1.10395	0.0019603	ab initio prediction with EST support
4343777	42.2934	97.0237	-1.19915	0.00198356	supported by CI482698 and CI703035
9266938	2.46501	17.2917	-2.79728	0.00199874	supported by AK119340
4336390	128.851	278.256	-1.10876	0.00203521	ab initio prediction with EST support
novel.33	29.4784	64.153	-1.12575	0.00207218	-
novel.1410	0.607781	16.7769	-4.76032	0.00207543	PF05678:VQ motif
4334592	44.2868	106.149	-1.25898	0.00208979	supported by AK068861
9268238	4.37508	19.934	-2.18657	0.00210636	ab initio prediction with EST support
4324262	26.0923	58.8664	-1.17897	0.0021137	supported by AK071739
9270603	0.902866	13.208	-3.83577	0.00215522	supported by CI516956 and CI735535
4325765	13.7154	61.2076	-2.15572	0.0021751	supported by CI555474 and CI771629
4332099	14.6495	39.8438	-1.44327	0.00218551	supported by AK060765
4347708	960.876	3371.99	-1.8111	0.00219006	supported by AK061438
9272701	3.68057	17.9409	-2.27356	0.0021925	supported by AK067448
4341430	7.23885	24.7487	-1.77857	0.00222523	supported by AK066655
9267235	4.07933	19.4246	-2.25538	0.00222928	ab initio prediction with EST support
4329425	12.141	53.3059	-2.13402	0.00232412	ab initio prediction with EST support
4352177	256.034	1335.87	-2.38318	0.00233146	supported by AK065433
4324405	12.221	35.0594	-1.52449	0.00237727	ab initio prediction with EST support
9267011	20.9719	48.036	-1.19689	0.00239752	supported by CI037928 and CI299993
4346436	38.1409	78.06	-1.03276	0.00240224	supported by AK065634
4339236	45.3157	97.1655	-1.0958	0.00242175	supported by AK059889
4346359	30.175	66.9639	-1.14483	0.00242615	supported by AK119354
9269204	35.9473	84.4237	-1.23167	0.00246114	ab initio prediction with EST support
4333305	10.8686	31.572	-1.53736	0.00251869	ab initio prediction with EST support
4333420	18.3158	44.2603	-1.26914	0.00252014	supported by AK069904
4339396	18.2264	46.5701	-1.35077	0.00254146	supported by AK110876
novel.1390	12.0001	51.7334	-2.1021	0.00254499	PF07714:Protein tyrosine kinase|PF13947:Wall-associated receptor kinase galacturonan-binding
9272609	30.1849	66.4738	-1.13748	0.00263151	supported by CI438026 and CI662058
novel.1514	2.56868	15.6018	-2.62337	0.00265018	-
novel.1357	21.0962	54.4695	-1.36825	0.00268291	-
9266779	29.1824	61.7596	-1.08077	0.00268774	supported by CI549966 and CI766411
9269251	3.33265	19.1591	-2.50704	0.00272715	supported by CI441445 and CI664709
4346147	30.6178	91.3626	-1.57876	0.00273657	supported by AK101015
novel.173	8.95651	28.9121	-1.68521	0.00274265	PF04419:4F5 protein family
4336932	47.7012	96.517	-1.01481	0.00277566	supported by AK067687
4351813	15.3464	43.314	-1.49192	0.00279413	supported by AK068338
4335062	0	6.04732	-5.13176	0.00282845	supported by AK100766
4352628	19.7905	46.1647	-1.21769	0.00287691	supported by AK070634
4352694	34.7551	72.4773	-1.06356	0.00287936	ab initio prediction with EST support
9268843	68.9591	154.595	-1.16555	0.0028841	ab initio prediction with EST support
novel.710	32.4114	68.2815	-1.0711	0.00290232	-
4336879	0.902866	10.8695	-3.55577	0.00290417	supported by CI435476 and CI659899
4350377	1.84029	14.6004	-2.97807	0.00294858	supported by AK064748
novel.202	4.30664	20.0487	-2.21021	0.00295762	PF10551:MULE transposase domain|PF03108:MuDR family transposase|PF09322:Domain of unknown function (DUF1979)
novel.158	27.6754	63.5014	-1.19241	0.0029647	-
3131459	14.6708	43.0356	-1.54545	0.00296818	-
novel.564	21.497	391.266	-4.1846	0.00297753	-
4330708	28.3141	57.3349	-1.01744	0.0030137	supported by AF435648
9267587	6.89226	23.3394	-1.76163	0.00303151	Non-protein coding transcript%2C uncharacterized transcript~supported by AK106713
4331118	0	5.93812	-5.10925	0.00308459	supported by AK111376
4352927	8.47135	26.6108	-1.65706	0.00309709	supported by CI015594 and CI293338
4330661	2.20448	14.0089	-2.6774	0.00311992	supported by AK073311
4328602	10.416	31.1963	-1.58755	0.00314761	ab initio prediction with EST support
4347468	8.31551	27.0083	-1.6936	0.00316918	supported by AK072354
4351159	7.50205	28.1219	-1.90781	0.00318709	supported by CI544984 and CI761771
novel.1544	4.32157	20.2548	-2.22055	0.0031957	-
4324522	23.2252	53.1497	-1.19942	0.00320821	supported by AK058767
4344166	30.8526	66.4069	-1.101	0.00321214	supported by AK071875
4345978	3.38549	18.7219	-2.46212	0.00324129	supported by AK060670
4352736	5.03503	20.0611	-2.00064	0.00332021	supported by AK106406
novel.40	31.4733	65.0253	-1.04306	0.00333863	-
4341809	31.0755	65.0343	-1.06168	0.00334317	ab initio prediction with EST support
4350232	35.234	87.2736	-1.30857	0.00338566	ab initio prediction with EST support
4329729	4.02649	19.8825	-2.30215	0.00339664	supported by AY347881
4330512	9.09541	28.8671	-1.66657	0.00340696	supported by AK070279
4327094	31.0237	66.877	-1.10247	0.00344729	supported by AK100525
4336966	3.35026	17.4237	-2.36031	0.00346218	supported by AK062295
novel.1224	7.27509	29.0463	-1.98238	0.00347257	-
9271714	5.48698	23.061	-2.05645	0.00350479	Non-protein coding transcript%2C unclassifiable transcript~supported by AK062857
4332998	30.1208	84.7074	-1.48909	0.00354002	supported by AK066671
novel.315	29.2718	60.8347	-1.05531	0.00357408	-
4343387	4.33986	19.6804	-2.1736	0.00357875	supported by AK121812
4349723	17.477	48.0905	-1.46713	0.00359911	ab initio prediction with EST support
4340563	48.722	104.378	-1.09842	0.00364989	supported by AK063733
novel.1282	44.9495	99.1542	-1.1384	0.00367302	PF05699:hAT family C-terminal dimerisation region|PF14291:Domain of unknown function (DUF4371)
novel.1206	1.85857	14.1081	-2.91843	0.0036747	-
4326202	11.1996	40.2031	-1.84015	0.00368868	supported by AK107988
4337095	9.7052	28.6685	-1.56354	0.00370865	supported by AK068564
4330688	19.7926	45.7768	-1.20572	0.00371209	supported by AK069210
4336215	3.47155	17.8336	-2.3663	0.00377077	supported by AK111976
9272052	5.58997	24.9162	-2.15732	0.00379094	supported by AK065835
4349951	22.7434	52.8805	-1.21092	0.00379451	ab initio prediction with EST support
9269884	13.6639	36.965	-1.43139	0.0038229	supported by AK073683
9269343	6.42239	24.4951	-1.91874	0.00385003	supported by AK069999
9267553	20.8174	48.5876	-1.21934	0.00390786	ab initio prediction with EST support
novel.41	7.27442	28.0748	-1.93494	0.00392057	-
4327503	9.4081	35.1873	-1.90261	0.00401463	ab initio prediction with EST support
4329184	13.6795	34.7257	-1.3406	0.00402776	supported by AK101809
4350956	0.920478	10.1934	-3.45368	0.00411249	ab initio prediction with EST support
4326397	0.32964	10.8516	-5.01253	0.00411553	supported by AK109536
4335428	6.78725	24.5156	-1.84828	0.00411669	supported by AK068128
4329371	18.7149	46.3414	-1.30184	0.00420309	ab initio prediction with EST support
4338915	1.23318	13.4268	-3.43485	0.00422579	supported by AK108250
4343680	5.67603	23.7318	-2.06588	0.00430417	supported by AK120026
4335202	2.56935	21.1042	-3.05021	0.00435274	supported by AY382617
4338954	26.094	56.2865	-1.10953	0.00436224	supported by AK107567
4342305	11.8396	36.6746	-1.61927	0.00438622	Non-protein coding transcript%2C unclassifiable transcript~supported by AK111259
4326685	46.1165	93.438	-1.01698	0.00440611	supported by AK069479
novel.792	8.02177	27.8606	-1.7905	0.00441125	-
4341698	54.2058	135.341	-1.31691	0.00445336	ab initio prediction with EST support
4325830	0	6.01251	-5.12482	0.00446452	supported by CI422652 and CI649416
novel.1296	28.8286	216.257	-2.90611	0.00448207	-
9266917	24.2537	52.1894	-1.10403	0.00448452	Non-protein coding transcript%2C putative npRNA~supported by CI457656 and CI679454
9272417	0.312697	7.45664	-4.47238	0.00464393	supported by AK059784
novel.1562	28.5912	58.8504	-1.04316	0.00473383	PF04927:Seed maturation protein
4352328	6.50978	21.5722	-1.7236	0.00487878	ab initio prediction with EST support
4325066	2.48396	17.5105	-2.81211	0.00489197	supported by AK111415
4349194	39.8097	113.443	-1.51012	0.00494382	supported by CI555758 and CI771887
9270528	8.00112	29.9295	-1.91717	0.00498686	ab initio prediction with EST support
4340843	2.50024	13.4022	-2.42369	0.00498919	supported by CI433582 and CI658283
4325326	22.7414	54.3095	-1.25023	0.00505983	supported by AK110832
4351428	13.1405	39.9214	-1.59628	0.00509986	ab initio prediction with EST support
4333418	2.84682	16.8867	-2.57385	0.00511391	supported by AK070268
9272553	0.607781	9.11213	-3.88043	0.00524294	supported by AK108625
9267377	19.5124	45.1426	-1.20454	0.0052964	supported by AK064569
4347131	13.3688	34.3479	-1.3583	0.00535946	supported by AK106115
9267437	1.52826	11.7044	-2.91856	0.00539729	ab initio prediction with EST support
4327125	15.1888	36.5976	-1.26613	0.00540643	supported by AK121228
4334182	0.295084	7.86416	-4.54818	0.00545354	supported by AK107231
9267824	17.0155	46.3203	-1.4397	0.00554542	Non-protein coding transcript%2C unclassifiable transcript~supported by AK064674
9269790	21.457	45.5854	-1.08478	0.00566165	supported by AK107039
4351880	9.33966	25.9918	-1.47675	0.00572636	supported by AK101891
4348105	5.24406	20.4787	-1.95813	0.00581367	supported by AK111104
novel.1429	0.971978	10.1041	-3.4154	0.00583964	PF14368:Probable lipid transfer
4352309	0	5.26947	-4.93567	0.00585032	ab initio prediction with EST support
9269230	18.784	43.2542	-1.1979	0.00585368	ab initio prediction with EST support
4341398	34.7229	75.1997	-1.11525	0.00588111	supported by CI451699 and CI673818
9266559	3.17646	14.819	-2.23508	0.0058834	supported by CI427420 and CI653598
novel.293	32.5049	82.3501	-1.34465	0.00602361	-
4339310	0.295084	7.28289	-4.44366	0.00605911	supported by AK107211
novel.380	3.12496	14.9381	-2.25608	0.0061398	-
9266513	44.9445	94.5482	-1.06702	0.00616175	supported by AK069343
novel.198	23.7845	51.3741	-1.10528	0.00621916	PF00069:Protein kinase domain
novel.372	13.0887	31.9994	-1.2902	0.00624426	PF05754:Domain of unknown function (DUF834)
4340683	1.52759	11.0159	-2.83082	0.00637345	supported by AK107483
9272462	6.16253	21.5299	-1.79733	0.00642515	ab initio prediction with EST support
4324947	1.24945	10.7127	-3.09864	0.00646161	supported by AK102239
4335069	15.5035	36.476	-1.23285	0.00652055	ab initio prediction with EST support
novel.918	15.452	39.9015	-1.3662	0.00656701	PF00067:Cytochrome P450
novel.397	11.5259	31.5125	-1.45233	0.00659573	PF10536:Plant mobile domain
4327988	48.3733	97.1201	-1.00907	0.00660768	supported by AK067143
4348368	2.20582	20.56	-3.22319	0.00670934	supported by AK073245
9267730	55.1787	119.084	-1.11023	0.00678131	supported by CI519331 and CI737533
4333472	13.2625	33.7119	-1.3414	0.00688976	supported by AK109821
4330085	17.3608	39.5632	-1.18738	0.00695418	ab initio prediction with EST support
4334054	22.3612	52.3716	-1.22673	0.00696109	supported by AK062272
4344438	13.3648	40.9812	-1.61234	0.00704184	supported by AK064224
9271394	1.21489	10.8646	-3.14012	0.00708752	ab initio prediction with EST support
4340640	11.7897	31.6017	-1.42076	0.00726645	supported by AK105105
4334846	5.24205	19.0743	-1.85584	0.00735834	supported by AK072880
9267584	25.1715	52.8899	-1.06782	0.00755604	ab initio prediction with EST support
4328399	52.3599	125.034	-1.25633	0.00757395	supported by AK070929
9270209	13.3383	43.8455	-1.71446	0.00758343	supported by CI562093 and CI777595
4333632	29.2389	63.3572	-1.11126	0.0075867	supported by AK121321
4337942	0	4.96368	-4.84751	0.00763562	supported by CI361688 and CI602619
4326254	20.189	48.3517	-1.25229	0.00769986	supported by AK062640
4347181	36.5984	343.288	-3.22923	0.00775166	supported by AK106970
4335514	7.53594	24.8113	-1.72448	0.00788614	ab initio prediction with EST support
4327353	3.07346	14.3816	-2.21717	0.00800853	ab initio prediction with EST support
9267830	13.9543	37.8531	-1.43875	0.00806104	ab initio prediction with EST support
4344635	6570.49	31950	-2.28174	0.00811083	supported by CI435816 and CI660219
9272191	9.75536	26.0364	-1.42222	0.00822281	supported by AK073933
4325576	6.76862	36.877	-2.45295	0.00828814	ab initio prediction with EST support
4342859	10.7097	27.8881	-1.38597	0.00831298	supported by AK070788
novel.171	0.624725	8.96827	-3.84984	0.0083184	-
4334637	7.41265	22.3526	-1.58457	0.00853362	supported by AK072695
4337707	17.1673	38.9985	-1.18252	0.00857039	supported by AK064692
4329728	0.971978	9.41792	-3.31297	0.00862717	supported by AK121446
3131444	1.85723	11.5034	-2.62813	0.00869375	-
4324699	30.9031	66.0792	-1.09067	0.00869639	supported by AK070988
4327049	11.6634	30.8159	-1.40594	0.00870854	supported by CI414520 and CI642497
4325090	8.75016	25.2212	-1.53016	0.00871459	supported by AK060162
4325978	22.6201	46.6118	-1.04606	0.00886542	supported by AK105373
4350507	27.6551	62.3403	-1.1681	0.00903251	supported by AK107976
4331479	1.31856	13.8243	-3.42339	0.00905681	ab initio prediction with EST support
4339785	9.06152	25.4622	-1.49064	0.009225	supported by AK072823
9267348	0	4.85939	-4.82124	0.00924449	supported by CI448460 and CI670852
9266120	25.0881	224.456	-3.1608	0.00939054	supported by CI542282 and CI759151
3131410	20.2239	41.5538	-1.03808	0.00958749	-
4348181	16.7869	36.9209	-1.13623	0.00959107	supported by AK068977
4325698	36.1139	74.4372	-1.0409	0.00965894	supported by AK121025
novel.1560	160.281	1145.27	-2.83679	0.00972122	PF02458:Transferase family
4351354	20.3611	48.1065	-1.23881	0.00974193	supported by AK099904
9268382	2.48262	13.6653	-2.45276	0.00982628	ab initio prediction with EST support
9271527	5.31317	19.8577	-1.90578	0.00984276	ab initio prediction with EST support
9269330	12.3237	32.9858	-1.41351	0.00987434	Non-protein coding transcript%2C unclassifiable transcript~supported by CI481626 and CI702044
4347516	13.0202	30.7191	-1.23444	0.00987571	ab initio prediction with EST support
4345789	4.73896	55.8288	-3.5484	0.0101854	supported by AK119564
4351931	7.13451	21.3414	-1.57995	0.0102919	supported by AK061213
4332797	32.4768	76.2403	-1.22677	0.0104523	supported by AK104974
4324159	77.2859	173.236	-1.16582	0.0105792	supported by AK106043
4337045	72.91	156.734	-1.10481	0.0107149	supported by AK105231
9270651	4.06372	17.9755	-2.14621	0.0107696	Non-protein coding transcript%2C unclassifiable transcript~supported by CI447492 and CI669913
novel.645	5.85117	19.5617	-1.73616	0.0107777	-
9272494	0.971978	9.04521	-3.25459	0.0108693	supported by CI068812 and CI309369
4334004	0	4.5412	-4.72233	0.011051	ab initio prediction with EST support
novel.1378	4.58411	17.7592	-1.93976	0.0111476	-
4325734	461.16	1026.52	-1.15447	0.0111562	supported by AK107858
4340330	27.6186	58.3609	-1.07294	0.0111564	supported by AK109202
4328853	5.29422	18.1798	-1.78141	0.0111609	supported by AK105563
4329816	18.5384	43.865	-1.23827	0.011163	supported by AK119439
4340546	23.7689	49.9054	-1.06659	0.0111922	supported by AK109260
4349629	12.5504	34.9003	-1.47008	0.0112983	supported by CI371035 and CI609576
4324997	50.5127	104.066	-1.04185	0.011328	supported by AK108538
novel.417	0	6.07704	-5.13908	0.011422	-
novel.657	14.5146	37.0829	-1.35073	0.0114251	-
4325764	19.4995	105.377	-2.43265	0.0114305	supported by AK064612
4341571	6.87465	20.6003	-1.58211	0.0114874	supported by CI423633 and CI650271
4346133	2.48196	12.0177	-2.27118	0.0115274	supported by AK109469
9272251	19.8563	44.375	-1.15838	0.0115511	ab initio prediction with EST support
9272177	6.6324	21.2863	-1.68747	0.0115783	ab initio prediction with EST support
4341269	24.0809	49.8037	-1.0454	0.0115826	supported by AK065388
4342542	0.971978	8.77406	-3.20914	0.0115842	supported by AK067073
4339084	0.312697	8.39839	-4.64142	0.0115903	supported by AK103822
4346830	15.2447	40.2191	-1.39086	0.0116301	ab initio prediction with EST support
4331359	42.7689	89.202	-1.05887	0.0118041	supported by AK062759
4349834	8.05566	28.3671	-1.8105	0.0118218	supported by AK070475
novel.1225	19.3901	41.2278	-1.08719	0.0118839	-
4324183	20.504	42.3118	-1.04314	0.0120052	supported by AY676926
9269605	3.36721	15.3259	-2.17246	0.0120185	Non-protein coding transcript%2C unclassifiable transcript~supported by AK111026
4344575	5.65842	18.3535	-1.70223	0.0120247	supported by AK103896
novel.599	21.8917	45.3665	-1.05085	0.0121107	-
3131431	14.6688	37.0972	-1.32962	0.0122023	-
4327460	7.17107	22.6265	-1.66057	0.0122833	supported by AK067556
novel.608	3.48916	15.4326	-2.15128	0.0123467	-
